# Supplementary material for: Reprogramming of GM-CSF-dependent alveolar macrophages through GSK3 activity modulation
Source: eLife. 2025 May 14;14:RP102659. doi: 10.7554/eLife.102659 (PMC12077879; doi:10.7554/eLife.102659)
Supplement: Figure 1—source data 3. [file elife-102659-fig1-data3.xlsx]

## Sheet: Figure 1A
Figure 1 - Source Data 3
Figure 1A
Densitometry of pGSK3α Ser21				Densitometry of pGSK3β Ser9				Densitometry of MAFB
	M-MØ	GM-MØ			M-MØ	GM-MØ			M-MØ	GM-MØ
d1	1	0.714457		d5	1	0.296896		d5	1	0.112549
d2	1	0.642744		d6	1	0.304447		d6	1	0.093137
d3	1	0.689234		d7	1	0.2544		d7	1	0.150995
d4	1	0.624667
				GraphPad Prism 9				GraphPad Prism 9
GraphPad Prism 9				Paired t test				Paired t test
Paired t test				P value	0.0039			P value	0.0004
P value	0.0005			P value summary	**			P value summary	***
P value summary	***			Significantly different (P < 0.05)?	Yes			Significantly different (P < 0.05)?	Yes
Significantly different (P < 0.05)?	Yes			One- or two-tailed P value?	Two-tailed			One- or two-tailed P value?	Two-tailed
One- or two-tailed P value?	Two-tailed			t, df	t=4.547, df=6			t, df	t=51.83, df=2
t, df	t=16.08, df=3			Number of pairs	7			Number of pairs	3
Number of pairs	4
				How big is the difference?				How big is the difference?
How big is the difference?				Mean of differences (B - A)	-0.4606			Mean of differences (B - A)	-0.8811
Mean of differences (B - A)	-0.3322			SD of differences	0.268			SD of differences	0.02945
SD of differences	0.04133			SEM of differences	0.1013			SEM of differences	0.017
SEM of differences	0.02067			95% confidence interval	-0.7085 to -0.2127			95% confidence interval	-0.9543 to -0.8080
95% confidence interval	-0.3980 to -0.2665			R squared (partial eta squared)	0.7751			R squared (partial eta squared)	0.9993
R squared (partial eta squared)	0.9885
