# Supplementary material for: Reprogramming of GM-CSF-dependent alveolar macrophages through GSK3 activity modulation
Source: eLife. 2025 May 14;14:RP102659. doi: 10.7554/eLife.102659 (PMC12077879; doi:10.7554/eLife.102659)
Supplement: Figure 1—source data 6. [file elife-102659-fig1-data6.xlsx]

## Sheet: Figure 1B
Figure 1 - Source Data 6
Figure 1B
Densitometry of pGSK3α Tyr279				Densitometry of pGSK3β Tyr216
	M-Mo	GM-Mo			M-Mo	GM-Mo
d1	1	1.15135		d1	1	0.954637
d2	1	1.04248		d2	1	0.913857
d3	1	1.26039		d3	1	0.79816
d4	1	0.59307		d4	1	0.735538
GraphPad Prism 9				GraphPad Prism 9
Paired t test				Paired t test
P value	0.9408			P value	0.0601
P value summary	ns			P value summary	ns
Significantly different (P < 0.05)?	No			Significantly different (P < 0.05)?	No
One- or two-tailed P value?	Two-tailed			One- or two-tailed P value?	Two-tailed
t, df	t=0.08071, df=3			t, df	t=2.949, df=3
Number of pairs	4			Number of pairs	4
How big is the difference?				How big is the difference?
Mean of differences (B - A)	0.01182			Mean of differences (D - C)	-0.1495
SD of differences	0.293			SD of differences	0.1013
SEM of differences	0.1465			SEM of differences	0.05067
95% confidence interval	-0.4544 to 0.4781			95% confidence interval	-0.3107 to 0.01182
R squared (partial eta squared)	0.002167			R squared (partial eta squared)	0.7436
