# Supplementary material for: Reprogramming of GM-CSF-dependent alveolar macrophages through GSK3 activity modulation
Source: eLife. 2025 May 14;14:RP102659. doi: 10.7554/eLife.102659 (PMC12077879; doi:10.7554/eLife.102659)
Supplement: Figure 1—source data 9. [file elife-102659-fig1-data9.xlsx]

## Sheet: Figure 1D
Figure 1 - Source Data 9
Figure 1D
Densitometry of pGSK3α Tyr279				Densitometry of pGSK3β Tyr216
	DMSO-GM-Mo	CHIR-GM-Mo			DMSO-GM-Mo	CHIR-GM-Mo
d1	1	0.926725		d1	1	0.424654
d2	1	1.11064		d2	1	0.449985
d3	1	0.974498		d3	1	0.468015
GraphPad Prism 9				GraphPad Prism 9
Paired t test				Paired t test
P value	0.9493			P value	0.0005
P value summary	ns			P value summary	***
Significantly different (P < 0.05)?	No			Significantly different (P < 0.05)?	Yes
One- or two-tailed P value?	Two-tailed			One- or two-tailed P value?	Two-tailed
t, df	t=0.07174, df=2			t, df	t=43.93, df=2
Number of pairs	3			Number of pairs	3
How big is the difference?				How big is the difference?
Mean of differences (B - A)	0.003953			Mean of differences (D - C)	-0.5524
SD of differences	0.09543			SD of differences	0.02178
SEM of differences	0.0551			SEM of differences	0.01258
95% confidence interval	-0.2331 to 0.2410			95% confidence interval	-0.6066 to -0.4983
R squared (partial eta squared)	0.002567			R squared (partial eta squared)	0.999
