# Supplementary material for: Reprogramming of GM-CSF-dependent alveolar macrophages through GSK3 activity modulation
Source: eLife. 2025 May 14;14:RP102659. doi: 10.7554/eLife.102659 (PMC12077879; doi:10.7554/eLife.102659)
Supplement: Figure 2—source data 1. — Top 15 transcription factors are shown. [file elife-102659-fig2-data1.xlsx]

## Sheet: Figure 2A
Figure 2 - Source Data 1
Figure 2A
DoRothEA analysis
TF	NES
ZNF263	6.08194
MYC	3.9831
NR2F6	3.47524
MAFB	3.19032
ARNT	2.79257
MEF2C	-3.11922
EBF1	-3.1937
TBX21	-3.22785
MAZ	-3.23306
NFYB	-3.33194
KLF5	-3.42459
MEF2A	-3.86502
PRDM14	-3.9008
FOXO3	-4.61712
