# Supplementary material for: Reprogramming of GM-CSF-dependent alveolar macrophages through GSK3 activity modulation
Source: eLife. 2025 May 14;14:RP102659. doi: 10.7554/eLife.102659 (PMC12077879; doi:10.7554/eLife.102659)
Supplement: Figure 2—source data 2. [file elife-102659-fig2-data2.xlsx]

## Sheet: Figure 2D
Figure 2 - Source Data 2
Figure 2D
DESEQ2 analysis
Read counts of CCL2				Read counts of CCL8				Read counts of CCL18
	DMSO-GM-MØ	CHIR-GM-MØ			DMSO-GM-MØ	CHIR-GM-MØ			DMSO-GM-MØ	CHIR-GM-MØ
d1	323	29518		d1	0	61		d1	378	7963
d2	698	42966		d2	0	104		d2	159	1810
d3	909	42899		d3	0	172		d3	90	3242
Read counts of IGF1				Read counts of IL10				Read counts of LGMN
	DMSO-GM-MØ	CHIR-GM-MØ			DMSO-GM-MØ	CHIR-GM-MØ			DMSO-GM-MØ	CHIR-GM-MØ
d1	1	41		d1	10	454		d1	460.99	46659
d2	0	36		d2	6	571		d2	347	26735
d3	1	145		d3	13	564		d3	896	47660
Read counts of SPP1				Read counts of INHBA
	DMSO-GM-MØ	CHIR-GM-MØ			DMSO-GM-MØ	CHIR-GM-MØ
d1	35232	207704		d1	2813	35
d2	38426	198287		d2	2348	51
d3	50386	250384		d3	2441	22
