# Supplementary material for: Reprogramming of GM-CSF-dependent alveolar macrophages through GSK3 activity modulation
Source: eLife. 2025 May 14;14:RP102659. doi: 10.7554/eLife.102659 (PMC12077879; doi:10.7554/eLife.102659)
Supplement: Figure 2—source data 5. [file elife-102659-fig2-data5.xlsx]

## Sheet: Figure 2E
Figure 2 - Source Data 5
Figure 2E
Densitometry of CD163				Densitometry of MAF				Densitometry of IL7R
	DMSO-GM-MØ	CHIR-GM-MØ			DMSO-GM-MØ	CHIR-GM-MØ			DMSO-GM-MØ	CHIR-GM-MØ
d1	1	6.51552		d1	1	68.6941		d1	1	0.724179
d2	1	8.98153		d2	1	55.2686		d2	1	1.45119
d3	1	6.76688		d3	1	57.9448		d3	1	1.73682
d4	1	4.89906		d4	1	4.11905		d4	1	1.66151
d5	1	9.24532		d5	1	40.94		d5	1	0.818278
d6	1	3.29014		d6	1	87.0445		d6	1	1.77771
d7	1	5.12935		d7	1	55.6459		d7	1	1.3171
GraphPad Prism 9				GraphPad Prism 9				GraphPad Prism 9
Paired t test				Paired t test				Paired t test
P value	0.0006			P value	0.0018			P value	0.072
P value summary	***			P value summary	**			P value summary	ns
Significantly different (P < 0.05)?	Yes			Significantly different (P < 0.05)?	Yes			Significantly different (P < 0.05)?	No
One- or two-tailed P value?	Two-tailed			One- or two-tailed P value?	Two-tailed			One- or two-tailed P value?	Two-tailed
t, df	t=6.566, df=6			t, df	t=5.324, df=6			t, df	t=2.180, df=6
Number of pairs	7			Number of pairs	7			Number of pairs	7
How big is the difference?				How big is the difference?				How big is the difference?
Mean of differences (B - A)	5.404			Mean of differences (B - A)	51.81			Mean of differences (B - A)	0.3553
SD of differences	2.177			SD of differences	25.74			SD of differences	0.4311
SEM of differences	0.823			SEM of differences	9.73			SEM of differences	0.1629
95% confidence interval	3.390 to 7.418			95% confidence interval	28.00 to 75.62			95% confidence interval	-0.04345 to 0.7540
R squared (partial eta squared)	0.8778			R squared (partial eta squared)	0.8253			R squared (partial eta squared)	0.442
