# Supplementary material for: Reprogramming of GM-CSF-dependent alveolar macrophages through GSK3 activity modulation
Source: eLife. 2025 May 14;14:RP102659. doi: 10.7554/eLife.102659 (PMC12077879; doi:10.7554/eLife.102659)
Supplement: Figure 2—source data 8. [file elife-102659-fig2-data8.xlsx]

## Sheet: Figure 2F
Figure 2 - Source Data 8
Figure 2F
Densitometry of FOLR2
	DMSO-GM-MØ	CHIR-GM-MØ
d1	1	8.29514
d2	1	8.433
d3	1	5.96575
GraphPad Prism 9
Paired t test
P value	0.0145
P value summary	*
Significantly different (P < 0.05)?	Yes
One- or two-tailed P value?	Two-tailed
t, df	t=8.201, df=2
Number of pairs	3
How big is the difference?
Mean of differences (B - A)	6.565
SD of differences	1.386
SEM of differences	0.8004
95% confidence interval	3.121 to 10.01
R squared (partial eta squared)	0.9711
