# Supplementary material for: Reprogramming of GM-CSF-dependent alveolar macrophages through GSK3 activity modulation
Source: eLife. 2025 May 14;14:RP102659. doi: 10.7554/eLife.102659 (PMC12077879; doi:10.7554/eLife.102659)
Supplement: Figure 2—source data 9. [file elife-102659-fig2-data9.xlsx]

## Sheet: Figure 2G
Figure 2 - Source Data 9
Figure 2G
Quantification of CCL2				Quantification of CCL18				Quantification of IL-10				Quantification of LGMN				Quantification of SPP1				Quantification of Activin A
	DMSO-GM-MØ	CHIR-GM-MØ			DMSO-GM-MØ	CHIR-GM-MØ			DMSO-GM-MØ	CHIR-GM-MØ			DMSO-GM-MØ	CHIR-GM-MØ			DMSO-GM-MØ	CHIR-GM-MØ			DMSO-GM-MØ	CHIR-GM-MØ
d1	0.498802	146.882		d1	3610	8434.1		d1	10.7	94.5		d1	262.3	8528		d1	144.503	315.369		d1	2097.4	1306.9
d2	4.49092	96.3685		d2	3871.1	7296.8		d2	7.4	65.8		d2	307.3	6788.8		d2	490.154	388.225		d2	3440.1	1655.5
d3	16.0908	166.054		d3	4652.5	10189.7		d3	9.2	84.9		d3	278	7874.3		d3	248.497	378.161		d3	3980	1833.7
d4	13.2234	179.029		d4	1787.5	2611.7		d4	4.8	97.4		d4	273	8469.2		d4	195.918	326.416		d4	3100.5	2181.9
d5	7.27212	212.861		d5	975.9	2952.6		d5	11.4	66.4		d5	241.1	6985.4		d5	308.841	462.106		d5	1810.3	890
d6	0	26.5351		d6	1960.4	11014.3		d6	7.8	206		d6	104	2626.2		d6	185.588	231.425		d6	1645.2	1000.8
d7	1.77682	193.39		d7	2240.4	8396.9		d7	6.2	78.2		d7	148.4	6303.5		d7	175.382	345.435		d7	3036.7	2416.9
GraphPad Prism 9				GraphPad Prism 9				GraphPad Prism 9				GraphPad Prism 9				GraphPad Prism 9				GraphPad Prism 9
Paired t test				Paired t test				Paired t test				Paired t test				Paired t test				Paired t test
P value	0.001			P value	0.0048			P value	0.0027			P value	0.0001			P value	0.0366			P value	0.0026
P value summary	***			P value summary	**			P value summary	**			P value summary	***			P value summary	*			P value summary	**
Significantly different (P < 0.05)?	Yes			Significantly different (P < 0.05)?	Yes			Significantly different (P < 0.05)?	Yes			Significantly different (P < 0.05)?	Yes			Significantly different (P < 0.05)?	Yes			Significantly different (P < 0.05)?	Yes
One- or two-tailed P value?	Two-tailed			One- or two-tailed P value?	Two-tailed			One- or two-tailed P value?	Two-tailed			One- or two-tailed P value?	Two-tailed			One- or two-tailed P value?	Two-tailed			One- or two-tailed P value?	Two-tailed
t, df	t=5.974, df=6			t, df	t=4.356, df=6			t, df	t=4.888, df=6			t, df	t=8.840, df=6			t, df	t=2.678, df=6			t, df	t=4.929, df=6
Number of pairs	7			Number of pairs	7			Number of pairs	7			Number of pairs	7			Number of pairs	7			Number of pairs	7
How big is the difference?				How big is the difference?				How big is the difference?				How big is the difference?				How big is the difference?				How big is the difference?
Mean of differences (B - A)	139.7			Mean of differences (B - A)	4543			Mean of differences (B - A)	90.81			Mean of differences (B - A)	6566			Mean of differences (B - A)	99.75			Mean of differences (B - A)	-1118
SD of differences	61.86			SD of differences	2759			SD of differences	49.16			SD of differences	1965			SD of differences	98.56			SD of differences	600
SEM of differences	23.38			SEM of differences	1043			SEM of differences	18.58			SEM of differences	742.7			SEM of differences	37.25			SEM of differences	226.8
95% confidence interval	82.47 to 196.9			95% confidence interval	1991 to 7095			95% confidence interval	45.35 to 136.3			95% confidence interval	4749 to 8383			95% confidence interval	8.597 to 190.9			95% confidence interval	-1673 to -562.8
R squared (partial eta squared)	0.8561			R squared (partial eta squared)	0.7597			R squared (partial eta squared)	0.7993			R squared (partial eta squared)	0.9287			R squared (partial eta squared)	0.5444			R squared (partial eta squared)	0.8019
