# Supplementary material for: Reprogramming of GM-CSF-dependent alveolar macrophages through GSK3 activity modulation
Source: eLife. 2025 May 14;14:RP102659. doi: 10.7554/eLife.102659 (PMC12077879; doi:10.7554/eLife.102659)
Supplement: Figure 3—source data 1. [file elife-102659-fig3-data1.xlsx]

## Sheet: Figure 3A
Figure 3 - Source Data 1
Figure 3A
Quantification of IL-10				Quantification of IL-10				Quantification of IL-10				Quantification of IL-10				Quantification of IL-10
	DMSO-GM-MØ	CHIR-GM-MØ			DMSO-GM-MØ (LPS)	CHIR-GM-MØ (LPS)			DMSO-GM-MØ (TNFα)	CHIR-GM-MØ (TNFα)			DMSO-GM-MØ (IFNγ)	CHIR-GM-MØ (IFNγ)			DMSO-GM-MØ (CL264)	CHIR-GM-MØ (CL264)
d1	22.1	213.1		d1	150.9	1232.1		d1	22.6	235.4		d1	24	216.9		d1	25.1	222.3
d2	19.3	195.9		d2	313.2	2378.5		d2	23.8	253.1		d2	23.4	212.3		d2	32.6	255
d3	36.5	263.5		d3	74.3	509.8		d3	40.8	206.9		d3	31.1	240.6		d3	19.1	267
d4	16.3	270.9		d4	99.9	1751		d4	13.1	257		d4	17.2	235.8		d4	12.1	293.7
GraphPad Prism 9				GraphPad Prism 9				GraphPad Prism 9				GraphPad Prism 9				GraphPad Prism 9
Paired t test				Paired t test				Paired t test				Paired t test				Paired t test
P value	0.0012			P value	0.0344			P value	0.0011			P value	<0.0001			P value	0.0009
P value summary	**			P value summary	*			P value summary	**			P value summary	****			P value summary	***
Significantly different (P < 0.05)?	Yes			Significantly different (P < 0.05)?	Yes			Significantly different (P < 0.05)?	Yes			Significantly different (P < 0.05)?	Yes			Significantly different (P < 0.05)?	Yes
One- or two-tailed P value?	Two-tailed			One- or two-tailed P value?	Two-tailed			One- or two-tailed P value?	Two-tailed			One- or two-tailed P value?	Two-tailed			One- or two-tailed P value?	Two-tailed
t, df	t=12.04, df=3			t, df	t=3.696, df=3			t, df	t=12.62, df=3			t, df	t=28.99, df=3			t, df	t=13.15, df=3
Number of pairs	4			Number of pairs	4			Number of pairs	4			Number of pairs	4			Number of pairs	4
How big is the difference?				How big is the difference?				How big is the difference?				How big is the difference?				How big is the difference?
Mean of differences (B - A)	212.3			Mean of differences (B - A)	1308			Mean of differences (B - A)	213			Mean of differences (B - A)	202.5			Mean of differences (B - A)	237.3
SD of differences	35.28			SD of differences	708			SD of differences	33.76			SD of differences	13.97			SD of differences	36.08
SEM of differences	17.64			SEM of differences	354			SEM of differences	16.88			SEM of differences	6.984			SEM of differences	18.04
95% confidence interval	156.2 to 268.4			95% confidence interval	181.6 to 2435			95% confidence interval	159.3 to 266.8			95% confidence interval	180.2 to 224.7			95% confidence interval	179.9 to 294.7
R squared (partial eta squared)	0.9797			R squared (partial eta squared)	0.8199			R squared (partial eta squared)	0.9815			R squared (partial eta squared)	0.9964			R squared (partial eta squared)	0.983
