# Supplementary material for: Reprogramming of GM-CSF-dependent alveolar macrophages through GSK3 activity modulation
Source: eLife. 2025 May 14;14:RP102659. doi: 10.7554/eLife.102659 (PMC12077879; doi:10.7554/eLife.102659)
Supplement: Figure 3—source data 3. — Percentage of positive cells and mean fluorescence intensity in DMSO-GM-MØ and CHIR-GM-MØ from three independent experiments and statistical analysis. [file elife-102659-fig3-data3.xlsx]

## Sheet: Figure 3C
Figure 3 - Source Data 3
Figure 3C
Positive cells (%)
	DMSO-GM-MØ	CHIR-GM-MØ	DMSO-M-MØ
d1	10.35	42.74	75.2
d2	28.7	54.07	70.06
d3	10.95	52.04	79.24
GraphPad Prism 9
Uncorrected Fisher's LSD	Mean Diff.	95.00% CI of diff.	Below threshold?	Summary	Individual P Value
GM-Mo DMSO vs. GM-Mo CHIR	-32.95	-50.20 to -15.70	Yes	**	0.0061	A-B
GM-Mo DMSO vs. M-Mo DMSO	-58.17	-75.42 to -40.91	Yes	***	0.0007	A-C
GM-Mo CHIR vs. M-Mo DMSO	-25.22	-42.47 to -7.962	Yes	*	0.0154	B-C
Test details	Mean 1	Mean 2	Mean Diff.	SE of diff.	n1	n2	t	DF
GM-Mo DMSO vs. GM-Mo CHIR	16.67	49.62	-32.95	6.215	3	3	5.302	4
GM-Mo DMSO vs. M-Mo DMSO	16.67	74.83	-58.17	6.215	3	3	9.36	4
GM-Mo CHIR vs. M-Mo DMSO	49.62	74.83	-25.22	6.215	3	3	4.058	4
MFI (10^5)
	DMSO-GM-MØ	CHIR-GM-MØ	DMSO-M-MØ
d1	197945	292955	357183
d2	213538	343388	408860
d3	194655	320357	422863
GraphPad Prism 9
Uncorrected Fisher's LSD	Mean Diff.	95.00% CI of diff.	Below threshold?	Summary	Individual P Value
GM-Mo DMSO vs. GM-Mo CHIR	-116854	-158503 to -75205	Yes	**	0.0015	A-B
GM-Mo DMSO vs. M-Mo DMSO	-194256	-235905 to -152607	Yes	***	0.0002	A-C
GM-Mo CHIR vs. M-Mo DMSO	-77402	-119051 to -35753	Yes	**	0.0067	B-C
Test details	Mean 1	Mean 2	Mean Diff.	SE of diff.	n1	n2	t	DF
GM-Mo DMSO vs. GM-Mo CHIR	202046	318900	-116854	15001	3	3	7.79	4
GM-Mo DMSO vs. M-Mo DMSO	202046	396302	-194256	15001	3	3	12.95	4
GM-Mo CHIR vs. M-Mo DMSO	318900	396302	-77402	15001	3	3	5.16	4
