# Supplementary material for: Reprogramming of GM-CSF-dependent alveolar macrophages through GSK3 activity modulation
Source: eLife. 2025 May 14;14:RP102659. doi: 10.7554/eLife.102659 (PMC12077879; doi:10.7554/eLife.102659)
Supplement: Figure 4—source data 3. [file elife-102659-fig4-data3.xlsx]

## Sheet: Figure 4B
Figure 4 - Source Data 3
Figure 4B
Densitometry of MAFB
	siCNT-GM-MØ	siGSK3A-GM-MØ	siGSK3B-GM-MØ	siGSK3AB-GM-MØ
d1	1	1.00834	0.796166	1.20633
d2	1	1.38187	1.03591	1.45115
d3	1	0.823482	1.10443	1.40021
GraphPad Prism 9
Uncorrected Fisher's LSD	Mean Diff.	95.00% CI of diff.	Below threshold?	Summary	Individual P Value	A-?
GM-Mo siCTRL vs. GM-Mo siGSK3A	-0.07123	-0.3908 to 0.2483	No	ns	0.6051	B	GM-Mo siGSK3A
GM-Mo siCTRL vs. GM-Mo siGSK3B	0.02117	-0.2984 to 0.3407	No	ns	0.8766	C	GM-Mo siGSK3B
GM-Mo siCTRL vs. GM-Mo siGSK3A/B	-0.3526	-0.6721 to -0.03302	Yes	*	0.0356	D	GM-Mo siGSK3A/B
Test details	Mean 1	Mean 2	Mean Diff.	SE of diff.	n1	n2	t	DF
GM-Mo siCTRL vs. GM-Mo siGSK3A	1	1.071	-0.07123	0.1306	3	3	0.5455	6
GM-Mo siCTRL vs. GM-Mo siGSK3B	1	0.9788	0.02117	0.1306	3	3	0.1621	6
GM-Mo siCTRL vs. GM-Mo siGSK3A/B	1	1.353	-0.3526	0.1306	3	3	2.7	6
Densitometry of GSK3α
	siCNT-GM-MØ	siGSK3A-GM-MØ	siGSK3B-GM-MØ	siGSK3AB-GM-MØ
d1	1	0.462996	1.03024	0.690787
d2	1	0.896906	1.91836	0.526611
d3	1	0.692532	0.958051	0.709498
GraphPad Prism 9
Uncorrected Fisher's LSD	Mean Diff.	95.00% CI of diff.	Below threshold?	Summary	Individual P Value	E-?
GM-Mo siCTRL vs. GM-Mo siGSK3A	0.3159	-0.2562 to 0.8879	No	ns	0.2254	F	GM-Mo siGSK3A
GM-Mo siCTRL vs. GM-Mo siGSK3B	-0.3022	-0.8743 to 0.2698	No	ns	0.2437	G	GM-Mo siGSK3B
GM-Mo siCTRL vs. GM-Mo siGSK3A/B	0.3577	-0.2144 to 0.9298	No	ns	0.1769	H	GM-Mo siGSK3A/B
Test details	Mean 1	Mean 2	Mean Diff.	SE of diff.	n1	n2	t	DF
GM-Mo siCTRL vs. GM-Mo siGSK3A	1	0.6841	0.3159	0.2338	3	3	1.351	6
GM-Mo siCTRL vs. GM-Mo siGSK3B	1	1.302	-0.3022	0.2338	3	3	1.293	6
GM-Mo siCTRL vs. GM-Mo siGSK3A/B	1	0.6423	0.3577	0.2338	3	3	1.53	6
Densitometry of GSK3β
	siCNT-GM-MØ	siGSK3A-GM-MØ	siGSK3B-GM-MØ	siGSK3AB-GM-MØ
d1	1	0.945213	0.441534	0.644036
d2	1	1.48297	0.984495	0.60444
d3	1	1.06323	0.581835	0.743204
GraphPad Prism 9
Uncorrected Fisher's LSD	Mean Diff.	95.00% CI of diff.	Below threshold?	Summary	Individual P Value	I-?
GM-Mo siCTRL vs. GM-Mo siGSK3A	-0.1638	-0.5183 to 0.1907	No	ns	0.3014	J	GM-Mo siGSK3A
GM-Mo siCTRL vs. GM-Mo siGSK3B	0.3307	-0.02382 to 0.6852	No	ns	0.0626	K	GM-Mo siGSK3B
GM-Mo siCTRL vs. GM-Mo siGSK3A/B	0.3361	-0.01842 to 0.6906	No	ns	0.0595	L	GM-Mo siGSK3A/B
Test details	Mean 1	Mean 2	Mean Diff.	SE of diff.	n1	n2	t	DF
GM-Mo siCTRL vs. GM-Mo siGSK3A	1	1.164	-0.1638	0.1449	3	3	1.131	6
GM-Mo siCTRL vs. GM-Mo siGSK3B	1	0.6693	0.3307	0.1449	3	3	2.283	6
GM-Mo siCTRL vs. GM-Mo siGSK3A/B	1	0.6639	0.3361	0.1449	3	3	2.32	6
