# Supplementary material for: Reprogramming of GM-CSF-dependent alveolar macrophages through GSK3 activity modulation
Source: eLife. 2025 May 14;14:RP102659. doi: 10.7554/eLife.102659 (PMC12077879; doi:10.7554/eLife.102659)
Supplement: Figure 5—source data 3. [file elife-102659-fig5-data3.xlsx]

## Sheet: Figure 5B
Figure 5 - Source Data 3
Figure 5B
Densitometry of MAFB
	M-CSF-Mon	DMSO-Mon	CHIR-Mon
d1	1	0.864916	2.21856
d2	1	0.781582	1.4575
d3	1	0.602205	1.36974
GraphPad Prism 9
Dunnett's multiple comparisons test	Mean Diff.	95.00% CI of diff.	Below threshold?	Summary	Adjusted P Value	A-?
M-CSF vs. DMSO	0.2504	-0.4218 to 0.9227	No	ns	0.4364	B	DMSO
M-CSF vs. CHIR	-0.6819	-1.354 to -0.009684	Yes	*	0.0479	C	CHIR
Test details	Mean 1	Mean 2	Mean Diff.	SE of diff.	n1	n2	q	DF
M-CSF vs. DMSO	1	0.7496	0.2504	0.2031	3	3	1.233	4
M-CSF vs. CHIR	1	1.682	-0.6819	0.2031	3	3	3.358	4
