# Supplementary material for: Reprogramming of GM-CSF-dependent alveolar macrophages through GSK3 activity modulation
Source: eLife. 2025 May 14;14:RP102659. doi: 10.7554/eLife.102659 (PMC12077879; doi:10.7554/eLife.102659)
Supplement: Figure 5—source data 4. [file elife-102659-fig5-data4.xlsx]

## Sheet: Figure 5E
Figure 5 - Source Data 4
Figure 5E
DESEQ2 analysis
gene_symbol	Mo_MCSF_A	Mo_MCSF_B	Mo_MCSF_C	Mo_DMSO_A	Mo_DMSO_B	Mo_DMSO_C	Mo_CHIR_A	Mo_CHIR_B	Mo_CHIR_C
IL10	30	3	25	19	8	39	601	413	639
CD163	3475	3002	5704	3923	1694	4859	5725	5098	11073
CCL2	24195	10772	15781	4733	5734	1279	146152	155507	78348
