# Supplementary material for: Reprogramming of GM-CSF-dependent alveolar macrophages through GSK3 activity modulation
Source: eLife. 2025 May 14;14:RP102659. doi: 10.7554/eLife.102659 (PMC12077879; doi:10.7554/eLife.102659)
Supplement: Figure 5—source data 7. [file elife-102659-fig5-data7.xlsx]

## Sheet: Figure 5I
Figure 5 - Source Data 7
Figure 5I
Densitometry of MAFB
	RASF-Mon-DMSO	RASF-Mon-CHIR
d1	1	1.80867
d2	1	1.48805
d3	1	0.910602
d4	1	3.96931
d5	1	1.87027
d6	1	2.79413
d7	1	3.16711
GraphPad Prism 9
Paired t test
P value	0.0186
P value summary	*
Significantly different (P < 0.05)?	Yes
One- or two-tailed P value?	Two-tailed
t, df	t=3.199, df=6
Number of pairs	7
How big is the difference?
Mean of differences (B - A)	1.287
SD of differences	1.064
SEM of differences	0.4023
95% confidence interval	0.3025 to 2.271
R squared (partial eta squared)	0.6304
