# Supplementary material for: Reprogramming of GM-CSF-dependent alveolar macrophages through GSK3 activity modulation
Source: eLife. 2025 May 14;14:RP102659. doi: 10.7554/eLife.102659 (PMC12077879; doi:10.7554/eLife.102659)
Supplement: Figure 5—source data 8. [file elife-102659-fig5-data8.xlsx]

## Sheet: Figure 5J
Figure 5 - Source Data 8
Figure 5J
Relative expression of IL10				Relative expression of LGMN
	RASF-Mon-DMSO	RASF-Mon-CHIR			RASF-Mon-DMSO	RASF-Mon-CHIR
d1	0.261	2.035		d1	18.69	69.21
d2	0.2603	2.498		d2	19.69	73.96
d3	0.3525	2.484		d3	19.08	85.71
d4	0.4438	4.729		d4	20.51	139
GraphPad Prism 9				GraphPad Prism 9
Paired t test				Paired t test
P value	0.0194			P value	0.0192
P value summary	*			P value summary	*
Significantly different (P < 0.05)?	Yes			Significantly different (P < 0.05)?	Yes
One- or two-tailed P value?	Two-tailed			One- or two-tailed P value?	Two-tailed
t, df	t=4.589, df=3			t, df	t=4.611, df=3
Number of pairs	4			Number of pairs	4
How big is the difference?				How big is the difference?
Mean of differences (B - A)	2.607			Mean of differences (B - A)	72.48
SD of differences	1.136			SD of differences	31.44
SEM of differences	0.5681			SEM of differences	15.72
95% confidence interval	0.7992 to 4.415			95% confidence interval	22.45 to 122.5
R squared (partial eta squared)	0.8753			R squared (partial eta squared)	0.8763
