# Supplementary material for: Reprogramming of GM-CSF-dependent alveolar macrophages through GSK3 activity modulation
Source: eLife. 2025 May 14;14:RP102659. doi: 10.7554/eLife.102659 (PMC12077879; doi:10.7554/eLife.102659)
Supplement: Figure 6—source data 3. [file elife-102659-fig6-data3.xlsx]

## Sheet: Figure 6G
Figure 6 - Source Data 3
Figure 6G
Quantification of LGMN				Quantification of CCL2				Quantification of IL-10				Quantification of Activin A
	DMSO-AMO	CHIR-AMO			DMSO-AMO	CHIR-AMO			DMSO-AMO	CHIR-AMO			DMSO-AMO	CHIR-AMO
d1	482.7	3885		d1	1580.7	8767.6		d1	5.8	9.3		d1	111.3	92.2
d2	177.6	997.6		d2	2285.2	8939.8		d2	5.1	6.5		d2	115.2	92.7
d3	277.6	444.2		d3	121.6	201.2		d3	2.6	2		d3	34.9	31.3
GraphPad Prism 9				GraphPad Prism 9				GraphPad Prism 9				GraphPad Prism 9
Paired t test				Paired t test				Paired t test				Paired t test
P value	0.2768			P value	0.1794			P value	0.3496			P value	0.1223
P value summary	ns			P value summary	ns			P value summary	ns			P value summary	ns
Significantly different (P < 0.05)?	No			Significantly different (P < 0.05)?	No			Significantly different (P < 0.05)?	No			Significantly different (P < 0.05)?	No
One- or two-tailed P value?	Two-tailed			One- or two-tailed P value?	Two-tailed			One- or two-tailed P value?	Two-tailed			One- or two-tailed P value?	Two-tailed
t, df	t=1.481, df=2			t, df	t=2.030, df=2			t, df	t=1.211, df=2			t, df	t=2.590, df=2
Number of pairs	3			Number of pairs	3			Number of pairs	3			Number of pairs	3
How big is the difference?				How big is the difference?				How big is the difference?				How big is the difference?
Mean of differences (B - A)	1463			Mean of differences (B - A)	4640			Mean of differences (B - A)	1.433			Mean of differences (B - A)	-15.07
SD of differences	1711			SD of differences	3959			SD of differences	2.05			SD of differences	10.07
SEM of differences	987.8			SEM of differences	2286			SEM of differences	1.184			SEM of differences	5.817
95% confidence interval	-2787 to 5713			95% confidence interval	-5194 to 14474			95% confidence interval	-3.660 to 6.526			95% confidence interval	-40.09 to 9.961
R squared (partial eta squared)	0.523			R squared (partial eta squared)	0.6733			R squared (partial eta squared)	0.423			R squared (partial eta squared)	0.7704
