# Supplementary material for: Reprogramming of GM-CSF-dependent alveolar macrophages through GSK3 activity modulation
Source: eLife. 2025 May 14;14:RP102659. doi: 10.7554/eLife.102659 (PMC12077879; doi:10.7554/eLife.102659)
Supplement: Figure 6—source data 4. [file elife-102659-fig6-data4.xlsx]

## Sheet: Figure 6H
Figure 6 - Source Data 4
Figure 6H
MFI of pGSK3β S9 in CD68 macrophages		MFI of pGSK3α S21 in CD68 macrophages		MFI of MAFB in CD68 macrophages		MFI of CD163 in CD68 macrophages			MFI of pGSK3β S9 in CD68 macrophages
Control	COVID-19	Control	COVID-19	Control	COVID-19	Control	COVID-19		Unpaired t test
44	17	76	68	57	17	24	123		P value	<0.0001
29	31	35	59	37	38	59	150		P value summary	****
57	43	49	61	42	66	24	79		Significantly different (P < 0.05)?	Yes
42	39	24	65	52	51	149	108		One- or two-tailed P value?	Two-tailed
26	38	29	33	76	63	160	41		t, df	t=27.97, df=1618
33	35	84	75	49	27	157	129
53	42	44	66	23	79	97	109		How big is the difference?
57	34	13	48	49	78	173	85		Mean of column A	37.64
40	62	61	72	28	46	163	135		Mean of column C	76.28
43	24	60	83	47	33	107	168		Difference between means (C - A) ± SEM	38.64 ± 1.381
49	83	38	85	44	97	109	104		95% confidence interval	35.93 to 41.35
63	35	48	103	47	36	75	166		R squared (eta squared)	0.3259
49	35	80	105	35	49	56	92
48	96	46	88	67	84	147	26		MFI of pGSK3α S21 in CD68 macrophages
38	40	54	44	51	86	163	104		Unpaired t test
39	38	61	109	49	44	66	102		P value	<0.0001
82	28	71	170	55	57	131	123		P value summary	****
41	43	96	94	46	88	143	114		Significantly different (P < 0.05)?	Yes
44	24	29	112	47	69	96	131		One- or two-tailed P value?	Two-tailed
48	39	53	149	43	64	28	152		t, df	t=25.74, df=1033
65	61	89	178	65	85	200	179
53	36	77	125	74	61	55	200		How big is the difference?
56	43	47	136	38	101	58	190		Mean of column E	39.11
41	63	80	199	40	95	199	194		Mean of column G	89.91
35	33	72	68	34	73	46	69		Difference between means (G - E) ± SEM	50.79 ± 1.974
21	47	87	110	51	151	59	170		95% confidence interval	46.92 to 54.67
23	31	103	113	47	99	89	128		R squared (eta squared)	0.3907
44	31	49	83	52	85	99	143
36	52	75	93	61	51	120	148		MFI of MAFB in CD68 macrophages
47	55	61	67	31	68	184	134		Unpaired t test
28	42	71	168	70	43	162	208		P value	<0.0001
25	41	79	143	34	79	69	145		P value summary	****
28	33	28	78	58	70	67	132		Significantly different (P < 0.05)?	Yes
47	21	42	128	74	90	48	126		One- or two-tailed P value?	Two-tailed
42	25	58	137	41	72	62	139		t, df	t=27.58, df=1373
25	25	62	121	46	52	38	58
24	21	66	108	51	81	99	178		How big is the difference?
72	39	26	118	71	70	140	126		Mean of column I	35.96
48	45	49	184	32	72	16	174		Mean of column K	80.35
63	26	84	102	91	68	63	68		Difference between means (K - I) ± SEM	44.39 ± 1.609
44	26	25	114	70	91	129	71		95% confidence interval	41.23 to 47.55
43	28	34	77	22	93	32	78		R squared (eta squared)	0.3565
33	26	25	81	64	60	90	97
53	34	79	98	33	99	162	140		MFI of CD163 in CD68 macrophages
31	76	49	116	65	57	74	64		Unpaired t test
64	26	65	155	51	84	110	160		P value	<0.0001
38	24	57	113	59	89	103	135		P value summary	****
53	29	32	141	34	100	112	148		Significantly different (P < 0.05)?	Yes
71	30	79	99	54	76	130	112		One- or two-tailed P value?	Two-tailed
35	18	57	110	44	98	126	65		t, df	t=17.70, df=955
41	42	33	71	68	90	53	58
56	27	93	92	42	100	34	233		How big is the difference?
25	18	18	74	75	60	50	44		Mean of column M	72.44
31	42	32	76	77	70	41	221		Mean of column O	130.6
26	29	22	71	57	66	30	97		Difference between means (O - M) ± SEM	58.18 ± 3.286
39	35	55	99	56	94	35	33		95% confidence interval	51.73 to 64.63
25	19	116	120	51	100	54	107		R squared (eta squared)	0.2471
46	46	38	125	57	98	74	131
25	27	45	111	68	83	39	82
39	32	70	150	53	128	30	194
30	31	24	159	49	81	31	39
39	51	66	100	46	111	44	101
26	23	40	122	40	106	30	127
31	29	34	128	57	90	121	151
28	23	45	161	40	33	97	78
36	30	41	137	38	104	145	127
30	27	63	59	57	97	85	101
45	28	73	142	52	46	104	168
31	24	67	86	51	70	57	141
33	23	60	106	38	44	103	112
36	29	59	69	49	124	49	124
23	28	59	54	36	79	38	181
28	29	68	86	33	103	91	170
24	33	43	47	40	75	60	184
39	22	41	34	35	99	19	192
33	23	59	52	45	76	57	235
32	22	59	40	46	148	48	110
34	24	23	69	19	38	90	68
37	37	35	12	40	117	32	104
28	43	79	46	43	78	52	210
41	46	32	40	32	130	41	147
16	35	35	95	44	79	24	212
58	28	29	42	33	110	48	87
36	28	54	123	41	88	24	214
24	43	46	108	25	76	76	161
27	31	46	82	53	52	60	182
34	24	41	133	56	82	61	172
36	46	26	67	34	50	60	207
40	38	48	184	47	115	42	199
38	48	21	62	44	58	69	207
38	39	60	117	53	98	50	197
22	30	19	78	27	56	28	198
26	40	42	121	30	68	98	173
17	82	26	78	38	65	42	144
39	32	45	67	50	65	16	217
26	30	42	103	55	126	74	187
24	33	37	80	39	128	79	105
25	34	32	142	60	59	40	147
28	32	33	39	46	93	26	174
24	31	23	52	48	46	14	116
29	33	33	101	38	43	50	112
32	29	67	100	51	105	48	83
26	52	75	71	35	82	22	84
17	36	28	84	67	18	30	60
36	87	45	86	36	55	50	219
36	43	33	67	34	22	26	111
43	57	21	118	62	39	49	11
40	35	33	63	31	63	111	193
29	39	47	32	40	43	39	206
26	33	59	40	62	52	85	110
22	47	35	112	46	37	11	166
46	42	69	105	41	46	21	191
39	41	27	60	50	34	66	176
37	47	18	38	56	32	32	159
36	24	16	66	41	19	54	124
39	33	40	65	68	25	11	139
32	33	28	49	78	18	113	125
29	35	37	28	72	30	110	55
42	47	34	39	46	42	100	190
26	38	21	25	61	4	60	144
41	27	39	26	26	21	71	157
47	35	54	31	58	75	26	167
33	30	46	18	42	129	49	111
43	14	20	25	57	63	66	112
36	37	24	85	43	25	48	120
38	47	55	32	65	93	54	128
38	43	21	145	37	48	49	103
42	88	38	58	54	88	121	146
26	10	27	41	40	32	51	169
40	46	43	39	88	8	32	194
22	29	50	31	70	88	29	111
34	58	28	62	39	39	51	138
46	26	8	22	72	47	57	40
44	24	8	69	38	59	102	19
23	84	9	29	42	63	81	136
28	33	16	31	32	105	20	83
36	29	29	30	24	43	50	111
41	62	35	25	22	73	61	99
32	46	61	56	33	92	94	131
25	27	43	30	60	51	30	21
31	34	29	49	83	83	60	148
62	27	34	16	40	109	90	79
25	38	77	29	27	82	29	128
28	26	23	43	33	135	193	80
116	65	31	51	56	99	35	77
35	21	17	24	21	106	36	90
29	36	33	103	32	117	88	126
30	63	67	24	27	54	17	93
26	25	28	28	19	69	61	70
32	46	37	51	31	72	21	111
31	66	40	115	63	93	41	165
42	44	17	56	23	74	115	55
27	43	51	33	44	112	74	5
27	71	16	81	29	55	65	32
28	63	16	134	36	55	39	68
31	74	42	38	61	128	33	127
25	59	15	122	66	111	26	142
31	70	60	24	26	65	182	80
22	51	11	84	38	79	50	160
25	131	25	14	52	41	18	51
24	51	44	17	39	66	19	77
29	29	41	22	38	113	139	182
30	44	70	26	51	117	53	178
21	54	10	162	25	79	12	114
22	32	12	127	31	119	26	188
30	38	54	91	33	31	34	181
45	41	27	214	25	97	38	85
23	21	50	109	41	74	36	236
40	45	40	135	23	42	34	58
29	43	23	103	53	78	75	186
84	184	16	122	40	55	199	112
24	34	39	86	43	116	25	148
35	57	22	82	31	91	36	126
29	38	10	120	28	84	21	131
27	76	42	105	35	108	94	190
42	56	45	141	38	29	42	180
29	50	58	130	29	75	55	194
27	175	58	91	35	111	29	215
71	62	32	137	58	71	88	130
27	121	22	94	45	37	55	198
20	57	41	140	26	38	59	133
21	98	9	110	31	94	85	142
27	28	32	73	26	34	71	167
30	41	19	80	22	45	77	138
17	69	14	131	41	30	48	187
21	30	10	99	28	39	119	173
31	59	28	93	29	55	64	82
34	37	9	120	38	75	167	217
32	57	31	95	24	43	58	125
25	51	94	106	22	105	19	159
24	70	37	115	22	99	79	153
23	41	36	134	19	87	95	209
24	81	33	129	28	50	181	147
37	54	40	84	20	34	194	165
23	63	27	111	38	106	151	201
38	90	47	50	38	130	138	90
18	38	81	73	35	57	158	114
30	66	81	95	42	60	113	93
31	79	56	87	22	57	65	168
30	58	35	68	35	118	209	64
22	28	64	94	19	86	58	171
25	101	36	70	32	113	72	94
23	83	25	52	25	119	74	142
40	150	33	57	31	43	35	135
25	110	44	60	43	103	127	56
29	102	32	106	36	59	57	148
24	166	34	77	14	117	84	102
30	84	46	93	37	97	160	196
25	105	44	98	28	62	199	93
27	113	34	71	29	43	167	67
31	60	62	74	11	170	83	148
24	90	84	112	40	60	62	159
17	127	32	97	51	88	99	191
21	76	37	61	22	123	58	120
27	62	49	65	33	108	90	92
21	89	60	93	38	102	117	157
26	66	55	93	35	111	78	200
21	82	62	135	25	55	124	55
35	82	48	101	37	97	83	157
23	50	56	131	32	76	143	168
21	86	58	74	34	57	140	104
25	78	60	91	16	60	162	139
17	63	83	70	32	104	198	121
20	87	61	96	29	51	152	181
25	105	80	113	35	86	117	203
26	83	66	113	27	92	133	133
20	97	59	132	32	37	144	72
26	97	31	150	25	64	104	113
38	47	36	109	24	126	199	53
36	124	29	120	27	103	135	198
21	89	57	205	27	27	203	66
24	82	26	166	23	62	181	250
22	46	26	133	29	39	42	179
21	96	79	142	23	87	63	169
20	56	60	150	13	108	68	100
27	99	22	86	33	80	55	167
28	107	31	171	23	87	43	203
20	104	54	145	32	116	44	122
25	92	38	168	27	53	184	217
30	111	42	118	20	48	168	167
24	93	41	144	26	81	96	125
33	102	45	112	40	96	198	54
24	129	50	112	29	40	104	202
23	98	61	109	20	37	66	211
21	111	36	109	27	33	183	188
99	44	39	106	24	57	141	78
25	77	39	48	20	98	38	175
19	68	38	62	29	94	156	25
30	62	19	65	32	47	146	22
25	99	26	79	16	31	147	150
22	100	44	83	24	70	69	172
32	80	26	91	17	60	60	25
17	77	54	56	21	73	132	26
30	105	51	82	17	79	106	170
24	101	67	109	17	49	90	73
23	122	60	92	58	77	53	224
25	121	39	115	141	54	90	63
22	117	28	68	92	46	77	116
33	100	51	93	53	80	154	153
25	92	76	106	96	48	59	123
21	88	23	102	117	45	138	117
31	100	32	62	75	49	103	121
28	102	32	94	148	33	148	62
21	81	45	86	71	42	80	55
22	115	30	89	39	37	47	133
23	70	19	65	55	52	58	112
18	99	31	105	70	34	200	145
26	115	28	97	73	65	82	98
15	73	51	105	59	84	135	100
25	87	39	147	67	50	132	56
22	63	21	71	125	61	85	145
32	91	76	78	44	21	162	97
22	89	39	85	44	59	158	112
38	114	19	88	41	43	115	141
22	110	20	103	38	36	227	94
20	84	65	134	112	28	38	125
20	87	44	91	37	69	103	113
20	74	48	118	45	50	22	106
24	74	24	95	92	73	46	115
27	111	30	76	30	42	37	147
20	90	25	76	100	27	43	118
20	70	42	76	34	36	47	39
19	89	33	81	38	65	173	170
25	112	35	125	45	49	45	97
23	58	54	56	51	35	87	125
18	98	27	82	44	113	103	123
21	85	29	60	57	43	84	172
35	102	33		31	19	90
21	93	38		26	64	65
20	75	43		49	102	38
34	90	47		24	58	93
26	103	39		55	117	34
32	63	31		37	51	42
32	89	7		43	34	63
28	64	32		49	61	101
35	103	16		14	45	58
9	121	6		29	66	30
43	80	15		80	65	133
68	69	41		42	83	37
35	101	15		23	53	137
34	100	13		18	70	122
42	76	10		19	38	38
29	99	12		24	193	24
40	110	22		33	63	68
38	61	11		23	94	42
38	83	21		20	57	61
64	51	12		17	105	74
36	31	20		31	31	42
37	64	16		39	91	72
45	133	14		22	68	47
32	73	5		42	44	78
30	56	7		33	68	59
20	55	23		15	80	35
33	68	6		13	115	31
45	59	3		18	38	99
35	52	23		31	137	29
44	54	12		28	80	11
27	50	27		34	115	46
27	96	25		90	43	94
33	73	7		28	56	58
21	63	9		34	69	26
36	126	31		32	64	51
30	83	22		33	61	33
33	33	14		33	48	80
45	174	17		33	43	53
31	57	11		40	101	39
31	109	11		37	125	44
31	93	6		27	100	99
61	155	36		31	61	27
30	88	16		44	55	38
29	135	34		29	46	68
20	46	21		30	106	26
34	86	8		43	67	53
48	107	14		18	86	80
42	152	23		25	33	63
30	87	18		36	52	66
44	81	11		15	56	13
31	109	27		31	43	78
24	94	76		58	85	27
31	99	26		47	29	128
18	102	52		29	27	23
26	72	19		31	62	106
30	56	12		28	38	114
31	45	24		41	61	38
30	82	51		32	60	28
29	86	6		45	89	25
35	161	44		72	60	28
20	77	39		23	29	37
26	68	51		39	79	31
35	95	28		101	69	215
31	90	44		32	84	71
28	147	20		44	53	32
34	67	43		30	59	90
31	94	62		37	40	29
26	133	51		27	48	41
51	80	50		37	60	14
24	121	19		25	90	83
23	71	9		48	65	36
22	98	25		45	56	30
26	89	34		44	37	38
41	102	9		15	29	39
39	62	10		32	23	13
20	147	83		31	82	58
39	105	137		50	88	20
30	59	20		48	97	81
24	81	30		38	44	32
44	73	29		37	87	124
30	141	18		37	103	60
36	72	33		22	39	81
48	86	20		41	57	54
25	97	18		28	72	29
36	142	29		38	49	102
32	109	11		38	33	86
28	116	7		35	59	133
29	81	27		32	96	75
24	136	13		30	39	40
27	57	21		37	111	54
28	79	31		29	102	50
30	78	12		27	41	35
29	86	8		26	86	115
24	95	26		23	51	26
34	133	9		27	101	45
31	58	10		36	89	69
27	74	22		29	59	21
30	126	12		26	37	64
29	92	15		17	80	25
39	73	26		30	64	78
31	74	30		36	63	80
16	99	42		29	125	51
22	114	33		21	57	82
28	115	46		28	107	56
26	84	19		34	89	108
23	109	29		22	128	129
41	121	5		38	98	33
25	77	19		25	80	22
20	129	28		40	114	39
22	89	28		24	105	50
38	83	20		16	64	96
28	63	25		30	65	40
32	64	23		28	45	192
25	48	24		21	73	93
24	119	14		30	80	47
29	106	15		30	49	45
28	73	33		27	58	62
29	120	7		23	62	43
37	122	19		26	55	22
41	119	16		18	96	35
28	119	18		27	56	28
53	162	39		57	61	51
43	105	15		20	42	79
33	111	8		9	112	65
42	53	55		43	55	57
27	82	55		16	63	58
44	110	9		20	84	93
43	111	47		36	79	108
34	70	5		31	44	47
36	92	12		58	79	40
72	80	23		43	56	14
43	90	8		32	81	16
61	76	89		45	76	41
45	78	20		26	68	31
54	73	38		49	50	37
64	65	14		35	32	63
21	107	3		42	99	48
22	93	28		64	40	159
64	71	38		28	48	48
58	90	67		34	62	41
72	104	27		8	50	72
73	108	22		53	96	104
96	51	32		58	92	69
81	99	28		67	41	18
65	95	28		14	71	15
75	119	26		61	38	43
27	99	17		39	49	37
25	129	33		29	8	44
9	109	24		45	110	84
20	98	29		42	65	90
21	116	36		26	51	20
54	87	34		44	77	86
14	87	23		86	28	10
42	88	36		27	87	54
14	105	41		41	49	31
29	88	52		46	69	41
22	54	39		37	67	48
28	78	21		25	98	51
78	120	26		20	60	10
43	77	31		21	84	39
40	107	24		40	85	71
20	66	27		4	26	37
31	120	29		20	51	102
16	92	90		23	70	45
80	159	17		19	63	74
51	81	121		16	72	66
24	68	41		12	59	67
52	143	91		23	45	62
31	82	65		25	98	29
62	81	44		38	38	46
14	84	60		9	46	116
43	70	40		37	59	43
20	98	48		29	68	27
25	53	37		11	82	39
29	125	35		56	43	119
109	59	76		18	41	124
36	83	52		3	80	25
30	116	14		45	38	22
42	71	34		17	63	28
46	49	96		5	95	88
36	71	53		10	57	62
61	66	110		4	55	90
42	118	21		9	69	66
5	90	29		9	76	80
32	112	42		7	67	56
21	67	40		21	60	108
36	106	34		7	99	59
27	77	27		26	48	104
16	83	55		36	93	61
25	85	57		22	54	73
29	96	63		20	57	46
39	83	20		25	66	66
24	117	30		14	77	78
32	77	25		21	70	64
57	98	48		27	66	73
45	102	48		24	72	66
34	104	11		20	76	22
30	156	50		12	42	32
25	76	16		18	80	54
32	99	6		24	75	35
43	79	49		8	92	44
13	86	37		28	61	12
21	115	46		23	44	69
12	67	7		20	46	45
19	100	37		22	33	68
9	106	25		14	64	27
55	77	65		36	62	31
34	85	19		18	103	45
53	126	75		40	77	88
64	109	28		14	117	17
82	104	55		14	72	66
65	107	34		4	58	91
95	134	41		20	88	15
39	95	52		25	94	33
24	136	41		8	105	42
17	69	27		18	112	26
82	126	49		8	130	30
50	79	66		14	58	88
37	95	38		11	116	18
46	142	11		22	121	15
21	84	47		104	120	37
45	88	68		51	120	41
59	154	55		122	89	30
59	97	45		105	73	43
41	141	35		28	140	38
51	122	14		53	75	33
81	87	20		121	56	68
40	89	58		70	131	32
37	84	56		116	120	67
34	112	60		73	141	25
63	71	56		46	114	18
53	90	42		142	122	16
45	153	30		52	106	76
43	87	114		45	94	42
20	84	30		123	120	42
44	107	30		109	90	94
41	79	38		70	92	63
47	136	57		61	46	37
14	154	17		97	129	61
46	61	14		129	76	147
32	97	1		99	123	52
57	87	16		95	126	75
37	120	36		112	132	50
24	110	56		71	118	98
61	80	26		124	152	94
71	89	19		81	105	51
63	83	35		97	145	108
31	54	9		151	141	122
49	99	22		92	126	60
8	103	50		123	102	79
28	84	24		120	128	38
19	108	6		61	80	48
72	81	15		69	139	18
53	64	4		63	117	27
56	72	8		83	115	60
64	81	5		42	94	26
45	98	21		57	121	58
55	82	10		19	136	63
74	41	144		57	122	22
53	77	6		102	101	67
57	70	25		62	71	221
49	65	47		39	138	124
49	70	8		28	116	61
63	112	13		27	103	96
39	87	28		18	149	107
62	70	19		23	125	74
52	72	74		9	100	204
50	53	0.9341		16	123	123
54	97	30		23	111	143
57	128	38		26	126	70
66	77	8		32	94	143
61	98	2		25	139	97
38	164	9		26	135	57
76	88	3		25	110	154
25	140	10		19	133	80
55	84	6		31	109	175
47	96	10		24	69	72
57	149	63		33	156	88
100	162	24		8	81	69
45	133	69		26	105	140
74	113	32		8	101	79
44	100	10		11	105	100
29	118	18		9	176	128
57	116	26		32	131	90
58	145	14		27	84	91
64	51	3		25	104	134
51	74	6		25	104	135
60	72	9		27	114	89
67	48	51		24	109	168
32	7	19		21	116	29
70	58	21		11	122	90
22	48	24		18	199	60
53	97	4		9	83	38
55	81	13		26	87	92
62	119	21		25	132	37
71	21	52		22	112	114
72	68	20		21	158	145
61	111	16		18	102	131
52	94	3		33	137	116
70	75	32		17	110	76
45	106	9		24	79	47
37	46	17		25	104	152
34	112	24		23	111	102
26	52	13		8	126	62
52	74	43		36	66	134
48	62	85		16	106	81
62	79	10		15	99	178
30	108	12		12	93	91
69	73	3		19	255	90
83	34	42		20	42	120
57	52	32		18	92	109
69	59	34		28	135	81
93	58	30		23	43	87
40	84	43		25	52	64
42	78	6		20	60	56
58	54	18		36	167	85
40	126	13		23	169	90
41	107	30		33	158	52
12	81	17		31	168	98
37	114	9		36	70	87
30	116	16		26	95	70
36	109	8		13	96	135
76	75	17		14	128	95
79	71	14		9	135	82
62	107	16		28	79	66
55	104	6		9	107	60
24	85	5		22	130	107
23	86	16		20	79	49
33	98	30		16	114	31
40	88	15		29	114	117
33	98	12		18	127	34
29	93	13		21	102	57
40	80	29		2	83	103
32	59	25		11	93	89
36	116	66		24	159	75
59	92	38		15	76	60
48	119	50		30	86	61
87	159	61		27	122	63
46	121	66		16	92	31
37	33	54		19	139	86
45	144	66		21	157	62
33	73	45		17	161	123
	98	36		12	153	27
	95	50		28	162	40
	74	59		7	102	102
	146	47		9	82	40
	128	52		21	141	147
	74	38		17	62	55
	64	40		15	157	93
	111	49		26	105	54
	99	75		16	126	57
	65	65		16	186	113
	115	58		10	128	41
	94	34		27	168	61
	104	52		12	205	23
	81	39		31	135	30
	72	62		19	185	30
	80	48		21	185	32
	55	31		18	163	69
	116	47		25	175	43
	84	52		11	44	41
	104	46		18	71	46
	76	65		5	76	52
	104	49		12	65	52
	87	56		17	58	46
	112	61		16		21
	86	62		4		53
	88	45		7		82
	70	68		19		25
	121	50		9		19
	78	19		8		67
	110	24		15		27
	76	67		15		11
	69	61		12		27
	113	56		15		20
	114	94		8		59
	15	54		16		36
	96	31		26		18
	95	58		9		36
	93	45		16		40
	94	36		4		26
	78	32		4		27
	44	66		21		22
	36	37		6
	76	53		10
	68	47		35
	48	88		48
	130	26		35
	22	37		73
	60	61		5
	87	53		13
	107	84		10
	58	55		23
	39	39		19
	47	63		18
	67	86		9
	47	66		7
	51	46		7
	68	31		19
	86	58		28
	137	31		18
	40	48		30
	62	65		17
	75	39		25
	129	43		21
	100	113		12
	114	62		11
	60	27		29
	73	23		18
	18	64		17
	95	40		14
	119	32		18
	60	50		7
	57	63		2
	8	21		11
	153	55		14
	103	84		11
	109	33		18
	80	66		21
	90	89		11
	54	65		18
	88	31		5
	64	70		11
	62	72		10
	83	98		32
	117	37		13
	89	65		2
	54	68		9
	118	51		24
	52	31		2
	56	82		13
	49	75		12
	44	70		14
	56	67		9
	113	22		21
	65	58		1
	70	126
	89	73
	81	42
	61	37
	65	33
	64	63
	66	78
	57	83
	45	36
	62	34
	61	46
	64	49
	66	43
	109	119
	72	60
	60	48
	30	71
	63	71
	54	73
	104	72
	31	76
	94	56
	38	95
	90	15
	65	45
	70
	57
	34
	115
	77
	93
	58
	75
	48
	8
	85
	42
	66
	21
	15
	13
	34
	50
	14
70	75
45	106
37	46
34	112
26	52
52	74
48	62
62	79
30	108
69	73
83	34
57	52
69	59
93	58
40	84
42	78
58	54
40	126
41	107
12	81
37	114
30	116
36	109
76	75
79	71
62	107
55	104
24	85
23	86
33	98
40	88
33	98
29	93
40	80
32	59
36	116
59	92
48	119
87	159
46	121
37	33
45	144
33	73
	98
	95
	74
	146
	128
	74
	64
	111
	99
	65
	115
	94
	104
	81
	72
	80
	55
	116
	84
	104
	76
	104
	87
	112
	86
	88
	70
	121
	78
	110
	76
	69
	113
	114
	15
	96
	95
	93
	94
	78
	44
	36
	76
	68
	48
	130
	22
	60
	87
	107
	58
	39
	47
	67
	47
	51
	68
	86
	137
	40
	62
	75
	129
	100
	114
	60
	73
	18
	95
	119
	60
	57
	8
	153
	103
	109
	80
	90
	54
	88
	64
	62
	83
	117
	89
	54
	118
	52
	56
	49
	44
	56
	113
	65
	70
	89
	81
	61
	65
	64
	66
	57
	45
	62
	61
	64
	66
	109
	72
	60
	30
	63
	54
	104
	31
	94
	38
	90
	65
	70
	57
	34
	115
	77
	93
	58
	75
	48
	8
	85
	42
	66
	21
	15
	13
	34
	50
	14
