# Supplementary material for: Reprogramming of GM-CSF-dependent alveolar macrophages through GSK3 activity modulation
Source: eLife. 2025 May 14;14:RP102659. doi: 10.7554/eLife.102659 (PMC12077879; doi:10.7554/eLife.102659)
Supplement: Supplementary file 1. [file elife-102659-supp1.xlsx]

## Sheet: Table S1
		Supplementary Table S1. Transcriptional datasets used in the present study
	Reference	Grant et al Nature 590:635, 2021						Liao et al Nat Med 26:842, 2020				Wendisch et al Cell 184:6243, 2021						González-Domínguez et al J Immunol 196:1327, 2016		González de la Aleja et al Front Immunol 13:835478. 2022; Muller et al Int J Mol Sci 24:9461, 2023				Mulder et al Immunity 54:1883-1900, 2021																	Simón-Fuentes et al JCI Insight 8:e172862, 2023		Simón-Fuentes et al JCI Insight 8:e172862, 2023		This manuscript		This manuscript		Li et al Life Sci Alliance 5:e202201458, 2022
	Repository	GSE155249						GSE145926				EGAS00001005634						GSE68061		GSE188278				https://gustaveroussy.github.io/FG-Lab/.																	GSE155719		GSE190589		GSE256208		GSE262463		GSE193782
	Name	MoAM1	MoAM2	MoAM3	MoAM4	TRAM1	TRAM2	FCN1+ MØ	FCN1lo SPP1+ MØ	SPP1+ MØ	FABP4+ MØ	Monocytes	Monocyte/MØ	CD163+/LGMN+ MØ	AMØ1	AMØ2	Proliferating MØ	M-MØ-specific	GM-MØ-specific	TOP 200 Genes DOWN ONLY during Mo to GM-MØ	TOP 200 Genes DOWN ONLY during Mo to M-MØ	TOP 200 Genes UP ONLY during Mo to GM-MØ	TOP 200 Genes UP ONLY during Mo to M-MØ	Cluster 1	Cluster 2	Cluster 3	Cluster 4	Cluster 5	Cluster 6	Cluster 7	Cluster 8	Cluster 9	Cluster 10	Cluster 11	Cluster 12	Cluster 13	Cluster 14	Cluster 15	Cluster 16	Cluster 17	MAFB-dependent	MAFB-inhibited	MAFB-bound 75-geneset	MAFB-bound 318-geneset	Upregulated CHIR-GM-MØ	Downregulated CHIR-GM-MØ	Upregulated CHIR-AMØ	Downregulated AMØ	AMØ
	Genes	ACSL1	ACSL1	ABCA1	AGTRAP	ABCG1	ABCG1	S100A12	AC015912.3	A2M	AC020656.1	AC245128.3	ACSL4	A2M	ABCC3	AC026369.3	AC084033.3	ABLIM2	ABCA6	TTN	ADAM19	AQP3	SELENOP	LST1	SLC40A1	APOC1	CXCL10	CD52	CXCL10	RGS1	S100A8	CCL5	STMN1	MT1G	HSPA1B	IGFBP7	FCER1A	G0S2	C1QC	HBB	A2M	AATBC	ABTB1	ABTB1	12268375	2001-03-01	NOTUM	CFP	FABP4
		ANKRD22	ADAP2	ABHD12	AIF1	ABHD5	ACOT2	S100A8	ANKRD22	ABCA1	AC026369.3	ACTB	ACTR2	ABCA1	ABCG1	ACO1	ACAT2	ABLIM3	ACTA2	PRLR	SLC2A1	STAC	FCGBP	FCGR3A	RNASE1	APOE	ISG15	S100A4	CXCL9	HLA-DPB1	S100A9	IL32	HIST1H4C	MT1X	HSPH1	CXCL14	CLEC10A	CCL20	C1QB	SLC40A1	AATK	ABCC3	ADGRE1	ADGRE1	AATK	2002-03-01	GCSAML	IGSF8	RBP4
		ANXA5	AIF1	ACP2	ANXA2	AC026369.3	ACP5	APOBEC3A	ANPEP	ACP2	ACP5	ACTG1	AIF1	ABCC5	ABCG2	ACOT7	ACOT7	ADA	ADAM12	NCF1B	LGALS2	CD1E	IGF1	IFITM2	LGMN	ACP5	IFIT1	PLAC8	GBP1	HLA-DRB1	S100A12	NKG7	TUBB	MT1E	HSPA6	CALD1	CD1C	IL1B	APOE	HBA2	ABCC5	ABCE1	ADRB2	ADRB2	ABCB4	2003-09-01	AXIN2	PNPLA2	SERPING1
		APOBEC3A	ANKRD22	ADAP2	ANXA5	ACOT2	ACSL1	IL1RN	ATP6V0C	ADAM8	ALDH2	ADAM19	ALCAM	ACP2	ABHD5	ADTRP	ACTL6A	ADORA3	AK3L2	HS3ST1	LINC00211	LINC02345	CD163L1	RHOC	C1QA	SPP1	CCL8	S100A6	IDO1	CD74	VCAN	GNLY	H2AFZ	MT2A	DNAJB1	SPARCL1	CD1E	IL1RN	FUCA1	CCL18	ABCD4	ABCG1	AIF1	AFF1	ABCB5	2004-09-01	NEXMIF	TLR7	ITIH5
		AQP9	ANXA5	AIF1	AP2S1	ACP5	ACTN1	S100A9	ATP6V1G1	ANXA4	ALOX5	AIF1	ANKRD22	ADA2	ABHD14A	AKR1C2	ACYP1	AHRR	ALDH1A2	IRAG1	CD69	CD1B	LGMN	CD52	C1QB	CTSD	IFIT2	CFP	CXCL11	HLA-DQA1	S100A6	KLRB1	UBE2C	MT1M	HSPA1A	MGP	HLA-DQB1	CXCL2	C1QA	NDUFA4	ABHD3	ABHD2	AMPD3	AHNAK	ABHD12	2005-09-01	MMP8	TMEM14A	PCOLCE2
		ATF3	APOBEC3A	ANXA2	APLP2	ADAMTSL4	ADTRP	CCL3L1	BAG3	ARL4C	ALOX5AP	AL034397.3	APP	ADAM9	AC011899.2	AKR1C3	ALDH7A1	AIG1	ALOX5AP	ARL4C	OLR1	IL7R	CD28	S100A4	STAB1	GPNMB	IFIT3	LST1	STAT1	HLA-DPA1	MNDA	CD3D	TUBA1B	MT1F	BAG3	SLPI	HLA-DPB1	SOD2	DNASE1L3	LGALS3	ABHD12	ABHD5	AP2A2	AIF1	ABHD3	2011-09-01	CYP3A7	LMO2	SCD
		ATF5	ATF5	ANXA5	APOBEC3A	AGPAT2	AGRP	TNFSF10	BCL2A1	ATOX1	APOC1	APOBEC3A	APRT	ADAMDEC1	AC026369.3	ALDH1A1	AMOTL1	ALK	ANKRD38	PGGHG	TMEM52B	FLT1	TMEM37	CDKN1C	DAB2	FABP5	RSAD2	SERPINA1	IL4I1	HLA-DRA	FOS	GZMA	TOP2A	APOC1	DNAJA4	COL3A1	HLA-DQA1	EREG	HLA-DPA1	FTL	ABL1	ACO1	ARMC9	ALOX5AP	ABLIM3	107983947	MAT1A	BCKDHA	NUPR1
		ATOX1	ATG3	AP1B1	AQP9	AGRP	AKR1B1	CXCL11	C15orf48	ATP2A2	APOC2	ARHGDIB	AQP9	ADAP2	ACACB	ALOX5	ANAPC11	ARL4C	ANKRD47	SECTM1	BX640514.2	FN1	LGI2	IFITM3	F13A1	LGALS3	TNFSF10	SH3BGRL3	GBP5	HLA-DQB1	CSTA	CD7	HMGB2	CTSD	ZFAND2A	COL1A2	GPR183	CXCL3	ACP5	CAPZB	ABLIM3	ACP5	ATRN	AMN1	ACCS	107987428	XCR1	BTN3A3	GPD1
		ATP2B1	ATOX1	AP2A2	ARHGAP18	AKR1B1	ALAS1	CXCL10	CALHM6	ATP6V0C	APOE	ASGR2	ARPC5	ADM	ACO1	AMOTL1	ANKRD9	ASGR2	AQP3	LRRC4	SYTL1	HPGD	F2RL3	NAP1L1	A2M	CTSB	ISG20	CORO1A	WARS	CLEC10A	S100A4	CD2	TK1	LGMN	HSP90AA1	SPARC	HLA-DRB5	TIMP1	RNASE1	CALM2	ABTB1	ACTN1	C5AR2	AMPD3	ADAM8	A4GALT	SGPP2	PLCL2	CFD
		ATP6V1B2	BAX	AP2M1	ARPC3	AKR1C3	ALDH1A1	FCN1	CALM1	B3GNT2	ATP1B1	BACH1	ATP6V0D1	ADORA3	ACOT2	ANOS1	ANLN	ATHL1	AR	ADGRE1	BCL2A1	GPD1	GSDMA	SERPINA1	MAF	PLA2G7	CCL2	AP1S2	MMP9	HES1	LYZ	CD3E	HMGN2	CTSB	HSPB1	DCN	HLA-DRB1	BCL2A1	HLA-DRB1	FUCA1	ACE	ADAMTSL4	CAPZB	ANGEL1	ADAM9	ABAT	HAMP	EBPL	LINC02154
		ATP6V1F	BCL2A1	AP2S1	ASGR1	ALDH1A1	ALDH2	ISG20	CCL2	BASP1	C1QA	C3AR1	ATP6V1G1	AHNAK	ACOT4	AOC3	ANP32B	C1QC	BHLHB3	MARCKS	ARMH1	GALNT12	FOLR2	COTL1	HES1	CD63	IFI44L	LIMD2	CD40	HLA-DRB5	SELL	GZMB	PTTG1	GLUL	HSPE1	TIMP3	PPA1	NFKBIA	CD74	ATOX1	ACP2	ADGRE5	CARD6	AOAH	ADAP2	ABCA2	CCL8	ACVRL1	APOC1
		ATP6V1G1	BLVRA	APLP2	ATOX1	ALDH2	ALOX5	CCL4L2	CCL3	C1orf54	C1QB	CCDC69	BASP1	AMDHD2	ACP5	AQP3	ANP32E	C2	C10orf10	IL10	NFE2	MMP12	COL23A1	STXBP2	FUCA1	CD9	APOBEC3A	COTL1	PPA1	HLA-DMA	AP1S2	LTB	CDK1	CXCL1	HSPD1	CAV1	DUSP2	SERPINB9	HLA-DQA1	TUBB	ACSL1	ADO	CCL2	AOX1	ADARB1	ABCA3	CCL2	TNFSF13B	MME
		BACH1	BLVRB	APOC1	ATP5F1E	ALDOA	ALOX5AP	IDO1	CCL3L1	C1QC	CALM2	CCR2	CALM1	AP1B1	ACVRL1	ARHGAP6	APOLD1	C2orf32	C19orf59	LINC00921	KCNJ15	KRT79	IGFBP4	LIMD2	IGF1	PLD3	IFITM3	IFITM2	SLAMF7	GPR183	RBP7	CST7	MKI67	SDS	IER5	COL1A1	PKIB	CCL3	PLD3	AKR1B1	ACSL4	AGO1	CD163	AP2A2	ADCK2	ABCB9	ADORA3	SUN2	CD52
		BCL2A1	BRI3	APOE	ATP6V0B	ALOX5	ANXA2	ISG15	CCL4	CALR	CD9	CD14	CCL2	AP2A2	ADTRP	ARHGEF35	ARHGAP11A	C2orf55	C1RL	DUSP4	CCND2	AC022509.2	PDGFB	CD79B	EGR1	LIPA	IFI6	STXBP2	ANKRD22	ZNF331	MALAT1	CD69	TYMS	FUCA1	FKBP4	CTGF	CD74	PTGS2	CD63	FABP5	ACTG1	AGO4	CMKLR1	APBB1IP	ADCY1	ABCC3	CST7	SOX4	CES1
		BCL3	BST2	ARHGAP18	ATP6V0C	ALOX5AP	ANXA5	RSAD2	CCL4L2	CCL18	CD52	CD55	CCR2	APOE	AGRP	ATP1B1	ASF1B	C5orf29	C1S	EDNRB	AL627309.6	AKAP5	HTR2B	ICAM3	HSPA1A	LGMN	GBP1	EMP3	SOD2	C1QC	STXBP2	PRF1	HMGB1	FTL	TNFSF14	KRT8	HLA-DRA	CCL2	CTSC	STMN1	ADA	AGPAT5	CNDP2	ARHGAP22	ADCY3	ABCC6	IL10	PRMT6	INHBA
		BRI3	C1orf162	ASAH1	ATP6V0D1	AMIGO2	APIP	IFITM2	CCL7	CD68	CES1	CD93	CCR5	ARL4C	AKAP5	ATP10A	ASPM	C6orf85	C7orf29	E2F3-IT1	CLSTN3	PHLDA3	AC110995.1	KLF2	C1QC	TREM2	CXCL11	TSPO	PTGDS	DUSP2	RPL39	IL7R	PCNA	LGALS3	G0S2	TM4SF1	CST7	PLAUR	HLA-DRB5	VAMP8	ADAM9	AGTRAP	CSF1R	ARMC9	ADGRE1	ABCG1	RFX4	INSR	AC026369.3
		C1orf122	C3AR1	ATOX1	ATP6V1F	APOC1	APOC1	CCL4	CCL8	CD72	CFD	CD300E	CD44	ASAH1	AKR1C3	AXL	ASRGL1	C10orf116	C9orf52	ITGA9	AQP9	AC015660.2	OLFML3	LTB	CCL3	MMP9	HERC5	KLF2	VAMP5	C1QA	CSF3R	GZMH	RRM2	GPNMB	APOBEC3A	CLU	LGALS2	TNIP3	HLA-DQA2	IFI27	ADAP2	AKR1C3	CTSL	ATG16L1	ADM	ABHD1	CXCR1	SLC46A3	AF127936.2
		C3AR1	C15orf48	ATP5F1E	BCL2A1	APOE	APOE	IFIT2	CD163	CD84	COX7C	CDA	CD93	ASPH	AL035446.1	B3GNT7	ATAD2	C13orf31	C9orf57	S1PR1	CLEC4D	GJB2	CCDC152	CORO1A	NR4A2	SDS	LY6E	IFITM3	TAP1	HSPA1A	H1FX	KLRD1	BIRC5	ABCA1	CACYBP	KRT18	HLA-DPA1	CCL4	PTGDS	HSPA8	ADCY1	ALDH2	DEF6	ATP5PO	ADM2	ABHD12B	SDS	PIK3IP1	CPE
		C5AR1	CALHM6	ATP5PD	BLVRB	ASAH1	ARRDC4	DUSP6	CD300E	CD163	CRIP1	CEBPD	CD300E	ATP2A2	AL365361.1	BHLHE41	ATAD5	C20orf26	CA12	CD38	AMZ1	CCL17	OLFML2B	CD37	CCL4	C1QB	IL1RN	IFI30	CCL8	IL1B	MGST1	CD3G	DUT	HMOX1	NR4A1	MYL9	CXCR4	SLC2A3	HLA-DRA	YWHAH	ADGRE1	ALDH3A2	DEPTOR	ATRN	ADORA3	ABHD5	LRRC4	GATAD2B	PPIC
		C15orf48	CALM3	ATP6V0B	BRI3	ATP1B1	ASAH1	NCF1	CTSB	CD276	CSTA	CFP	CEP170	ATP6V0A1	ALAS1	C1QB	AURKA	CACNA2D3	CAMP	IL6R-AS1	PADI2	MGAT3	LPAR5	POU2F2	CTSC	CCL18	IFI44	TXNIP	TXN	CST3	TSPO	CTSW	NUSAP1	IL6	CHORDC1	EMP2	CST3	WTAP	CCL18	LDHB	ADI1	ALG3	EEPD1	AZIN2	ADTRP	ABI3	CFAP61	NIPAL3	TRHDE
		CCL2	CASP4	ATP6V1F	C1orf162	BCAP31	ATP1B1	GBP1	CTSL	CREG1	EIF3E	CKAP4	CLEC5A	ATP6V1B2	ALDH1A1	C1QC	AURKB	CADM1	CAPN11	STAB1	AL135818.1	PPBP	SLC46A1	TCF7L2	HSPA1B	RNASE1	PARP14	PRELID1	LAP3	NR4A2	METTL9	CXCL13	CENPF	YWHAH	BCL2A1	RGS5	HLA-DQB2	SOCS3	TMEM176B	PEBP1	ADIPOR1	ALOX5AP	FAM49A	BAHCC1	AFG1L	ABTB1	LYPD3	SMAD6	HP
		CCL3	CBR1	BAX	C4orf48	BHLHE41	ATP6AP1	WARS	CXCL8	CREM	FABP4	CLU	CLEC10A	ATP6V1C1	ALDH2	CARD16	BARD1	CCL2	CCDC102B	AL603783.1	S1PR4	APOL4	CCL2	LYN	FOSB	NUPR1	OASL	LTA4H	PSME2	HERPUD1	ANXA1	LCK	KPNA2	SLC40A1	CLK1	TAGLN	RPL4	CD300E	LIPA	NUPR1	ADORA3	ALOX15B	GAS6	BCAT1	AGAP11	ABTB2	TCF7	ALDH7A1	MLPH
		CCL3L1	CCL2	BLVRB	C15orf48	C1orf162	ATP6V0C	IFIT3	CXCL10	CTSB	FBP1	CORO1A	CLU	BASP1	ALOX5AP	CD52	BCL2L12	CCL4	CCL17	AC012368.1	AC119396.1	FGD5	TNFRSF11A	TESC	RGS1	C1QC	CMPK2	RPL18A	GBP4	ATF3	DUSP1	GZMM	CENPM	PSAP	DNAJA1	IGFBP4	IL1B	TNFAIP3	PRDX1	DAB2	ADPGK	ANAPC1	GFRA2	BID	AGAP5	ACAD8	GCNT3	GLIPR1	TREM1
		CCL4	CCL7	BMP2K	CALHM6	C1QA	AXL	NAMPT	DEFB1	CTSD	GCHFR	COTL1	CORO1A	BCAT1	AMIGO2	CD74	BIRC5	CCL8	CCL22	AC093525.10	MYRF	WFDC21P	AC131206.1	LRRC25	LMNA	FTL	RABGAP1L	FKBP1A	IRF1	C1QB	NCF1	ETS1	NUCKS1		IL1RN	CYR61	CD83	NAMPT	SERPINF1	AIF1	ADRB2	ANKRD13A	HECTD2	C10orf95	AHCY	ACKR3	C10orf95	METTL7A	C1QB
		CCL4L2	CCL8	BRI3	CALM1	C1QB	B2M	VCAN	DNAJA4	CTSL	HLA-DMA	CRISPLD2	CYBB	BLVRB	AMOTL1	CD81	BLM	CD28	CCND2	HMCN1	INHBA	TACSTD2	AL392172.1	PTPN6	ATF3	GM2A	OAS3	POU2F2	HLA-DRA	HLA-DMB	NEAT1	FYN	H2AFV		TRA2B	AGR2	EEF1B2	PPIF	FCGRT	SDCBP	AHR	ANXA6	HLA-E	C4BPA	AHRR	ACO1	ABCB5	CLSTN1	TGM2
		CCL7	CCR1	C1orf162	CAPG	C1QC	BCAP31	SERPINB9	DNAJB1	CTSZ	HLA-DPA1	CSF3R	DDX5	BMP2K	ANOS1	CDC42BPB	BRCA1	CD38	CCR2	PTGIR	PLIN4	ARHGEF28	LACC1	CFP	SLCO2B1	PRDX1	SAMD9L	S100A10	HLA-DQA1	CD83	TKT	CD8A	DEK		DNAJB4	C1S	RPLP0	THBS1	ITM2B	TMSB4X	AIF1	AP5B1	IFNGR2	C5AR2	AIFM2	ACOT7	MRO	HOXB6	FTL
		CCL8	CD14	C1QA	CCL2	C9orf16	BCL2A1	CCL3	DUSP1	DCXR	HLA-DPB1	DSE	DDX21	C3AR1	ANXA11	CENPV	BRCA2	CD93	CD1B	GNG2	CCDC162P	DOCK3	AF127936.1	FGR	APOE	C1QA	EPSTI1	RHOC	LITAF	JUNB	SERPINA1	SPOCK2	RPA3		JUN	GNG11	RPL5	SRGN	HLA-DPB1	C1QC	AIFM1	APEX1	IGF1	CAHM	ALDH1L2	ACOX2	PKD1L3	RPH3AL	SLC19A3
		CCR1	CD63	C1QB	CCR1	CAT	BLVRA	IFIT1	DYNLT1	EMP1	HLA-DQA1	DUSP6	DNAJC8	C6orf62	AOC3	CES1	BTG3	CD163	CD1C	SEMA4C	MCEMP1	PARAL1	CTTNBP2	MALAT1	ARL4C	PSAP	IFI35	FGR	ATOX1	HSP90AA1	CFP	CD247	SMC4		PPIF	ID1	LMNA	GK	HLA-DQB1	CAPG	AKAP10	APOC1	IL10	CAMK2D	ALK	ACSM1	PRLR	ARHGAP21	ACO1
		CCRL2	CD84	C1QC	CD14	CCDC88A	BRI3	LILRA5	ELOC	FABP5	HLA-DQB1	EFHD2	DPYD	CADM1	APIP	CFD	BUB1	CD163L1	CD1E	CD93	MYO7B	SYNC	COBLL1	PTP4A2	DNASE1L3	DNASE1L3	IFI27	CD300E	CD74	HSPA8	EVI2B	ACAP1	MCM7		SLC20A1	TPM2	NDRG2	CD44	LGALS3	ATP6V1F	AKAP11	APOE	IL10RA	CAPZB	ALKBH7	ACTN1	GUCY1A2	CRACR2B	CA2
		CD14	CD163	CAPG	CD44	CD9	C1QA	H3F3B	EMP1	FAM20C	HLA-DRA	EGR1	DSE	CALM3	APOC1	CHDH	BUB1B	CD209	CD226	LINC02284	KRT80	IGFBP2	ARMC9	FAM110A	PLTP	CAPG	XAF1	PTP4A2	HLA-DRB1	LMNA	CDA	RORA	CDKN3		EREG	HOPX	RPL10A	OLR1	HLA-DMB	CLTA	AKR1A1	ARFIP1	IRF8	CARD6	ALOX15B	ACVRL1	CPN2	EPHB6	LSAMP
		CD44	CD300A	CCL2	CD63	CD52	C1QB	IFITM1	FKBP4	FNIP2	HLA-DRB1	EIF1	ELK3	CALU	APOE	CPE	BUB3	CD244	CD69	CT75	SERPINE1	CPE	INKA1	EVI2B	MS4A4A	CTSZ	STAT1	CD37	PLEK	CPVL	LGALS2	ITM2A	CKS2		TSPYL2	PDLIM1	RPS7	FTH1	LGMN	RPL15	ALDH1A1	ARL4C	ITGB5	CC2D1B	ALS2CL	ACY1	PDE4D	SSPN	MYO6
		CD48	CD300E	CCL18	CD68	CD68	C1QC	IFITM3	FNIP2	FPR3	HLA-DRB5	ELK3	EMP1	CANX	APOL4	CTSW	C1orf112	CFD	ChGn	ADGB	COL1A1	FBP1	AC103760.1	SPN	LIPA	A2M	RNF213	PTPN6	HAPLN3	CHMP1B	NUP214	CD27	TMEM106C		RGS2	PERP	RPS5	INHBA	AKR1B1	MYL12A	ALDH9A1	ARL8B	ITPR2	CCL2	AMACR	ADAM12	TMIGD3	SLC19A1	C1QA
		CD63	CDKN1A	CCR1	CD93	CD74	C3AR1	MX1	FOS	GALM	INHBA	FAU	EMP3	CCL2	AQP3	DNASE2B	C1QB	CFP	CHI3L2	LINC00472	PIM1	PCOLCE2	ITSN1	LY6E	MS4A7	FUCA1	VAMP5	APOBEC3A	BIRC3	NR4A3	DUSP6	CCL4	DTYMK		UBB	SPTBN1	EIF3L	MALAT1	FABP3	HNMT	ALDH16A1	ARRDC4	LAIR1	CD163	AMDHD2	ADAMTS13	WNT5A	UBA7	RND3
		CD83	CEBPD	CD14	CD163	CD81	C5AR1	IRF7	GADD45B	GM2A	JAML	FCN1	FAM49B	CCL13	ARHGEF28	DOK2	C4orf46	CMKLR1	CLDN1	AJ003147.3	S100P	NDRG2	KITLG	TKT	CCL18	OTOA	OAS1		TMEM176B	SGK1	CD37	RUNX3	RAN		INHBA	TPM1	RPL3	IER3	TREM2	SLC25A5	ALK	ASGR1	LGMN	CD27	ANGPTL4	ADAMTSL4	GAL3ST4	MSC	AOC3
		CD300E	CFL1	CD36	CD300E	CD151	CAPG	ZFP36	GBP5	GNS	LDHB	FGL2	FCGR2B	CCR1	ATL1	DST	C9orf40	COL23A1	CLDN14	MCC	DBN1	HSD11B1	KLHL13	DRAP1	PDK4	CREG1	IRF7		RARRES3	DNAJB1	TXNIP	CXCR4	TPX2		HSP90AB1	CTSK	RPS8	VEGFA	APOC1	OST4	AMPD3	ATF3	LTBP2	CD300LB	ANKAR	ADCY6	CRYBB1	PECAM1	C8B
		CDKN1A	CLIC1	CD63	CEBPB	CDC42EP3	CARD16	SLC25A37	GNG5	GPNMB	LST1	FOS	FCN1	CCR5	ATP1B1	ECSCR	C19orf48	CRHBP	CLEC12A	LINC00271	CD72	PKIA	GIMAP5	MYO1G	GPNMB	ATP6V1F	USP18		HLA-B	CXCR4	CTSS	IFITM1	PRC1		JUND	MMP9	RGS1	EHD1	VSIG4	UBB	ANKH	ATIC	MAEA	CD34	ANKH	ADGRA2	ARMCX5-GPRASP2	NATD1	CARD16
		CEBPB	CLTA	CD68	CEBPD	CEBPB	CCL18	PLEK	H3F3B	GPR137B	LTA4H	FPR1	GAS6	CD4	AVPI1	ENPP4	C21orf58	CRYBB1	CLIC3	HPSE	FOLR3	PDLIM4	ALK	RAP1B	GPR34	TMEM176B	OAS2		DNASE1L3	PRDM1	HMGB2	ISG20	RANBP1		SERPINH1	S100A16	FCGR2B	AQP9	HLA-DMA	COX8A	ANKRD12	ATP1B1	MAF	CDKN2AIP	ANXA6	ADGRD1	ALK	IKBKE	RSPO3
		CFL1	CLU	CD81	CFL1	CFD	CD9	GCH1	HIST1H2AC	GPR183	LYZ	FPR2	GNAQ	CD14	AXL	EPB41L4A	CALM2	CXCL2	CLU	AC103703.1	FAM83G	CH25H	STAB1	RAC2	CXCL12	GRN	EIF2AK2		ATF5	HSP90AB1	GCA	TNFRSF18	SIVA1		LDLR	CNN3	RPL7A	PFKFB3	LGALS3BP	CHCHD10	ANKRD52	ATP5MC3	MARCKS	CHD1	AP1B1	ADGRE3	ACP3	KSR1	GCHFR
		CFLAR	CMKLR1	CD84	CLEC5A	CITED2	CD63	HPSE	HMGA1	HAVCR2	MARCO	FYB1	GPR84	CD48	B3GNT7	EVL	CARHSP1	CXCL9	COBL	PID1	TRAF3IP2	HES2	TLR7	S100A6	ZNF331	CD59	TNFSF13B		APOL3		JUND	EVL	ZWINT		PPP1R15A	TSC22D1	INSIG1	CXCL5	MS4A4A	COX7C	ANKS1A	ATP6V1A	METTL7A	CLPB	AP1S2	ADGRE5	GPRC5B	BNIP3L	TNNI2
		CHMP4B	CREG1	CD163	CLEC7A	CLEC12A	CD68	SAT1	HSP90AA1	HIF1A	MCEMP1	GAPDH	H2AFY	CD84	BACE1	FABP4	CBR3	CXCL10	CREG2	AL050343.2	MTND3P12	SPN	CMBL	RPS19	ITM2B	ANXA2	DDX58		TNFSF10		CD52	IL2RB	GGH		AHSA1	ACTA2	PLD4	THBD	C2	FN1	ANO6	ATP6V1B2	MGAT5	CLRN3	AP2A2	ADGRG5	TFAP2C	JAML	KMO
		CSTB	CTSB	CDKN1A	CLU	COMT	CD74	CCL8	HSP90AB1	HMOX1	MGST3	GAPT	H3F3B	CD163	BCAR3	FAM89A	CBX3	CXCL12	CRIP1	TMEM202-AS1	COL27A1	GPR153	SYT1	PILRA	CTSB	PLTP	SSB		ENPP2		KLF6	CMC1	CENPW		SOD2	CRIP2	RPS23	IVNS1ABP	GPNMB	AP2S1	ANTXR1	BHLHE40	MMD	CMKLR1	AP2M1	ADGRL1	TBC1D3H	MICALL2	HPGD
		CTSB	CTSD	CEBPD	COTL1	CST3	CD81	HES4	HSPA1A	HSP90B1	MRC1	GBP1	HMGB1	CD180	BHLHE41	FFAR4	CBX5	CYP2U1	CRLF1	HOMER3-AS1	BPI	RAP1GAP	PCDH12	IFI30	DNAJB1	CYP27A1	WARS		IL7R		ASGR1	BCL11B	TUBB4B		CRYAB	TFPI	NR4A3	NLRP3	CTSD	COX5A	ANXA1	BNIP3L	MS4A6A	CNDP2	AP5Z1	ADO	DNAI3	DYRK1B	TYROBP
		CTSL	CTSL	CHCHD10	COX5B	CSTA	CD83	MX2	HSPA1B	IFI27	MSR1	GCA	HNRNPA1	CDV3	BSG	FHL1	CCDC14	DDIT4L	CSF1	AC138356.1	SYNJ2	GPC4	BNC2	SLC2A6	MS4A6A	SDC2	DYNLT1		TNFSF13B		RPS24	HOPX	IDH2		KLF2	EPAS1	RPS3	PNRC1	HLA-DQB2	NPL	ANXA4	BRWD3	NLN	CNOT2	APBA1	ADORA1	GRIP1	TLCD2	FAM3B
		CXCL2	CXCL10	CLTC	COX8A	CTSZ	CD151	MAFB	HSPA6	IFI30	NDUFA11	GLIPR1	HNRNPA2B1	CHST13	C1QA	FTH1	CCDC18	DEPDC6	CSRP2	AC090181.1	SEPTIN4	DKK2	WWP1	LYST	HSP90AA1	LAMP1	IFITM1		PLA2G7		FGR	SLC38A1	CCNB2		ZC3H12A	NNMT	RPL15	TNFAIP6	NUPR1	RHOA	AP1B1	BST1	NPL	COL14A1	APCDD1	ADRA2B	PKD2L1	S100A4	ATP1B1
		CXCL3	CYBA	CMKLR1	CSF1R	CXCL16	CDC42EP3	CCL2	HSPA8	IQGAP2	NDUFA13	GMFG	HNRNPDL	CLTC	C1QB	GABARAPL1	CCDC34	DLL1	CX3CL1	PTPRN2	PROC	TSKU	AC011337.1	SPI1	PRDM1	ASAH1	SAMD9		CTSH		LTA4H	IKZF3	PARP1		NEAT1	ATP1B1	SLC38A1	HIF1A	SERPING1	COX6C	AP2A2	BTG1	OLFML2B	CPEB3	APOPT1	AFAP1L1	CRHBP	GIMAP4	FAM89A
		CXCL8	DEFB1	COMT	CST3	CYB5A	CDCP1	DDX58	HSPB1	KLF6	NDUFB1	H3F3A	IER3	CMKLR1	C1QC	GALNT12	CCHCR1	EBI2	CYP27B1	AL365272.1	SLIT3	PCGF2	SLC18B1	CKB	NRP1	VAT1	GBP4		ICAM1		NRGN	ZFP36L2	AURKB		GADD45B	S100A13	LITAF	PLEK	GRN	UCP2	AP2M1	BZW1	PAX8-AS1	CRYGA	APPL2	AGFG2	GCSAM	GALK1	CD9
		CXCL10	DEK	COX5B	CSTB	CYB5R3	CES1	CCR1	HSPE1	LAG3	NDUFB8	H3F3B	KCNJ15	CPM	C9orf16	GAPLINC	CCNA2	EDG1	CYP4F22	GTF2IRD2B	FYN	HSPG2	LTC4S	VASP	GATM	TXN	MT2A		TMEM176A		LRRK2	PPP2R5C	SMC2		DNTTIP2	DLC1	RPL6	VCAN	CD59	AKR1A1	APH1A	BZW2	PDCD1LG2	CSF1R	ARG2	AGRN	IRX6	DUSP7	ACOT7
		CYBA	DNAJC15	COX7B	CTSA	CYP27A1	CFD	HERC5	HSPH1	LGMN	NUPR1	HCLS1	KCTD12	CREG1	CARS2	GLDN	CCNB1	EDNRB	DCLK2	PRR5L	ATG9B	MYO6	SCN1B	MTSS1	BTG2	CALR	LAP3		CCL18		LIMD2	TIGIT	CCNB1		TIMP1	COL6A3	RPS2	ATP13A3	CD9	CYB5A	APMAP	C5orf51	PPM1L	CSK	ARHGAP26	AGRP	DGKI	SLC12A6	PHLDA3
		CYSTM1	DRAP1	COX8A	CTSB	DECR1	COMT	FFAR2	IER3	LHFPL2	RBP4	HNRNPA2B1	LDLRAD3	CSF1R	CAT	GNG12	CCNB2	EGR1	DDEF2	CXCL9	AC083862.2	MOB3B	SERPINF1	NACA	PLD3	BCAP31	IL4I1		HLA-DPB1		AGTRAP	STK17A	TUBA1C		IL1B	IFI27	LTB	MARCKSL1	IGSF6	TXN	APPL2	C9orf139	PRDM1	CTLA4	ARHGEF40	AGTRAP	CCL7	KCNAB1	SELENOM
		DRAM1	DSE	CPM	CTSD	DOK2	CST3	NFKBIA	IFI6	LILRB4	RETN	HPSE	LIMS1	CTSB	CCL23	GPD1	CCNF	EGR3	DIRAS2	FAM177B	TRAF4	CLU	PRSS36	NAAA	FPR3	FABP3	GCH1		HLA-DPA1		RPL34	CD8B	HMMR		IFI30	COL4A2	GZMB	ACSL1	HEXA	GSN	AQP9	C11orf21	RAB42	CTSL	ARL4C	AIM2	TRPM8	PFKFB4	PLAAT3
		DUSP1	DYNLT1	CREG1	CTSH	DST	CSTB	DEFB1	IFI27	LIMS1	RPL3	ICAM3	MBNL1	CTSD	CD9	GSN	CCP110	EMR1	DLC1	MIR3128	LINC01629	LINC01010	SLC22A23	PLAC8	IER3	PLIN2	SP110		SERPING1		CYP1B1	CLEC2D	ANP32B		SLC2A3	MAP1B	RPS18	PHLDA1	MS4A6A	HSPB1	ARHGAP6	C20orf27	RCN3	DAPK1-IT1	ARL8A	AK1	BNC2	AUH	ALG9
		DUSP6	EFHD2	CSF1R	CTSL	DUSP1	CTSB	ATF5	IFI30	LMNA	RPL5	IER2	MERTK	CTSL	CD52	HCAR2	CDC6	F13A1	DSP	AC009093.2	TNFRSF12A	GXYLT1P3	SLC9A9	UNC119	WWP1	MGST3	UBE2L6		ISG15		VMP1	SYNE2	CDC20		DDIT3	CLDN5	JUNB	H3F3B	NPC2	PARK7	ARHGAP17	CA2	RGL1	DCN	ARMC9	AKAP5	MERTK	OCEL1	ITGB8
		EFHD2	EMILIN2	CSTB	CTSS	EEF1A1	CTSC	C15orf48	IFITM1	MACF1	RPL7	IER3	METTL7B	CYB5R4	CD74	HILPDA	CDC20	FARP1	ECSM2	AP003717.1	LAMA3	TNC	AC010201.2	CD48	FCGRT	HEXB	NEXN		SLAMF8		CCNL1	DUSP4	HMGB3		NUDC	C1R	RPS6	IL1A		SRP14	ARHGAP18	CAD	RHOQ	DEF6	ARMCX1	AKR1C3	MET	TBC1D9	LDHB
		EHD1	EMP3	CTSA	CYBA	ELOB	CTSD	FPR1	IFITM3	MARCKS	RPL10	IFITM2	MPEG1	CYBRD1	CD81	HLA-DPA1	CDC25B	FBLIM1	EDG6	AC040169.3	ALOX5	CD1A	ITGA9	MAPKAPK3	PSAP	IGSF6	APOL6		C1QB		GMFG	CD96	SNRNP25		HSPA8	NFIB	CPVL	BIRC3		CTSC	ARHGAP25	CAMKK2	RNF135	DEPTOR	ARRDC3	AKT3	PRR5L	RNF149	ADTRP
		EMILIN2	EPSTI1	CTSB	CYBB	FABP4	CTSL	GBP5	IL4I1	MFSD1	RPL10A	IFITM3	MT-ND1	CYFIP1	CDC42BPB	HLA-DQA1	CDC45	FBLN5	EGLN3	RNF152	FAM124A	FLRT2	HGF	ADA	CTSZ	FPR3	IFIH1		HLA-A		LYST	RAC2	MZT2B		RPL39	CD59	NR4A2	CREM		C1QA	ARHGAP26	CARNMT1	SCARB2	DGUOK	ASIP	ALAS1	KCNH4	CALCOCO1	S100A13
		EMP1	FCER1G	CTSC	DUSP6	FABP5	CTSS	GBP4	IRF1	MGLL	RPL13A	IFNGR2	NEAT1	CYTH4	CDCP1	HLA-DRA	CDCA2	FCGBP	ELOVL7	APBB3	HP	CARMIL3	PCDHGA10	2009-09-01	CD83	FAM20C	DDX60L		CTSB		CDC42EP3	BTG1	ARL6IP1		MARCKSL1	DSTN	EEF1A1	BTG1		PSMB1	ARHGAP27	CASP7	SDC3	DICER1	ASMTL	ALDH1A2	ARL4C	MARVELD1	IRS2
		EMP3	FCGR1A	CTSD	EFHD2	FAM89A	CTSZ	IER2	ISG15	MMP14	RPL15	IRF1	NHP2	DAB2	CEACAM21	HLA-DRB1	CDCA3	FOLR2	ENTHD1	AL022324.2	ST20-AS1	MAP1A	RND3	BID	HLA-DPB1	CD81	IFITM2		APOE		CNPY3	RHOH	TMPO		STXBP2	RARRES2	RPS3A	SLC25A37		ST13	ARHGAP35	CCDC57	SH3GL1	DLGAP1-AS1	ATF4	ALDH2	CEACAM3	USP13	USP30-AS1
		EPSTI1	FCGR2A	CTSL	EMP3	FBP1	CXCL16	CLU	JUN	MMP19	RPL17	IRF2BP2	NME1	DNPH1	CENPV	HPGD	CDCA5	FOSB	ETNK2	DACH1	STXBP5-AS1	AC092353.2	PMP22	SYTL1	SDC3	MMP14	NMI		CD274		VNN2	BATF	LSM4		CD44	PRSS23	HLA-DMA	DUSP2		UFC1	ARHGDIB	CCL22	SLC16A7	DOK1	ATF5	ALDH5A1	EIF3CL	CXCL16	PLIN2
		ETS2	FCGR3A	CTSS	ENO1	FCGRT	CYB5A	CD300E	JUNB	MPP1	RPL21	ITGB2	OLFML2B	DOCK4	CES1	IDS	CDCA7L	FPR1	FA2H	AZIN1-AS1	ISYNA1	CLDN1	DNM3	ABI3	APOC1	TMEM176A	TAP1		GBP2		CD36	PRKCH	DNMT1			SOX4	NPM1	TREM1		ARHGDIB	ARHGEF12	CCN3	SLC45A4	DPYSL2	ATG9B	ALOX5	SEMA3A	PLCD1	CYP27A1
		FCER1G	FCN1	CTSZ	EPSTI1	FDFT1	CYB5R3	IL1R2	KLF6	MS4A4A	RPL23	JUNB	PIM1	DYSF	CFD	IL17RB	CDCA8	FUCA1	FAIM2	LCA5	TNFSF14	TOMM20P2	SETP21	TSC22D3	CTSD	GSN	GBP5		PLEKHO1		LST1	TNFRSF4	RAD51AP1			MDK	HERPUD1	SPP1		VSIG4	ARID4A	CCND1	SLC4A7	EDA	ATOX1	ALPK1	TARP	GBP1	LGALS3BP
		FCN1	FGL2	CYBA	FBP1	FFAR4	CYP27A1	BCL2A1	LAP3	MTRNR2L12	RPL23A	LCP1	PTMA	ECM1	CHCHD10	INHBA	CDK1	GADD45B	FAM124A	CACNA2D3	IRS1	ZBTB7C	MRO	CFD	ADAP2	NR1H3	ATF5		TNFAIP2		RGS2	MALAT1	C1QB			LMNA	RPS11	SAT1		IDH1	ARL6IP1	CCND3	SLC7A8	EEF1A1	ATP6V0D2	ALPL	IL4I1	NR1D1	ALDH2
		FGR	FKBP15	CYBB	FCER1G	FHL1	DAB2	FOS	LILRB4	NME2	RPL26	LILRA1	PTPRE	EDNRB	CHDH	ISCU	CDK2	GAL3ST4	FAM135B	AC006230.1	PPFIA4	TTC39B	JADE3	AIF1	RB1	NPL	TIMP1		HLA-DQB1		YPEL3	TUBA4A	UBE2S			CRABP2	IL1R2	NFKB1		NDUFB2	ARMC9	CCNG1	SLC9A9	EEPD1	ATRNL1	AMER1	HS3ST1	A4GALT	MACC1
		FLOT1	FLOT1	CYFIP1	FCGR1A	FLNA	DEFB1	TYMP	LYN	NPC1	RPL27	LILRA2	RAP2B	EMP1	CHST12	ITM2B	CDK5RAP2	GALNT14	FANCE	SNORA28	MDGA1	DCLK2	MERTK	GPBAR1	CD59	NPC2	TRIM22		LGALS2		SH3BGRL3	LBH	H2AFX			BGN	ARL4C	PTX3		SMS	ARMT1	CCR5AS	SPTLC3	EFHD2	AXIN2	AMIGO1	LGMN	TLR1	GLDN
		FNIP2	FNIP2	DAB2	FCGR2B	FOLR3	EDEM2	CALHM6	MAFB	NPC2	RPL27A	LILRA5	RBM3	ENPP2	CITED2	KMO	CDKN2C	GAMT	FBXL16	CERS4	ENHO	PODXL	PKD1L3	TUBA1A	FGL2	FCGRT	IFI16		CXCL1		FBXL5	TSC22D3	DHFR			AKAP12	RPL30	LITAF		DYNLL1	ARNT	CCRL2	SRSF7	EGF	AZU1	AMOTL1	MYO7A	PPARG	GAPLINC
		FPR3	FPR1	DMXL2	FCGR3A	FTH1	FABP4	SELL	MARCKS	NR1H3	RPL31	LILRB1	RNASE2	EPHB2	CLCN4	LGALS3BP	CDKN2D	GATM	FBXO15	EFCAB12	SMIM2-AS1	DCSTAMP	SPTLC3	CX3CR1	FRMD4B	CTSA	PARP9		HLA-C		PLP2	RPS27	SLC25A5			CRYAB	REL	MMP19		ANXA5	ARRB2	CD1C	STAB1	ENSA	B3GNT7	ANGPT4	MCOLN3	ITGA6	BSG
		FTH1	FYB1	EFHD2	FCN1	FTL	FABP5	KLF6	METTL7B	NRP2	RPL34	LILRB2	RPL8	ETV5	CLDN7	LPL	CDKN3	GFRA2	FBXO2	MYLK	FAM110B	FHL1	CASKIN2	CUX1	NPC2		PLSCR1		CCL4		RHOB	FGFBP2	ANAPC11			ID3	RPS26	SDC2		ENO1	ATG4C	CD1D	TCF12	ESPL1	BATF	ANKRD13B	ANKRD1	CCDC85B	LINC02185
		G0S2	GBP1	EMILIN2	FOS	GCHFR	FAM89A	RNF213	MT-ATP8	OLFML2B	RPL35	LRRK2	RPL9	F13A1	CLDN23	MACC1	CDT1	GHRL	FGD5	MLC1	CUBN	ROR1-AS1	NPL	BIN2	HLA-DQA1		IDO1		PRDX1		SLC2A3	2001-09-01	PTMA			CTTN	RPL31	EMP1		UQCRH	ATG7	CD22	TIFAB	EYA2	BATF2	ANKRD22	ASIP	CDC42EP3	ADGRE1
		GADD45B	GBP4	ENG	FPR1	GLDN	FBP1	TAGAP	MT-ND4L	PLA2G7	RPL36A	LST1	RPL14	FAM20A	COL8A2	MDK	CENPA	GIMAP5	FLT1	C10orf105	ADGRE3	MT1G	SAMD4A	LTA4H	MARCKS		GIMAP4		PSMB9		MEGF9	SH2D2A	GMNN			EMP1	RPL18A	OSM		NDUFA1	ATOX1	CD44	TLR4	FAH	BCL2L2-PABPN1	ANKRD24	SLC40A1	PDLIM7	HPGDS
		GBP1	GBP5	F13A1	FYB1	GLIPR2	FCER1G	PTPRE	MT2A	PLD3	RPL37A	LYZ	RPL23	FAM20C	COLEC12	MLPH	CENPE	GLT25D2	GALNT12	MIR3975	SLC1A2	MYL9	OTOA	RGS19	MERTK		PSMB9		IL32		CDC42	PYHIN1	YWHAH			EGR1	SPINT2	IL23A		CAPZA2	ATP2B1	CD55	TRIB1	FAM25A	BCL3	ANKRD34A	FFAR2	RMND5A	SLC47A1
		GCH1	GCH1	FAM20A	GABARAP	GLRX	FCGR1A	ACTB	MTRNR2L12	PLTP	RPL38	MARCKSL1	RPL27	FAM198B	COMT	MME	CENPF	GLYATL1	GJB2	CCDC136	PDGFRB	AK4	AC089999.2	SIGLEC10	RGL1		PSME2		UBE2L6		PLBD1	CNOT6L	MZT2A			MT1E	RPL19	LIMS1		MGST3	ATP6V0D2	CD58	TTYH3	FAM49A	BIRC7	ANKRD63	CD163L1	LST1	VMO1
		GK	GIMAP4	FCER1G	GLIPR2	GPD1	FCGR3A	SGK1	MX1	PMP22	RPLP2	MCL1	RPL35	FCHO2	CORO2A	MSR1	CENPH	GNG2	GLT8D4	AC037193.1	SERPINA1	GPT	OTOAP1	FAM89B	JUN		PML		PARP14		ITGAM	SH2D1A	LDHB			PPIC	RPS19	TNFAIP8		ECH1	ATP6V1C1	CD72	ULK2	FCGBP	BLNK	ANKS6	SNCA	MT1X	LGALS3
		GPR84	GIMAP7	FCGR2A	GLUL	GPNMB	FCGRT	SRGN	NFKBIA	RALA	RPS2	MNDA	RPL36	FEM1B	CPE	MYL12A	CENPJ	GPR155	GPR124	TBATA	PLEKHN1	PTGDS	WLS	EVL	RGS10		GMPR		MTHFD2		EIF3M	PRDM1	MCM3			TCF4	PAK1	NRG1		GLUL	ATP8A1	CD164	WIPF1	FFAR2	BLVRB	ANO5	FBLIM1	XPC	SLC7A8
		GSTO1	GLUL	FCGR3A	GNG5	GPX4	FN1	ANXA2R	NINJ1	RAP2B	RPS4X	MXD1	RPL38	FMN1	CPM	MYO6	CENPK	GPRC5B	GPR30	TTYH2	CES1	NOTCH3	STARD13-IT1	TPPP3	CREG1		MNDA		CD38		RPL32	XCL1	CARHSP1			TINAGL1	SGK1	DSE		C1QB	ATP8B4	CD300LF	ZC3H12D	FGD4	BMI1	ANXA1	LRRC32	GK	FHL1
		H3F3B	GNG5	FCGRT	GPX4	GRINA	FTH1	SOCS1	NME2	RGS1	RPS5	NAMPT	RPL41	FNIP2	CRIP1	NEIL2	CENPL	GSDM1	HES2	RPS15AP10	ATP1B2	AC022509.1	CRACDL	HCK	NR4A3		BST2		LILRB4		AHNAK	IL2RG	NASP			CCND1	RPL23A	MXD1		RGS10	ATP11A	CDA	ZFP36L1	FGF21	BMP2K	AOC3	RGL1	EVI2B	TBC1D4
		HCK	GRB2	FOLR2	GRB2	GRN	FTL	VAMP5	PHLDA2	RNASE1	RPS6	NCF1	RPLP2	FOLR2	CTSC	NMB	CENPM	HES1	HPGD	IFITM3	TMEM45B	SPSB1	LINC02344	CSK	HLA-DPA1		SERPING1		CTSC		EEF1D	ICOS	CLSPN			LCN2	CD69	FNDC3B		TPI1	ATP13A2	CDV3	ZSWIM6	FHAD1	BNC2	AOX1	CD48	AMT	CD37
		HIF1A	GSTO1	FOS	GRINA	GSN	GAA	CCRL2	PIM1	RNASE6	RPS10	NEAT1	RPS8	FPR3	CXCL16	NUPR1	CENPN	HEY1	HSD11B1	SDS	PLD4	SOBP	AC010627.1	ZNF703	CXCL2		ANKRD22		IL18BP		CEBPD	LAT	CENPE			FILIP1L	MYADM	IL7R		UQCRQ	ATRN	CEBPB		FNDC3B	BNIP3	AP1M2	E2F2	GABARAPL1	KCNAB1
		ICAM1	H1F0	FPR3	GRN	GSTP1	GCHFR	SERPINB1	PPP1R15A	RNF130	RPS11	NFKBIA	RPS26	FRMD4B	CYB5A	OPN3	CENPP	HGF	INHBA	AC013474.1	MAP3K7CL	CALHM1	TMEM106A	MYO1F	ZFP36L1		SPATS2L		DRAM1		QPCT	OCIAD2	C1QC			OCIAD2	RUNX3	SH3BGRL3		COX5B	B3GNT2	CES1		FOS	BRI3	AP4E1	FUCA1	RAB11FIP4	LIMA1
		IER3	H3F3B	FTL	GSTO1	GYPC	GLIPR2	LCP2	PSMB9	SDC2	RPS14	NUMB	RPS28	FYB1	CYB5R3	PARAL1	CENPS	HPSE	KRT6L	MTSS1	AP000695.1	COL8A2	MYO7A	BRI3	CHMP1B		STAT2		CD63		DAZAP2	STK4	CCNA2			A2M	PPP1R14A	TNIP1		NPM1	B3GNT7	CLEC4D		FOXP1	C10orf95	AP4S1	ANKRD29	MITF	CSTA
		IFI6	HAVCR2	FYB1	H2AFJ	H2AFZ	GLRX	LILRB2	RGL1	SDC3	RPS15A	PLAC8	RPS29	FZD2	CYP27A1	PCOLCE2	CENPU	HS3ST1	LAMP3	AC010280.2	GABRR2	SLC27A3	SGPP2	LILRB2	SLC7A8		XRN1		CST7		EFHD2	PCSK7	ALOX5AP			MT1M	AREG	KYNU		PSMA4	BASP1	CLEC4E		FTL	C12orf4	APBB2	BATF	TMEM9	FTH1
		IFI27	HMOX1	GAL3ST4	HCK	HDDC2	GLUL	CD69	RSAD2	SDS	RPS17	PLP2	S100A8	GAL3ST4	DCSTAMP	PDLIM1	CENPW	HS3ST2	MFAP4	AC083973.1	MARCHF3	C7orf57	AL589993.1	GPSM3	HLA-DRB1		PNPT1		NINJ1		TLE4	CCND2	ANLN			PPP1R14A	PHLDA2	ATP2B1		PSME2	BBS5	CLEC5A		GAS6	C12orf76	APCDD1L	GPR35	SSBP3	ATP10A
		IFI30	HRH2	GLMP	HSBP1	HEXB	GM2A	MT2A	S100A10	SDSL	RPS18	POU2F2	S100A12	GALM	DDIAS	PEBP1	CENPX	HTR2B	MMP12	AC080080.1	COBL	ADAMTSL4	ADCY6	HHEX	HSPH1		BAZ1A		C1QA		BST1	PIM2	SNRPD1			HSPB1	CCND2	SLC16A10		POMP	BHLHE41	CLEC12A		GFRA2	C15orf62	APOL3	TNFRSF9	DUSP2	GALNT12
		IFITM1	HS3ST1	GLUL	IFI27	HLA-DMA	GNPTG	HIF1A	SAT1	SEMA4A	RPS19	PRELID1	SAMHD1	GAS6	DHCR24	PHLDA3	CEP44	IER3	MYO15A	SNORA53	BATF3	ALDH1A2	TFAP2C	ACTB	HERPUD1		CHMP5		SNX10		RPL36	PTPN7	RRM1			GPX3	RPL9	PNP		MDH1	BLNK	CLMN		GNLY	C19orf44	AQP2	GRAP	SLC25A29	DNAJC5B
		IFITM3	HSBP1	GNAI2	IFI30	HLA-DPA1	GPCPD1	TIMP1	SERPINH1	SGK1	RPS20	PTPRC	SERBP1	GAS7	DIXDC1	PILRA	CEP55	IGF1	NANOS1	AC073957.3	WHAMMP2	SLC12A8	AL589765.5	SLC25A6	LACC1		SP100		B2M		LCP1	KLRG1	DNAJC9			CYB5A	RPS4X	UPP1		MSR1	BLOC1S2	CLUH		GOLGA5	C1GALT1	AQP3	BCL2L2-PABPN1	C5AR2	PTGER3
		IFNGR2	IFI6	GNS	IFITM2	HLA-DPB1	GPNMB	TNFSF13B	SGK1	SLC16A10	RPS25	PTPRE	SET	GLMP	DLC1	PLA2G16	CEP57	IGFBP4	NDP	AC005391.1	AL451123.1	FANCE	AP1B1	FMNL1	MAFB		NUPR1		ISG20		NDUFB1	AKNA	MCM5			IGFBP6	RPL29	B4GALT1		ARPC1B	BLVRA	CMTM3		GPR137B	C1orf127	AR	RBP1	PLXDC2	C9orf16
		IGSF6	IFI16	GPNMB	IFITM3	HLA-DQA1	GRINA	LMNB1	SLC39A8	SMIM3	RPS27	RIPOR2	SFPQ	GM2A	DNAAF4	PNPLA6	CEP57L1	IL10	NDRG2	INPP4B	PPP2R2B	INHBA	AC008972.2	RASGRP2	AXL		PSMA4		CTSZ		PFDN5	STAT4	HELLS			MGST1	HSPA8	ATP1B3		PPDPF	BLVRB	CMTM6		GPR3	C2	ARAP3	FMN1	SH3PXD2A	RETREG1
		IL1B	IFI27	GRB2	IFNGR2	HLA-DQB1	GRN	ACSL1	SOD2	SMPDL3A	RPS27A	RNASE2	SH3BGRL3	GNB4	DTX4	PPIC	CEP78	IL18BP	NEDD9	GAD1	PHLDA2	RAI14	RN7SL138P	AP2A1	CD74		CCR1		NR1H3		RPL36A	CORO1A	TACC3			VCL	CKS2	PPP1R15A		NPC2	BST2	CNIH3		GPSM3	C20orf194	ARFGEF3	PHGDH	MOB3B	CTSW
		IL1RN	IFI35	GRN	IGSF6	HLA-DRA	GYPC	CCL7	SPP1	SOAT1	RPS29	RPS9	SNRPD1	GNPDA1	ECH1	PROS1	CEP128	INPP4B	NFE2	AL136982.3	NPAS2	TRIM54	HTR7	PPP1CA	CD81		PSMB8		HLA-DRB5		IER2	PIK3IP1	SPP1			PMEPA1	G0S2	PDE4B		LIPA	BTN2A2	COL8A2		H2AFY2	C3AR1	ARHGAP23	RSAD2	MEGF9	MSR1
		IL4I1	IFI44L	H1F0	ITGAM	HLA-DRB1	HERC5	CYP1B1	SQSTM1	SOD2	S100A13	S100A4	SNRPD3	GNPTAB	ECHDC2	PTMS	CEP152	KCNJ5	NPR1	AL035427.2	CCR2	IL1RN	AL133371.2	LYL1	EGR2		PLAC8		LAMP3		EVI2A	CD6	FEN1			IFITM1	RPL22	GLIPR2		PFN1	BTN3A3	COLEC12		H3F3A	C6orf132	ARHGEF10	NTRK3	LRP3	SERPINA1
		IRF7	IFIH1	H2AFJ	ITGB2	HLA-DRB5	HEXB	MXD1	STAT1	SPP1	SCD	S100A8	SNRPE	GNS	ECSCR	RASSF8	CEP295	KCNMB4	OLR1	TMEM119	ARAP3	ITGB3	LTBP2	RHOG	MPEG1		IRF1		MT2A		FLNA	RASGRP1	PPIA			PCOLCE	HSPE1	CDKN1A		SDHB	C1orf21	COPZ1		HCAR3	C6orf48	ARHGEF10L	KITLG	MICAL2	GYPC
		ISG15	IFIT1	H2AFY	JUNB	HNMT	HLA-DMA	LILRB1	TAOK1	STAB1	SNHG25	S100A9	SNRPF	GPNMB	ENPP4	RBP4	CHAF1A	KLF12	OSTbeta	NHEJ1	C1S	DNASE2B	RBP1	S1PR4	SGK1		ZC3HAV1		PSMB8		MYO1F	RPS15A	ANP32E			F2R	RPS14	CEBPB		GABARAP	C1QA	COTL1		HCK	C6orf62	ARHGEF16	PMFBP1	DBP	AC092809.2
		ITGA5	IFIT2	HCST	KCTD12	HP	HLA-DMB	EPSTI1	TAP1	TAOK1	STMN1	S100A12	SPHK1	GPR34	ERP29	REEP5	CHEK1	LGI2	OVOL1	ZNF33B	KRT18	NPR1	FAXDC2	PTGES3	AKR1B1		ADAR				TMEM167A	RARRES3	DDX39A			EPS8	RPL27	ANPEP		RPS5	C1QB	COX10		HECTD2	C9orf85	ARHGEF17	DPP4	SEPTIN3	RBP7
		ITGAX	IFIT3	HEXA	LAIR1	HPGD	HLA-DPA1	BAZ1A	TIMP1	TGFBI	TFRC	SAMSN1	SRSF3	GRAMD4	ESYT1	RHOB	CHTF18	LGMN	PCOLCE2	MT-TS2	AC091492.1	CD1C	DISP1	CCDC12	ABCA1		RBCK1				PRKCB	CYTIP	UBE2T			DSP	PTPRE	ELL2		RPS18	C1QC	CPM		HGF	CA12	ARHGEF28	STON2	BACE1	MGAT3
		JUNB	IFITM1	HEXB	LAP3	HSD17B11	HLA-DPB1	SMCHD1	TNFAIP3	TMEM176A	TMBIM4	SELL	SRSF7	GSDME	ETHE1	RND3	CIP2A	LILRB5	PDGFRB	SEMA6C	ENAH	SPINT1	EBI3	TRAF3IP3	NR4A1		CD69				LRRFIP1	RNF19A	ATAD2			DAAM1	RPS20	LCP2		GPX4	C2	CPPED1		HLA-E	CACNA2D3	ARL4A	GSDMA	CCND3	ACKR3
		KCNN4	IFITM2	HLA-DRB1	LAPTM5	HSPB1	HLA-DQA1	DUSP1	TNFSF13B	TMEM176B	TMSB4X	SERP1	STAB1	H2AFY	EVL	S100A6	CKAP2	LTC4S	PDLIM4	LYPD3	RIPOR2	AL157935.2	AP2A2	EEF2	TNFAIP3		NAPA				NFE2	GPR171	CEP55			LMO7	EEF2	APOBEC3A		GATM	C3AR1	CRABP2		HLX-AS1	CADM1	ARL4D	TMEM37	C16orf54	MCEMP1
		KDM6B	IFITM3	HLA-DRB5	LGALS1	INHBA	HLA-DQB1	ELF1	TXN	TPM4	TOMM7	SERPINB1	TIMP1	HAMP	FABP4	S100A13	CKAP2L	MAFB	PITX1	GNAI1	RHBDL3	ACOT4	NR3C2	IKZF1	HBEGF		PLEK				FPR1	ZAP70	GINS2			AEBP1	PMAIP1	TRAF1		RPS28	C5AR1	CREB5		HMGCR	CALHM6	ARMH1	GPR84	PHLDB1	PILRA
		KLF6	IFNGR2	HMOX1	LILRA2	LAMTOR1	HLA-DRA	JUNB	TYMP	TSPAN4	TSPO	SERPINB9	TLR2	HAVCR2	FAM89A	SCD	CKS1B	MARCKS	PODXL	AL021707.5	SEC14L2	FABP5	ADGRG6	FKBP1A	TCF4		GLUL				CREB5	CD52	MAD2L1			TNFRSF12A	GSN	FOSL2		ARPC5	C5AR2	CS		ICAM2	CALML4	ASB13	PPP1R14C	AK1	CD81
		KYNU	IL1R2	IDH1	LILRB1	LGALS3	HLA-DRB1	RIN2	UBC	TTYH3	UBB	SKIL	TYMP	HELZ	FBP1	SELENOM	CKS2	MERTK	PPP1R13B	AC074032.1	FAT1	PPFIBP1	LINC01374	RABGAP1L	CLTC		LGALS9				KLF2	LAG3	ASPM				DUSP5	F3		RPS2	C6orf62	CSF1		IFIT3	CAMK1G	ASB2	OLFML2B	RAC2	DTX4
		LACTB	IL4I1	IFI27	LILRB2	LGALS3BP	HLA-DRB5	NINJ1	UBE2L6	UGCG	UQCRB	SLC2A3	VCAN	HGF	FFAR4	2011-09-01	CLSPN	MPEG1	PROC	TPST1	ITGA1	DIXDC1	LINC02798	CTSS	PRNP						CD44	SYTL3	PLK1				ARL5B	RNF19B		PCBD1	C12orf76	CSF3R		IFNAR1	CAMLG	ASCL2	ITGBL1	PLEKHG2	HCAR2
		LGALS1	IRF1	IFI27L2	LILRB4	LITAF	HNMT	CD48	VAMP5	ZFP36L1	VMO1	SLC25A37	VMP1	HIF1A	FGD5	SERPING1	COMMD4	MRO	PRRX2	TRIM50	COL15A1	CSF1	SGPL1	SLC11A1	RNASE6						PSTPIP1	ODF2L	CENPN				HLA-DQA2	ICAM1		CD81	CACNA2D3	CTNNB1		IFNGR2	CCDC112	ASIC3	CCL13	INPP5K	PPARG
		LGMN	IRF7	IFITM3	LRRC25	LMNA	IFI6	TPM4	ZFAND2A	ZNF638	VSIG4	SLC38A2	ZEB2	HM13	FHL1	SLC47A1	COQ2	MS4A6A	PRSS21	ADCY10P1	SETBP1	ADAM12	CALML4	CDC42EP3	GPR183						MCL1	SLFN5	ASF1B				RPS21	ZC3H12A		EIF2S2	CADM1	CTPS1		IGF1	CCDC120	ASPHD2	PVALB	MEF2D	CD101
		LHFPL2	ISG15	IGSF6	LST1	LPL	IFI30					SOD2		HMOX1	FIG4	SNX2	CRNDE	MTSS1	PTGDS	AL158824.1	FAM189A2	GPX3	AC080013.2	CEBPB	HLA-DRA						POU2F2	RPS3	SNRPB				RPS27A	PLSCR1		PSMA7	CALHM6	CTSH		IL10	CCDC149	ASTL	P2RY11	PIK3CG	ABHD5
		LILRB1	ISG20	ITGAM	LYZ	LRP1	IFIT1					SP100		HS3ST1	FILIP1L	SPN	CTNNAL1	MYO7A	PTPRF	GRIP1	AC015660.1	TGM2	AC016397.2	PPM1N	HLA-DMA						HSD17B11	ARL4C	CDKN2C				RPS16	KDM6B		UQCR10	CALM3	CTTNBP2		IL10RA	CCDC32	ATF3	AHRR	SLC24A4	SPARC
		LILRB2	KCTD12	ITGB2	MAFB	LRPAP1	IFIT2					SRGN		IDH1	FN1	TBC1D4	DBF4	NISCH	QPCT	AC009951.6	TTC25	CCL18	NBL1	RRAS	C2						VAMP2	KLRF1	SKA2				RPL37A	MCL1		ADI1	CALR	CXXC5		IRF8	CCDC80	ATG13	GCNT4	COQ8A	ITSN1
		LILRB4	KLF6	ITM2B	MCEMP1	LST1	IFIT3					STK17B		IGFBP4	FTH1	TCEA3	DCK	NR1D1	RAB11FIP4	AC009961.3	PTPRH	ALDH18A1	IGHEP2	PTPRC	ANKH						MDM4	CLIC3	CENPK				RPL18	RNF144B		HINT1	CAPN1	CYC1		IRX6	CCL13	ATG2A	NEURL3	CLEC4E	CDC42EP3
		LIMS1	LAIR1	ITPR2	MNDA	LTA4H	IGSF6					STXBP2		IL4I1	GABARAPL1	TFRC	DCTN3	NR4A1	RAP1GAP	SNX29P2	AL121985.1	ENTHD1	TBC1D14	CDC42	TMEM176B						RGS18	PNISR	CKAP2				RPL8	ADM		PTMS	CAPZA2	CYCS		ITGB5	CCL18	ATL1	VEGFA	PTK2	TCEA3
		LITAF	LAP3	KCNMA1	MRC1	LYZ	INHBA					SUB1		IL6R	GALNT12	TLCD2	DDB2	NR4A2	RASL10A	CFAP20DC	VWCE	TMEM45B	GIMAP1	CDKN2D	UBB						EMP3	GIMAP7	USP1				HSP90AA1	SPHK1		NCF4	CAPZB	CYP27A1		ITPR2	CCL2	ATP10A	HS3ST2	GLIPR2	PDLIM1
		LMNA	LAPTM5	KCTD12	MS4A6A	MARCO	ITM2B					TIMP1		IL10	GAPLINC	TMSB4X	DDX39A	OAF	RGNEF	MROCKI	AC010198.2	CLEC6A	NAIP	GDI2	TTYH3						FXYD5	RNF125	MCM4				RPL24	CTNNB1		TCEAL8	CARD6	DCSTAMP		KCNJ2	CCL23	ATP2B3	GSDME	RAPGEFL1	TMEM91
		LYN	LGALS1	KLF6	MYL6	MCEMP1	LAMP1					TLR2		IQGAP2	GATA3	TREM1	DEK	OLFML2B	SARDH	SNORD12C	FAM135B	AL049836.1	CD320	PRKCB	LPAR6						UQCRB	CHST12	DNASE1L3				RPL27A	CFLAR		IDH2	CAVIN1	DDX21		KCNMA1	CCL3	ATP2B4	KLHL41	IFITM2	MGST3
		MAFB	LGALS9	LAIR1	NAIP	MGST3	LAMP2					TMEM167A		ITGA9	GCHFR	TSPAN3	DEPDC1	OLFML3	SERPINE1	FAM174B	CHRD	TREML1	ADI1	RPS29	DNAJA4						HCST	DUSP2	LMNB1				RPL13A	SLC7A5		RPL36AL	CBLB	DENND3		KDM7A-DT	CCL7	ATP8B1	PALS1	KCNQ1	AC004889.1
		MARCKS	LGMN	LAPTM5	NCF2	MLPH	LGALS3					TNFSF10		ITGB2	GLDN	TXNIP	DEPDC1B	P2RY6	SERPINI1	AL161935.1	ITGB4	AL159166.1	HRH1	PTP4A3	LAMP1						H3F3B	PDCD4	RAD21				CREM	MAP2K3		SKP1	CBX1	DIAPH1		LAIR1	CCL8	ATP8B2	RASSF2	ATL1	HOXB6
		METRNL	LHFPL2	LGALS1	NEAT1	MME	LGALS3BP					TNFSF13B		ITSN1	GLRX	UNC5B	DHFR	P2RY8	SETBP1	AC136475.1	KLHDC7B	CXCR2	GFRA2	ITGAL	TIPARP						CD55	MIAT	C1QA				RPL11	TNF			CCDC152	DKC1		LAT2	CCNG1	ATP8B3	ADARB1	DOCK3	TXNIP
		MIR3945HG	LILRA5	LGMN	NOP10	MS4A7	LIPA					TPT1		KCTD7	GPATCH11	VMO1	DIAPH3	PGA5	SLC1A2	MYLK3	DNAH3	ATP2B2	ENTR1	KLF3	SASH1						ZFP36L2	GNG2	UBB				BASP1				CCDC170	DNAJC5B		LAYN	CCNI	ATXN3	TUBA1C	CCL24	ITM2B
		MMP19	LILRB1	LHFPL2	NPC2	MSR1	LPL					TYMP		KCTD12	GPRIN3	WWTR1	DLGAP5	PID1	SLC1A7	AC015909.5	OSBP2	AC015911.3	AC010615.1	ATG3	CITED2						CKAP4	FKBP11	RNASEH2A				NAP1L1				CCDC200	DOK3		LBR	CCS	AVPI1	GRIN3A	BHLHE41	UBASH3B
		MPP1	LILRB2	LILRB2	OAZ1	MT-CO1	LRPAP1					USP15		KIAA0930	GPX3		DNA2	PTGIR	SLC20A1	AF274858.1	KCNK5	NCS1	FARP1	PRAM1	MFSD1						RPL21	BIRC3	RACGAP1				PPP1R15A				CCL2	DRAM1		LGMN	CD163	AXL	PTPN21	LRCH1	HCST
		MT2A	LILRB3	LILRB4	PDXK	MT-CO2	LTA4H					VAMP5		KITLG	GSN		DNAJC1	PTGS2	SLC24A3	BX322234.1	KCNA2	COL6A2	CHIC1	SLC44A2	CD4						HEBP2	SIT1	HLA-DRB5				RPS15A				CCL4	DTL		LILRA6	CD163L1	B3GALT6	KALRN	ST6GAL1	ACOT4
		MX1	LILRB4	LIPA	PFN1	MT-CO3	LY6E					VCAN		L3MBTL4-AS1	GSTP1		DNAJC9	PTPRN2	SLC28A3	CTD-2201I18.1	TSPAN2	CXCL5	SASH1	MS4A7	CD14						CD300E		PHF19				RPS13				CCL5	EARS2		LILRB4	CD180	B4GALT6	IGSF22	TMEM91	AKAP5
		MXD1	LY6E	LRP1	PLA2G7	MT-CYB	LY86					VSIR		LACC1	GYPC		DNMT1	RAB3IL1	SLC30A3	GALNT14	TCF7L2	LINC02154	DDR1	ICAM2	TMEM176A						RPL7		NUDT1				RPL32				CCL7	EGR2		LIMS1	CD200R1	BACE1	MMP1	UNC5B	TEX14
		MYO1G	LYN	LY96	PLAUR	MT-ND1	LYZ					ZFP36		LAMP1	H2AFZ		DONSON	RGL1	SLC38A1	HERC3	ATP2A3	KCNJ1	AC048382.6	CDH23	ENPP2						TSC22D3		MRPL51								CCL8	ENO1		LINC00243	CD22	BAHCC1	SLC7A8	FBXL20	SVIL
		NAMPT	MAFB	MAF	PLEK	MT-ND2	MARCO							LAPTM5	HADH		DSCC1	RNASE1	SOBP	LINC02397	TPD52	MARCO	AC060766.5	LILRA2	TMEM37						TRMT1		FAM111A								CCL13	ERGIC1		LINC00309	CD274	BBC3	CCL3	NIBAN2	CYSLTR1
		NBN	MARCKS	MAFB	PLXDC2	MT-ND3	MCEMP1							LGMN	HCAR2		DSN1	RNASE2	SORBS1	TNNC2	CDKN2A	AL138899.1	MS4A6A	CYTH4	PMP22						OSCAR		CACYBP								CCL18	ERLIN1		LINC00346	CD28	BBS10	LAMA1	ITGAX	GLRX
		NEAT1	MNDA	MARCKS	POMP	MT-ND4	MCOLN1							LHFPL2	HCAR3		DTYMK	RND3	SPN	FAAH	SLC25A29	EGLN3	TPCN1	PGLS	NENF						IQGAP1		MYBL2								CCP110	ETF1		LINC00501	CD2AP	BCAM	PLXNC1	CDKN2B	ECSCR
		NECTIN2	MPP1	MERTK	PSAP	MT-ND4L	MDK							LILRB2	HDDC2		DUT	SCAMP5	STAC	TNFRSF8	COL5A3	SEL1L3	HEXD-IT1	APOBEC3A	ICAM1						NRG1		CKLF								CD28	F3		LINC00563	CD300A	BCAR3	ST18	BCL2L11	GNG12
		NFE2L2	MS4A4A	MFSD1	PSMB3	MT-ND5	MGST3							LILRB4	HILPDA		E2F1	SDS	SYNJ2	KCNH4	C1RL	CSRP2	CRYBB1	CHMP4B	IDH1						SULT1A1		MCM6								CD36	F11R		LINC00597	CD36	BCAS3	ADCY1	TRIM22	JPT1
		NFKB1	MS4A6A	MGAT1	PSMB9	MTPN	MIR3945HG							LILRB5	HLA-B		E2F8	SECTM1	SYTL1	AC092803.3	NRIP3	CECR2	ABLIM3	SP110	AP1B1						GLIPR2		RPL39L								CD38	FAM117B		LINC00607	CD48	BCDIN3D	G0S2	NFIX	IL1B
		NFKB2	MT2A	MGLL	PSME2	NCF2	MLPH							LIMS1	HLA-C		ECT2	SELENBP1	TACSTD2	AC068898.2	AC009974.1	PCARE	AC009159.3	PKN1	AHR						CD302		CCDC34								CD47	FAR2		LINC00838	CD59	BCL11A	PLAU	RNF125	TSPAN3
		NFKBIA	MX1	MPP1	PTAFR	NQO2	MNDA							LIPA	HLA-DMA		EFCAB11	SEPP1	TCF7L2	AC104794.3	LINC00937	SEMA3C	ULK3	TBC1D10C	STMN1						CORO1A		LSM5								CD59	FARSB		LINC01063	CD7	BCL2L11	KCP	ULK1	PRSS21
		NFKBIZ	MX2	MRC1	PTTG1IP	NUPR1	MRC1							LRRC25	HLA-DPA1		EMC9	SERPINB2	TDRD9	AC010359.3	GRHL1	BEND3P2	TNFSF18	LILRB1	TIMP2						PGD		KIF22								CD84	FBP1		LINC01085	CD80	BCL6	LDLR	LILRB1	BCL2A1
		NINJ1	NAGK	MS4A4A	PYCARD	OLR1	MS4A4A							MACF1	HLA-DPB1		ENY2	SGPP2	TEAD3	AL157756.1	HILPDA	CHDH	NCF4	BATF3	HSPB1						RPL38		HINT1								CD163	FCGBP		LINC01093	CD93	BCR	IL1A	PRKAR2B	TLCD2
		NPC2	NAIP	MS4A6A	RAB31	PCOLCE2	MS4A7							MAF	HLA-DQA1		ERH	SLC9A9	TIE1	BNC2	PTGES3P1	PARM1	CRHBP	NFKBIZ	AP2A2						RPL37		CHCHD2								CD163L1	FCGR2B		LINC01147	CDC14B	BEAN1	ZNF703	SEMA7A	LY86
		P2RX4	NAPA	NAGK	RAC1	PDLIM1	MSR1							MAFB	HLA-DQB1		ERI2	SLC40A1	TM4SF1	SRP54-AS1	AKAP12	GCHFR	TMED2-DT	GNB2	VOPP1						RPL26		CTSD								CD200R1	FCGR2C		LINC01151	CDK6	BEGAIN	KCTD7	ARHGAP6	ALAS1
		P2RX7	NCF1	NAIP	RNASE1	PEBP1	NENF							MARCKS	HLA-DRA		ESCO2	SLC46A1	TM7SF4	CLEC4G	RAB15	TIE1	CXCL12	TNFRSF1B	GLUL						MSN		TROAP								CD209	FCN1		LINC01370	CDT1	BHLHE41	FAH	TXNIP	OASL
		PDXK	NEAT1	NDUFB2	RNASE2	PECAM1	NEXN							ME2	HLA-DRB1		ESPL1	STAB1	TMEM130	TNFAIP2	LINC01484	S100A16	ADAP2	UQCRB	ITGB5						EIF3E		GGCT								CD300A	FDX1		LINC01504	CDV3	BICD1	BBS5	LRRC20	PLBD1
		PHLDA2	NINJ1	NEAT1	S100A4	PFDN5	NUCB1							MEF2C	HLA-DRB5		EXO1	STARD13	TMEM45B	LINC00954	GIPR	ANGPT4	TCF4	GMFG	CREM						IL17RA		COMMD4								CDKN1B	FGL2		LINC01526	CEACAM3	BICDL1	TMEM163	FHL3	CAMP
		PIM3	NMI	NINJ1	S100A6	PGD	NUPR1							MERTK	HLA-F		EXOSC8	THBD	TMTC1	ETV1	MCF2L	PITX1	SPATA7	PSMB9	VMO1						CCDC69		HNRNPAB								CDKN1C	FGR		LINC01608	CEBPE	BMP1	IER3	NOD2	TFRC
		PKM	OAS1	NPC2	S100A8	PHLDA3	OASL							METRNL	HMOX2		EXOSC9	TLR7	TRIM54	AC131391.1	ID2	MT1E	LINC00671	AP1S2	PTMS						IRAK3		CDT1								CEBPD	FKBP1A		LINC01814	CELSR1	BMP8B	PHKA1	BMF	AKR1B1
		PLA2G7	OAS2	NPL	S100A9	PILRA	OLR1							METTL7A	HPGD		EZH2	TMEM37	TSKU	ICOSLG	ANK1	STEAP4	ITPR2	IER5	TSPAN4						RPLP1		SHCBP1								CELSR1	FLNA		LINC01907	CEP72	BOK	STAG3	ACOX1	DEFB1
		PLAUR	OAS3	NRP2	S100A10	PLA2G16	OSBPL1A							MFSD1	HSPB1		FADS1	TMEM86A	TSPAN2	ARHGAP31-AS1	FZD4	DCDC2	ITGAV	ALDOA	HLA-DMB						SLC11A1		CBX5								CEMIP2	FLRT2		LINC01960	CERK	BPI	IL18BP	AMIGO2	ABCG1
		PLEK	PARP14	OLFML2B	S100A11	PLBD1	OSCAR							MGLL	ICAM2		FAM83D	TMEM119	VASN	AC009093.10	IL18R1	ZBTB8A	TSPAN4	PRELID1	HSP90AB1						RPL35A		HSP90AA1								CHST13	FLVCR2		LINC01963	CFAP61	BRD3	LACC1	CCNG2	AKR1C3
		PLK3	PLAC8	PDK4	S100A12	PLIN2	PCOLCE2							MPEG1	ID3		FAM111A	TSPAN4	VIT	PLCD4	DPYSL4	CLEC1A	WDR81	ACAA1	CXCL3						CYBB		SPC25								CIITA	FMNL1		LINC02085	CFL2	BRICD5	HSF4	NEO1	CSF1
		PLSCR1	PLEK	PLA2G7	SAMHD1	PNPLA2	PDE4DIP							MPP1	IDH1		FAM111B	ZC3H12D	VSX1	AL133351.4	CXCR1	SHROOM4	DLL1	HLA-C	ARL6IP1						AGTPBP1		CDK4								CLEC10A	FOLR2		LINC02205	CHAC1	BTD	LOC107987433	DNAJB5	MT2A
		PNRC1	PLEKHO1	PLD3	SAT1	PNPLA6	PDLIM1							MS4A4A	IL7R		FAM129A	ZFP36	WNT11	PRDM1	AC110769.3	LINC01827	ZNF433	ARHGDIB	FCGR2A						ARHGEF40		PTMS								CLIC2	FOSL2		LINC02458	CHIC1	BTG1	PLAAT1	SLC8A1	IGFBP2
		PPP1R15A	PLSCR1	PLEC	SERF2	POR	PHLDA3							MS4A6A	IL17RB		FANCD2	ZNF503	ZBTB8	TNIP3	AC004381.3	ASAP2	RAB39A	WAS	FTL						CCNY		VDAC3								CLTA	FPR1		LINC02541	CHRFAM7A	BTG2	SRPX	ATXN3	NMB
		PSAP	POMP	PLEK	SERPINA1	PPARG	PILRA							MTSS1	INHBA		FANCG		ZNF366	AC022973.1	TNNT1	GIPC3	ACTRT3	GCH1	TGFBI						ADD3		RHEB								CLTC	FTSJ1		LINC02615	CHST13	BTN3A1	GOLGA8Q	FNDC5	AC020656.1
		PSTPIP2	PRDX1	PLTP	SGK1	PTMS	PLA2G16							MYO5A	ITGB8		FANCI			CTTNBP2	NOS3	CXADR	EMBP1	CYTIP	QKI						RPL28		NME4								CMKLR1	FYCO1		LOC100130298	CLDN1	BTN3A2	NSMF	MXD4	IFI27
		PTAFR	PSMB3	PLXDC2	SH3BGRL3	PYCARD	PLAUR							MYO7A	KAT8		FANCL			PDE7B	RHOF	ADRA2B	TGFBI	PABPC1	CYFIP1						FMNL1		SMC1A								CNDP2	G6PC3		LOC100289473	CLIC2	C11orf21	CMKLR1	DPYSL2	STXBP2
		PTPRE	PSMB9	PLXND1	SLC11A1	RBP4	PLBD1							NABP1	KAZN		FBXO5			AUTS2	HIF1A-AS3	IFNLR1	INPP4B	ARPC1B	TNFRSF21						PTPRC		KIF20B								CNOT1	G6PD		LOC100506098	CLTA	C11orf80	CD274	LRRCC1	APOC2
		RAB20	PSMB10	PMP22	SMCO4	RETN	PLD3							NAGK	LDHB		FDPS			AC009032.1	TRIB2	CCNA1	GVINP1	RPL21	BAIAP2						ERICH1		LSM2								CNP	GAS6-AS1		LOC100507006	CMBL	C16orf45	LAMB3	FZD7
		RALA	PSME2	PRDX1	SMIM25	RGCC	PLIN2							NAIP	LGALS3BP		FEN1			FBLIM1	TMTC1	AL844908.1	NFIA	RHOB	ARHGAP18						TLR2		ENO1								CNRIP1	GCLC		LOC100996664	CMKLR1	C16orf54	ID3	MAP1LC3A
		RASGEF1B	PSTPIP2	PSAP	SPI1	RHBDD2	PPARG							NEAT1	LIMA1		FFAR4			IQCD	CREB5	ALOX5AP	DAPK1-IT1	DEDD2	TFRC						TUBA1A		RGS1								COBLL1	GEMIN4		LOC101927237	CMTM8	C17orf100	PITHD1	MAP3K5
		REL	RARRES3	PTAFR	SRGN	RHOB	PPDPF							NINJ1	LINC02345		FHL1			AC108519.1	ZBED6CL	AL590666.2	TMEM119	NKTR	IL2RA						RASSF2		FAM111B								CORO1B	GEMIN5		LOC101927516	CNDP2	C17orf75	STRIP2	CMBL
		RELB	RGL1	RAB31	ST14	RMDN3	PPIC							NORAD	LIPA		FIGNL1			LINC02363	ARFGEF3	OLFM2	AP001636.1	RPS27	HSP90B1						CLEC4A		MGST3								CREBL2	GFM1		LOC101927596	CNRIP1	C18orf54	HIF1A	HDAC7
		RIPK2	RHOG	RAP2B	TGFBI	RNF149	PRDX1							NPC1	LPL		FN3KRP			ADA	TMEM217	SARDH	SRPX	NEAT1	ATP1B1						DPYD		UQCRQ								CREBRF	GFOD1		LOC101927630	COBLL1	C1orf115	CCL4	EXOSC5
		RNF19B	RNASE1	RASSF4	TIMP1	RTN3	PSAP							NPC2	LRPAP1		FOXM1			AL589644.1	AIM2	FA2H	GPR155	SELPLG	FAM213A						USP3		SVIP								CREG1	GK		LOC101927822	COL24A1	C1orf226	C3AR1	CD300E
		RNF144B	RNASE2	RBM47	TMEM167A	RTN4	PTMS							NPL	LY6E		GALNT12			CAMTA1-DT	DPYSL3	HOMER1	AL078621.1	GNG2	ME1						CRISPLD2		RBBP7								CREM	GLIPR1		LOC101927851	COL27A1	C1QA	AP1S2	BCAS3
		RSAD2	RNF213	RBPJ	TMSB10	S100A4	PTPMT1							NR1H3	MACC1		GEN1			AC069368.2	CLEC6A	TUBB4A	METTL27	WARS	GNPDA1						RTN3		PA2G4								CRHBP	GLIPR2		LOC101927964	COL4A2	C1R	SLIT3	PDGFB
		S100A8	RSAD2	RENBP	TPM3	S100A6	RAB13							NRP2	MARCO		GGH			FBN2	DSP	CD101	AL050338.2	ARHGAP30	NCF4						TMEM107		KIF11								CRIM1	GLRX		LOC105372672	COL6A3	C21orf91	RAD51AP1	FAM214A
		S100A9	S100A8	RGL1	TSPO	S100A11	RBP4							OLFML2B	MDH1		GINS1			STARD10	BEAN1	SPTBN2	RPL7AP64	TNFSF10	LY96						TNFSF13B		TMEM109								CRLF3	GLRX5		LOC153684	COLEC12	C2orf81	ATP8B4	SIK1B
		S100A10	S100A9	RNASE1	TXNDC17	S100A13	RMDN3							OTOA	MGST1		GINS2			PLEKHG6	CARMIL1	FABP5P7	NBEA	FXYD5	DAPK1						RPS15		ZDHHC12								CRYBB1	GLT1D1		LOC285626	COQ10A	C2orf92	DDIT4	SIGLEC5
		S100A11	S100A10	RNASE6	TYMP	SCD	S100A11							PABPC4	MGST3		GLO1			DICER1-AS1	TMEM132A	MAP4K3-DT	TLR5	SH3BGRL	SPRED1						EIF4E3		NENF								CSF1R	GLTP		LPP-AS1	CORO7-PAM16	C3	ADAM8	FOXO4
		SAT1	S100A11	RNF130	TYROBP	SCP2	S100A13							PITHD1	MINK1		GLRX5			PLXDC1	CLEC12B	FAM124A	TBX1	PAG1	ZFHX3						EMB		CDCA8								CT75	GPAT3		LTBP2	CP	C3orf18	LIPN	EVL
		SDCBP	SAMD9L	RNF181	UBE2D1	SCPEP1	SCARB2							PLA2G7	MIR3945HG		GMNN			EYA2	CAPN11	HSPB7	AL512506.3	SECTM1	MSR1						SLC25A37		NCAPH								CTNNA1	GPX3		LUCAT1	CPEB2	C5	THBD	CARD16
		SDS	SAT1	RPS27L	UCP2	SDCBP	SCCPDH							PLBD2	MLPH		GMPS			RBM44	RAP1GAP	ACTA2	CCL4	EMP3	SERPINF1						MTMR11		SNRPF								CTSC	GRINA		LY86	CPNE9	C7orf57	SLC38A7	TSC22D1
		SERF2	SCARB2	SAMHD1	UPP1	SEC11A	SCD							PLD3	MOB3B		GPSM2			GCAT	GPA33	AC105118.1	HTRA1	FCER1G	SPATS2L						ZEB2		ORC6								CTSL	GSAP		MAEA	CREB5	C9orf139	ARHGEF40	NDRG1
		SERPINA1	SECTM1	SAT1	VAMP5	2011-09-01	SCIMP							PLEKHA2	MPC1		GSTP1			AC024568.1	TRIM7	SGMS2	MCC	TGFB1	CKS2						SERPINB1		DLGAP5								CTSZ	GSN		MAF	CREG1	CA11	TMEM266	SPRY2
		SGK1	SERF2	SCARB2	VCAN	SERPINA1	SCPEP1							PLTP	MPC2		GTSE1			AC009093.7	LYPD5	LGALSL	MMD	ERICH1	HMOX1						CDKN2D		BUB3								CXCL1	GTF3A		MANBA	CREM	CACNA1A	HOMER3	FFAR4
		SLAMF7	SERPINA1	SDC3	YBX1	SH3BGRL	SDCBP							PLXNC1	MPZL2		H2AFV			EMC1-AS1	POMC	BCAR1	HMGB1P41	CASP1	KCNMA1						FAM200B		GALM								CXCL2	H2AFY2		MARCKS	CRHBP	CACNA1F	IFI44L	ATG16L2
		SLC2A3	SERPING1	SDSL	ZEB2	SLC7A7	SECTM1							PLXND1	MRC1		H2AFX			AC092384.3	CAMK2B	CENPW	CLIC2	CD300A	ETV5						LENG8		NUF2								CXCL3	HACD4		MARK2	CRYBB1	CACNA1G	GASK1B	CTSF
		SLC25A37	SIGLEC1	SERF2		SLC11A1	2004-09-01							PMP22	MS4A7		H2AFZ			MEST	AC008750.1	SORT1	DUSP27	TXNIP	CCND1						CD93		LIG1								CXCL8	HAGHL		MBP	CSKMT	CACNB3	SPTBN4	ITGAL
		SLC39A8	SIGLEC10	SGK1		SMIM25	SERPINA1							PRCP	MYB		HACD3			RNF150	MSC	IL21R	AL589863.1	OAS1							S100A10		CDCA3								CXCL9	HDAC9		MEF2A	CST7	CALCOCO1	KEL	OPRL1
		SLC43A2	SLC39A8	SH3BGRL3		SNX10	SERPING1							PSAP	MYDGF		HADH			CCDC26	AP003469.2	PSAT1	AC002059.1	CSF1R							COMMD6		NCAPG								CXCL10	HDHD5		METTL7A	CTSA	CALHM1	SIGLEC1	CROCC
		SLC43A3	SNX6	SIGLEC1		SORT1	SIDT2							PXN	MYO6		HAT1			IL12RB1	WARS1	TCEA3	GAMT	TBCB							ACAP2		NOP56								CXCL11	HIPK2		MFSD2A	CTSB	CAMK2B	SGTB	CPED1
		SOCS3	SNX10	SLCO2B1		SPARC	SIGLEC1							RAB3IL1	NCF2		HAUS8			ADAT3	GAREM2	SDC2	TXK	TCIRG1							POLE4		FOXM1								CXCL12	HK2		MGAT5	CTSD	CAMP	KLHDC8B	ALCAM
		SOD2	SOCS1	SMIM4		SPI1	SLC11A1							RAB5C	NMB		HELLS			TMEM220	APOL4	ITPRIPL1	LPAR6	ARHGEF1							TRAF3IP3		SNRPG								CXCR2P1	HLA-DMB		MIR1208	CTSL	CAMSAP3	ATF5	TMEM229B
		SPAG9	SP110	SPRED1		SPN	SLC31A1							RAB42	NNMT		HERC5			PMEL	ITGA5	RHBDF1	SLC38A7	RPSA							EIF2S3		MELK								CYB5B	HMBS		MIR21	CUEDC1	CAPN11	OSM	JMY
		SPHK1	SRGN	ST14		STAC	SMIM25							RALA	NOP10		HINT1			SRP14P3	GGT5	EPS8L2	SH3RF1	RHOF							UBA52		NPM1								CYB561	HPSE		MIR4253	CXCL1	CAPN5	CD22	NBR1
		SPI1	SSB	STAB1		STMN1	SNX10							RAP2B	NT5C3B		HIRIP3			CEBPE	SLAMF1	UNC5B	FZD2	RPL36A							RPL18A		SSRP1								CYBB	HSPA7		MIR4280	CXCL10	CAPS	RAB3IL1	TRPC6
		SPP1	STAB1	TCN2		STXBP2	STX11							RARRES1	NUPR1		HIST1H1B			TMEM30A-DT	MACC1	SCG5	PGBD1	VAMP2							SORL1		AURKA								CYFIP1	HSPA8		MIR4468	CXCL2	CARD16	ZNF496	FADS3
		SQSTM1	STAT1	TGFBI		SVIL	TENT5A							RASGRP3	OPN3		HIST1H1D			CYP2U1	RAB17	SUSD3	MEF2C	MYD88							PLAC8		COX8A								CYP1B1	HSPD1		MIR4708	CXCL3	CARMIL3	APPL2	CAVIN1
		SRGN	TAP1	TIMP1		TCF7L2	TFRC							RGL1	PARAL1		HIST1H2AG			IL7	COL22A1	SPON2	PLXDC1	UTRN							NUMB		WDR34								CYTH2	HSPG2		MIR544B	CXCL6	CARNS1	RNASE1	ASPHD1
		TCIRG1	TCN2	TIMP2		TFRC	TGM2							RNASE1	PCOLCE2		HIST1H2AH			AL031963.3	ANKRD55	COL22A1	PCSK4	CCND3							TMEM91		EZH2								CYTH4	HSPH1		MIR623	CXCL8	CASTOR3	TRIM47	ANKRD44
		TIMP1	TIMP1	TLN1		TGOLN2	TIMP2							RNF130	PDCL		HIST1H2AL			SLC22A18AS	ALPK3	DENND2B	LINC01150	STX10							RPL29		TPRKB								DAB2	HTRA4		MIR6760	CXCR1	CATSPER1	MEP1A	WDR48
		TLR2	TLR2	TLR4		TKT	TMSB4X							RPN1	PDLIM1		HIST1H3G			AC012306.3	ADORA1	PAPLN	AL096701.4	RPL8							CCR2		HSPE1								DAPK1	HVCN1		MIR6874	CYFIP1	CAVIN1	SLC11A2	FCN1
		TNF	TMEM176B	TMEM176A		TMEM14C	TMSB10							SAT1	PEBP1		HIST1H4C			MAP3K9	ANKRD20A4P	AR	MAPK12	PPDPF							ZNF467		GAPDH								DCAF7	IARS2		MMD	CYP4F12	CBFA2T3	SH3D21	CLEC5A
		TNFAIP2	TMSB10	TMEM176B		TMSB4X	TNFSF13							SCARB1	PEX14		HJURP			RPGRIP1	ANKRD20A1	HSD3BP5	KANK2	UBE2J1							RPLP2		BRCA2								DDAH2	ID3		MS4A6A	DAB2	CBR3	FKBP14	KLHL24
		TNFAIP3	TNFSF10	TMSB10		TNFSF13	TNFSF13B							SCARB2	PGM1		HLTF			AC023483.1	SULF2	ZMIZ1-AS1	ZC3H12D	MARCKSL1							TMEM71		TCF19								DEF6	IGSF6		N4BP1	DAB2IP	CBR4	SPRING1	ITIH4
		TNFAIP6	TNFSF13B	TNS3		TPT1	TREM1							SDC3	PHLDA3		HMGB1			MIAT	AC005280.1	AC011899.2	GASK1B	ARPC3							CARS2		SLBP								DENND11	IGSF8		NAA20	DAO	CBWD3	SLC2A8	FANCA
		TNFRSF1B	TPM3	TPM3		TREM1	TREM2							SDS	PHYH		HMGB2			UBE2V1P1	ABCB1	PCBP4	KCNMB4	SYF2							LTB4R		PSME2								DEPTOR	IL1R1		NABP1	DBNDD2	CBWD5	PPM1L	SMIM14
		TNIP1	TPM4	TPP1		TRPV2	TSPAN3							SEC61A1	PKIA		HMGB3			AF111167.2	RNVU1-31	TMEM266	APPL2	RPL4							SSH2		CTSB								DGKA	IL17RA		NARS2	DDAH2	CBX2	COLEC12	BRD3
		TNIP3	TYMP	TREM2		TSPAN3	TSPAN4							SELENOP	PLA2G16		HMGN1			L1CAM	CEP70	ENO2	AC073896.2	RXRA							CAPN2		BRCA1								DHCR7	IL27RA		NCAPH	DDIT3	CBX7	ENTHD1	MGAT3
		TPM4	TYROBP	TSPAN4		TSPO	TSPO							SGK1	PLIN2		HMGN2			HMGA2-AS1	NRGN	NEDD8	FZD1	EEF1A1							CRTAP		SAE1								DHRS3	IMPA2		NDUFV2	DDIT4	CBX8	IGF2BP3	GSN
		TRAF1	UBC	TTYH3		TUBA1B	TXN							SLAMF8	PNPLA3		HMMR			RHPN2	SLC24A3	LINC01283	SLFN12	CHST2							MYH9		MCM2								DHRS9	INAFM2		NEAT1	DDX43	CC2D2A	TMEM106A	EFNB1
		TYMP	UBE2L6	TYMP		TXNIP	TXNIP							SLC1A3	POR		HNRNPA1			LINC00926	RGCC	AC025048.4	CD14	BTK							TREM1		KPNB1								DHRSX	IPO5		NECTIN1	DEF6	CC2D2B	TMEM144	IQGAP3
		TYROBP	UCP2	UBC		TYROBP	TYROBP							SLC18B1	PPARG		HNRNPA2B1			AL391840.3	AC069360.1	CYP4F25P	TLR3	SLC7A7							VIM		TMEM14C								DHX58	IPO7		NLN	DELE1	CCDC151	COL4A2	SIGIRR
		UPP1	VAMP5	UCP2		UBB	UBB							SLC23A2	PPIC		HNRNPAB			AC011676.1	EPB41L4A	SLAMF9	SPICE1	RSL24D1							SCAND1		NDC80								DIP2A	IQSEC1		NLRP1	DENND2A	CCDC154	TMEM268	KIZ
		VAMP5	VMP1	UQCR10		VASP	USP30-AS1							SLC26A11	PPP2R3A		HNRNPR			PTPN14	RNU6-5P	CAMP	LYVE1	CAPZA1							LSM6		MRPL17								DISP1	IRAK3		NPAS1	DEXI	CCDC24	PDCD1LG2	SLC9A3R2
		VMP1	WARS	VMP1		VAT1	VAT1							SLC30A1	PRCP		HP1BP3			AC106865.2	CCND2-AS1	CD2BP2-DT	BLVRB	EIF3E							RPL13		CKAP5								DMD	ITGA3		NPL	DHDDS	CCDC28A	NT5DC2	HSD17B8
		WARS	WSB1	VSIG4		VIM	VMO1							SLC36A1	PRDX1		HSPB11			CARMIL2	CA12	H2AC16	ZNF181	FGD2							CCND3		PKMYT1								DMXL1	ITGA4		NR1H3	DHDH	CCDC28B	MFSD13A	FAR2
		WTAP	XAF1	ZEB2		VMO1	VSIG4							SLC38A6	PROS1		HYI			WDR17	PLEKHA6	PALM2AKAP2	KLHDC8B	ARRB2							CLEC7A		KIFC1								DMXL2	ITGA6		NUBP1	DHRS2	CCDC40	SIGLEC12	KHK
		ZEB2	ZEB2	ZFP36L1		VSIG4	WARS							SLC38A7	PTMS		IDH2			PPIAP2	KDR	RTKN	ZNF491	PFN1							RCSD1		ICMT								DNAJB11	ITGAL		NUF2	DISP1	CCDC57	ZFYVE28	AFMID
		ZFP36	ZFP36L1			ZFAS1	YBX1							SLC40A1	PTPMT1		IFI27L1			MAST1	FLJ30679	FBXO15	ABHD12	ARL6IP5							MBNL1		PAICS								DNAJC5	ITGAX		OAT	DNAH11	CCDC85B	TFCP2L1	BTBD8
														SMIM3	PTPN22		ILF2							TSPO							ASGR2		NME1								DNASE2	ITGB2		OLFML2B	DNAJC5B	CCDC85C	IL7R	NUMB
														SMIM4	RARA-AS1		INCENP							FKBP8							DMXL2		CDCA5								DOCK4	ITGB2-AS1		OR2AT4	DNASE1L3	CCDC88C	IQCG	PSTPIP1
														SMPDL3A	RBMS2		IQGAP3							LRRFIP1							ENTPD1		KIF23								DOCK10	ITPR1		OSBPL3	DNASE2	CCDC9B	ARG2	FOLR3
														SMS	RBP4		ITGB3BP							CALM3							KCNE3		SMC3								DOK2	JAML		PAX8-AS1	DNMBP	CCL1	ARC	FGFR1
														SOAT1	RDH10		KDELC2							SH3BP1							SET										DRAM2	JARID2		PCAT1	DOCK4	CCL22	MYO5A	XYLT2
														SOD2	REEP5		KIF2C							PCGF5							RXRA										DUSP16	JPT2		PCBD1	DPP4	CCL24	CYP1B1	MYL9
														SPP1	RETREG1		KIF4A							ZBTB7A							LGALS1										DYRK2	JUN		PCBP1-AS1	DUSP16	CCNA1	PSAT1	CLEC2B
														STAB1	RGCC		KIF11							RASSF5							PGLS										DYSF	KCNAB1		PDCD1LG2	DYRK3	CCND1	FOXRED2	PINK1
														STARD13	RMDN3		KIF14							ICAM4							RPS3A										EBI3	KCNMA1		PDCD6IP	EDNRB	CCND3	NREP	RHOBTB2
														SWAP70	ROGDI		KIF15							EIF3L							RPS28										EDEM3	KCNMB1		PDE3A	EEPD1	CCPG1	TTYH3	PDK2
														SYNE1	S100A13		KIF18A							MAFB							APLP2										EEPD1	KCNN4		PIAS1	EFNA5	CCR2	CXCL8	ARMCX2
														TCF12	SCCPDH		KIF18B							RAB8A							MBOAT7										EHD4	KCTD12		PIK3AP1	EIF2A	CD14	SUCNR1	CRIM1
														TCN2	2011-09-01		KIF20A							PNISR							TUBA4A										EIF2AK2	KIAA0513		PLA2G4A	EIF2S3	CD1D	TPPP	CREB3L4
														TDP2	SERINC2		KIF20B							GRK6							TMEM170B										EIF4G3	KIAA1191		PLEKHB1	EIF4B	CD1E	ENTR1	SH3RF3
														TGFBI	SERPING1		KIF22							DOK2							PABPC1										ELL2	KLF4		PLEKHH3	ELL	CD244	GLUL	CBX8
														TMEM37	SH3BP5		KIF23							PYCARD							VCL										ELMO1	KLF10		PMFBP1	ELL2	CD248	GRB10	BTN3A1
														TMEM123	SLC27A3		KIFC1							HCLS1							RASGRP2										ENC1	KTN1		PPIAL4G	ENC1	CD300C	DYRK3	CHST14
														TMEM176A	SORT1		KNL1							SH3BGRL3							COX7A2L										ENG	KYNU		PPIF	ENKD1	CD44	BOLA2B	CACNB3
														TMEM176B	SOWAHD		KNSTRN							SNX18							WDR74										ENPP4	LAMC1		PPM1L	ENOSF1	CD52	AP1B1	ASF1B
														TMIGD3	SPN		KNTC1							LGALS9							UBE2R2										ENTR1	LDHA		PRDM1	ENPP2	CD6	GJB2	ATG2A
														TNFRSF1B	SPOCD1		KPNA2							ARPC4							SH3KBP1										EPAS1	LEPROT		PTAFR	ENTHD1	CD69	CIR1	FN1
														TNFRSF14	SPRY1		LDHA							SUPT4H1							EIF3H										EPB41L3	LFNG		PTPRO	ENTPD8	CD72	CYB561A3	SPINT1
														TNS1	STAC		LDHB							CPPED1							HIPK3										EPDR1	LGALS2		RAB10	ENTR1	CD79A	SULT1C2	CXCL5
														TPCN1	STMN1		LIG1							N4BP2L2							ACTB										EPHB2	LGALS3		RAB20	EPAS1	CDA	NPL	MCM7
														TPD52L2	STON1		LIN9							ITGA4							CDC42SE1										EPS15	LILRA1		RAB42	EPB41L3	CDC42EP3	NPC1	HPGD
														TPP1	SVIL		LMNB1							RELT							MYO1G										ETNK1	LILRA2		RACGAP1	EPOR	CDC42EP4	PLD6	DCSTAMP
														TRIM47	TANC2		LMNB2							CYFIP2							SULF2										ETS2	LILRB3		RALB	EPSTI1	CDC42EP5	VSIG10L	PLEKHG3
														TRPS1	TBC1D10C		LRP11							MTHFS							LILRB2										ETV5	LIMD2		RANBP9	ERRFI1	CDCP1	JAG1	TMEM74B
														TSPAN4	TCF7L2		LRR1							RALB							GPSM3										EXT1	LINC00294		RAPGEF1	ETS2	CDCP2	GADD45B	ZNF439
														TTYH3	TEX14		LSM2							CNIH4							RPS11										F13A1	LINC00847		RBP2	ETV5	CDH1	DHDH	ZSWIM4
														TUBA1C	TFRC		LSM3							CEBPA							RPS15A										FABP4	LINC01010		RBPJ	F13A1	CDK14	DCUN1D3	AMOTL1
														TYMP	TGM2		LSM4							H1FX							APOBR										FABP5	LINC02185		RCBTB2	FABP5	CDK2AP1	CD300A	PBXIP1
														UBE3A	TLCD2		LSM5							ZFAND5							RPS14										FAM3C	LITAF		RCN3	FAH	CDKN2A	OSGIN1	ATF3
														UCP2	TMEM53		MAD2L1							CAMK1							CEBPB										FAM13A	LMTK2		RESP18	FAM161B	CDKN2B	PRR15	TNFAIP8L1
														WIPF1	TMEM91		MAD2L2							TBXAS1							FKBP1A										FAM20A	LRCH1		RGL1	FAM174B	CDKN2D	SEMA4A	KAT6B
														ZFP36L1	TMSB4X		MAGOHB							CCDC88C							RPL12										FAM49A	LRFN4		RHEBL1	FAM198A	CEACAM1	ARMC9	KCNK13
														ZNF703	TNFSF12		MASTL							PIK3AP1																	FAM91A1	LRP8		RHO	FAM198B	CEACAM8	DHCR7	ITPRIP
															TNNI2		MCM2							ARPC2																	FAM98A	LRPPRC		RHOQ	FAM20A	CEBPA	VAV3	NIPSNAP1
															TREM2		MCM3							SNRPB																	FAM168A	LRRC8B		RIN2	FAM49A	CEBPB	KIAA0319	PRKACB
															TRPV2		MCM4							TMEM134																	FAS	LRRC8D		RIN3	FBLIM1	CELSR2	STMN1	ZFYVE9
															TST		MCM5							OAZ1																	FBLIM1	LRRK2		RNF135	FBLN5	CENPV	SYTL3	PHLDA3
															TTC39B		MCM6							RPL14																	FBLN5	LSM4		RNF175	FBXO16	CES3	APLN	DUSP6
															TXN		MCM7							PHF19																	FBN2	LSP1		RNVU1-18	FCER1G	CES4A	RAB42	CD14
															TXNIP		MCM8							CD47																	FBXL19	LST1		RPL23AP87	FCGBP	CFP	ZNF296	PELI3
															UBB		MCM10							APOBEC3C																	FCGR3A	LTA4H		RPRD2	FCGR3A	CH25H	ASNS	CEBPA
															UNC5B		MELK							RALY																	FCGRT	LTB4R		RTCA-AS1	FCGRT	CHI3L1	ALDH1L2	RAP1GAP2
															USP30-AS1		MGST1							CDA																	FGD2	LUCAT1		SCARB1	FFAR2	CHI3L2	SAMSN1	SPSB3
															VMO1		MIS18A							RASAL3																	FLI1	LYST		SCARB2	FFAR3	CHIC2	DYRK4	STING1
															VSIG4		MIS18BP1							JUNB																	FNBP1	LYZ		SDC3	FHAD1	CHIT1	ADAP2	NTHL1
															VTN		MKI67							PRR13																	FPR3	M6PR		SDHAP3	FHIT	CHMP1B	SLC36A1	VSIG4
															YARS2		MND1							SH3BP2																	FRMD4A	MALAT1		SDHB	FKBP11	CHRD	PTX3	HERC5
															ZMYND15		MNS1							MSN																	FRMD4B	MAP3K3		SH3GL1	FLNB	CHST14	PMP22	GBP2
															ZNF706		MPHOSPH9							ACTR3																	FUCA1	MAP3K11		SH3PXD2B	FMN1	CHST2	CREM	IRS2
																	MRPL51							SLC31A2																	FZD1	MAP3K20		SIT1	FMNL2	CHST3	PRX	SPATA6
																	MSH2							SH2D3C																	FZD5	MAPKAPK3		SLAMF1	FMO5	CISH	FOLR2	TBC1D10C
																	MTFR2							MAP2K3																	GAL	MATK		SLC16A7	FOLR2	CITED2	PSTPIP2	HIVEP3
																	MXD3							TMC6																	GAL3ST4	MBD2		SLC1A3	FOXRED2	CITED4	DYSF	BICD1
																	MYBL2							GNAI2																	GALC	MCCC2		SLC39A8	FOXS1	CKAP4	NCF4	NID1
																	MZT1							FLNA																	GALM	MED21		SLC45A4	FPR3	CLCN2	WDR83	CSPG4
																	MZT2A							STK10																	GAPT	MFN2		SLC4A7	FSTL1	CLDN23	GTF2IRD2B	SLC45A3
																	MZT2B							RPL5																	GAS6	MGAT1		SLC7A8	FTL	CLDN7	ADCY3	ROGDI
																	NAP1L4							PDLIM2																	GAS7	MGST1		SLC9A9	FUCA1	CLEC12A	ABLIM3	CCDC28A
																	NASP							HIGD2A																	GATD3A	MID1IP1		SMCO4	FXR1	CLEC12B	PCSK6	DNASE2B
																	NCAPD2							HMGN2																	GATM	MKI67		SMIM20	FZD3	CLEC4D	CPEB2	ZFTA
																	NCAPD3							SCIMP																	GCNT1	MMP2		SNORA115	FZD5	CLEC4E	GAS7	LONRF1
																	NCAPG							SHKBP1																	GDE1	MMP2-AS1		SNORD151	G0S2	CLEC6A	MAOA	PGM5
																	NCAPG2							EIF3H																	GDPD1	MNDA		SORBS2	GAB2	CLIC3	ADAMTS15	ATP10A
																	NCAPH							PSMA4																	GFRA2	MOB1A		SPIC	GAB3	CLIP2	COBLL1	SIGLEC14
																	NCAPH2							BCL2A1																	GGA2	MPP7		SPTLC3	GADD45B	CLSTN3	MB21D2	FBN1
																	NDC80							UNC93B1																	GIMAP1	MRAS		SRBD1	GAL3ST4	CLU	STXBP1	NFAM1
																	NEIL3							SLC24A4																	GIMAP4	MTF1		SRP14	GALNT3	CNTNAP1	NCR3LG1	LPCAT4
																	NEK2							ARRDC1																	GIMAP6	MTMR6		SRSF7	GAPT	COBL	GREB1	BBC3
																	NET1							CIRBP																	GIMAP7	MXI1		SSH2	GATM	COL11A2	PIK3R3	KIF3C
																	NETO2							TMPO																	GIMAP8	MYBL2		STAB1	GBGT1	COL18A1	SLC7A6	BAHCC1
																	NFATC2IP							NCF2																	GJB2	MYC		STEAP3-AS1	GCNT3	COL1A1	ME2	LZTFL1
																	NR2C2AP							PSMB10																	GLMP	MYD88		STIM1	GCSAM	COL22A1	MTFP1	PDE3B
																	NRGN							MTMR11																	GLUL	MYLIP		STON2	GCSAML	COL5A3	SLC38A6	EIF4EBP3
																	NSD2							CAP1																	GNPDA1	MYO1F		SULT1A1	GFRA2	COL8A2	ADM	S100A16
																	NUCB2							PTPN18																	GOLIM4	NAA15		TACR1	GIMAP2	COL9A2	ITGB3	LRIG1
																	NUCKS1							RARA																	GOLT1B	NAA50		TAS2R41	GIMAP5	CORO2A	CD40	NR4A3
																	NUDT1							CALHM2																	GPBAR1	NAP1L1		TBC1D1	GJA3	COX5B	SMPD1	USP2
																	NUF2							TADA3																	GPR34	NARS		TBC1D14	GLB1L	CPAMD8	BRCA2	MCEMP1
																	NUP210							CASP4																	GPR35	NBEAL2		TBXAS1	GLMP	CPE	DEXI	COL5A3
																	NUPR1							TMEM154																	GPR84	NCF1		TCF12	GLUL	CPED1	NINJ1	COL8A2
																	NUSAP1							MKRN1																	GPR107	NCF2		TECR	GNA15	CPNE6	ABCA5	TNNI2
																	OIP5							SSNA1																	GPR155	NCLN		TET3	GNPDA1	CRABP2	GNPDA1	ZFHX2
																	ORC6							CCM2																	GPR160	NDRG1		TEX22	GOLGA6L4	CRACR2B	SDSL	SLC6A12
																	OXCT1							SSBP4																	GPR183	NDUFB3		TEX41	GOLGA7B	CREB3L4	C12orf4	SLC1A4
																	PAFAH1B3							PLAGL2																	GRAMD4	NEAT1		THNSL2	GOLGA8H	CREBRF	STAC	EPOP
																	PARP2							GSTK1																	GSDMA	NEK6		TIFAB	GOLGA8R	CRHR2	KCNJ5	LFNG
																	PARPBP							RPL26																	GSDMD	NES		TLR4	GOSR2	CRIM1	MPP1	CSF1R
																	PBK							VMP1																	GTF2F1	NFAM1		TMEM26-AS1	GPHN	CRIP1	AP2A2	MARCHF1
																	PCLAF							HLA-E																	GYPC	NHSL2		TMEM87B	GPNMB	CRIP2	FZD5	DOCK6
																	PCNA							SNX10																	GZF1	NLRC5		TPPP3	GPR137B	CRISPLD2	TMEM138	PNRC1
																	PCNT							HRH2																	H1F0	NLRP12		TPRG1-AS1	GPR155	CROCC	HPS4	PSIP1
																	PDLIM1							ZRSR2																	H1FX	NMT2		TRIB1	GPR160	CSGALNACT1	ARID3A	CCDC85C
																	PGP							AMPD2																	H2AFJ	NRGN		TSEN15	GPR183	CSPG4	STARD3	MYBPC3
																	PHF19							TLE4																	HAVCR2	NUMB		TSPYL5	GPR34	CSRP2	LINS1	AKR1C3
																	PHGDH							LYPLA1																	HCLS1	NUP210		TTYH3	GPR35	CST6	COL6A3	NLRP3
																	PHLDA3							DOCK5																	HCP5	OAF		TXNL1	GRAMD4	CTNNAL1	CTSL	PTPRE
																	PIGX							GIMAP2																	HECTD2	OLFML3		UBASH3B	GRAP	CTPS1	BIRC3	HBP1
																	PKMYT1							ANKRD13D																	HELZ	OLR1		UBE2R2	GRAPL	CTSF	TUBA4A	GPT2
																	PKP4							SSH2																	HESX1	OSTM1		UC.134	GRB10	CTSW	ABHD12	SNAI3
																	PLK1							RPL30																	HGSNAT	OXSR1		ULK2	GRIN3A	CTTN	ANKRD9	PYCARD
																	PLK4							DBNL																	HINT3	P2RX7		VAV1	GSDMA	CTXN1	SCD	SFXN2
																	PLP2							ABHD3																	HIST1H2AC	P2RY8		WDFY3-AS2	GSDME	CX3CL1	ST8SIA4	HILPDA
																	POC1A							PAIP2																	HIST2H2BE	P2RY13		WIPF1	GTF2F1	CXCL16	SCARB1	NDRG2
																	POLA2							DOCK8																	HK1	PA2G4		XIRP1	GTF2IRD2	CXCR5	GDF15	ADORA1
																	POLD2							PSME1																	HLA-DOA	PADI2		YPEL2	GTF2IRD2B	CXorf65	ARHGAP27	CBR3
																	POLD3							EIF3F																	HLA-DQA1	PAG1		YTHDF3-AS1	GTPBP8	CXXC5	PFKFB3	VSIR
																	POLE2							ARPC5																	HLA-E	PAICS		ZBTB25	GUCY2F	CYBB	RCBTB2	SYNGR1
																	POLE3							ANP32B																	HMOX1	PAK2		ZC3H12C	GZF1	CYFIP2	BLNK	ITGA4
																	POLQ							RPL31																	HNMT	PCYOX1L		ZC3H12D	HAMP	CYP4F22	EPAS1	IFNLR1
																	PPIC							RAB24																	HOMER3	PDE3B		ZFP36L1	HAVCR2	CYTIP	SCML1	PTAFR
																	PPIH							KRAS																	HPS5	PDE7A		ZNF689	HDX	DBN1	DCXR	MAML3
																	PPM1G							TPM3																	HRH1	PDK4		ZNF710-AS1	HEBP1	DBP	MYO1G	VNN2
																	PPP1CC							DPEP2																	HS3ST1	PDLIM7		ZRSR2	HEBP2	DCHS1		RGS3
																	PRC1							SSR2																	HSD17B14	PFAS		ZSWIM6	HECTD2	DCLK2		SVIL
																	PRIM1							PSMD4																	HSP90B1	PGAM1			HIF1A	DCSTAMP		CES4A
																	PRIM2							CCZ1																	HSPB1	PGD			HIST1H3D	DDI2		SIGLEC16
																	PRKDC							EIF4E2																	HTR2B	PHB			HMOX1	DDIAS		CAPN5
																	PRPS2							CD55																	HTR7	PICALM			HOMER3	DECR1		CDC42EP4
																	PRPSAP1							EIF4A2																	IDH1	PID1			HPGDS	DEFB1		TAF4B
																	PRR11							S100A11																	IDH2	PIEZO1			HPS1	DEGS2		RNF24
																	PRRG4							RNF144B																	IER5	PIGW			HPS4	DGAT2		KDELR3
																	PSIP1							CCNI																	IFIH1	PIM1			HPSE	DGKG		NCAPH
																	PSMC3							EIF3D																	IFIT1	PKM			HS3ST1	DHRS11		ACSM5
																	PSMC3IP							LSM6																	IFNGR2	PLAUR			HS3ST2	DIAPH1		RPS6KA5
																	PTMA							CD300C																	IFT122	PLBD1			HSD17B14	DIO1		VASN
																	PTMS							OXA1L																	IGF1	PLIN3			HSF4	DIRAS2		SESN3
																	PTTG1							HSD17B11																	IGFBP4	PLPP3			HTR2B	DIRC2		HDAC5
																	PXMP2							PPM1G																	IKBKB	PLXNA1			ID3	DISP2		MATK
																	RACGAP1							CCDC57																	IL2RA	PMAIP1			IDH1	DIXDC1		FSCN1
																	RAD18							MRPS35																	IL7R	PMP22			IER3	DLC1		MT2A
																	RAD21							PPCDC																	IL10	POLR1A			IFI44	DLX3		LTA4H
																	RAD51AP1							CNN2																	IL10RA	POLR3D			IFI44L	DLX4		CLEC6A
																	RAD51C							AIP																	IL13RA1	PPARGC1B			IFI6	DMWD		P2RY13
																	RALY							MYL6																	IL18	PPIF			IFIT1	DNAJA4		TTC30A
																	RAN							AGTRAP																	IL18BP	PPT1			IFITM10	DNAJB5		EREG
																	RANBP1							RPL11																	IL21R	PRAM1			IFRD1	DNASE2B		TTC30B
																	RASSF8							RNH1																	INPPL1	PRKCB			IGF1	DOCK3		RASSF5
																	RBBP7							TUBA4A																	INSIG1	PRKCH			IGF2BP3	DOCK6		EXT1
																	RBBP8							NOL7																	INTS6L	PRKDC			IGFLR1	DPYSL3		NR3C2
																	RBP4							2006-09-01																	IQCE	PRPS2			IL10	DRAXIN		ADGRE2
																	RCCD1							ARRB1																	IQGAP2	PRXL2B			IL18	DSCAML1		IL27RA
																	RDX							DUSP6																	IRF2BPL	PSKH1			IL18BP	DSP		ABTB1
																	RECQL4							LSM10																	IRF8	PTK2B			IL1A	DUSP13		LAT2
																	RFC1							RPL27A																	ISCU	PTPN12			IL1R2	DUSP2		NPR1
																	RFC3							HAGH																	ITGA9	PTPN13			IL2RA	DUSP5		TCF7L2
																	RFC4							RBCK1																	ITGAV	PTPN22			IL4I1	DUSP7		PLAAT4
																	RFC5							RPL18A																	ITGB5	PTPRE			IL6	ECE1		RIMBP3
																	RHEB							HMOX1																	ITM2B	PUS7			IL7R	ECSCR		ABCG1
																	RMI1							RBM3																	ITPR2	RAB27A			INPP4B	EDEM3		FOXO1
																	RMI2							SNX20																	ITSN1	RABL3			INTU	EFNA1		CLU
																	RPA2							EIF3K																	IVNS1ABP	RAC2			IPO4	EFNB1		SPOCD1
																	RPA3							RGS18																	KCNMB4	RAF1			IQCD	EFR3B		GPBAR1
																	RPL39L							FLI1																	KCTD5	RAI14			IRAK2	EGLN3		RHOF
																	RRM1							PABPC4																	KDM7A	RASAL2			IRF7	EGR2		BTG1
																	RRM2							WDR11																	KIAA0319L	RAVER1			ISG15	EHD3		NUAK2
																	S100A13							RPL35A																	KIF5B	RNF141			ITGA9	EIF4EBP3		ROBO3
																	SAC3D1							LMO2																	KIF16B	ROCK1			ITGB8	ELOVL3		SPATA13
																	SAE1							ARAP2																	KIF20B	RPL4			ITSN1	EMP2		FAXDC2
																	SAP30							STK17B																	KIFAP3	RPL10A			JDP2	ENHO		JADE2
																	SASS6							CCDC115																	KITLG	RPS27L			JPT2	EPB41L4A		KCNMB1
																	SGO1							LCP1																	KLF3	RRP12			JUN	EPHA1		PALD1
																	SGO2							MBD2																	KLF7	RSL1D1			KALRN	EPHB6		AVPI1
																	SHCBP1							GLIPR1																	KLHL13	RTN1			KANK1	EPOP		ARID5B
																	SHMT1							GAPT																	LACC1	RTN4R			KCNH4	EPS8L2		CRIP1
																	SIVA1							SLC43A2																	LAG3	RXRA			KCNIP2	ERCC4		GPD1
																	SKA1							ERGIC1																	LAIR1	S100A4			KCNJ5	EREG		S1PR4
																	SKA2							ROGDI																	LAP3	S100A6			KCNMB3	ESPN		CORO6
																	SKA3							RSL1D1																	LAPTM4A	S100A8			KCP	ETNK2		GPA33
																	SLC2A4RG							MAP3K1																	LCP1	SAR1B			KCTD7	EVPLL		GLDN
																	SLC25A5							SUN2																	LDLR	SCAMP2			KEL	EXTL1		KLF5
																	SLF1							BLOC1S1																	LDLRAD4	SCIMP			KIAA1551	F2R		GSTM2
																	SLFN13							CRBN																	LGI2	SCO1			KIAA1671	F3		OSBPL5
																	SMC1A							GBP2																	LGMN	SDC1			KIF16B	F5		APOL3
																	SMC2							FAM32A																	LILRB5	SDC4			KIF21B	FA2H		MIS18BP1
																	SMC3							FYN																	LINC00937	SDCBP			KITLG	FADS3		NCF1
																	SMC4							NADK																	LMNB1	SEH1L			KLHDC8B	FAHD2B		RTN1
																	SMCHD1							ARHGAP4																	LMO2	SEL1L3			KLRG1	FAIM2		PIK3C2B
																	SNRNP25							UBE2I																	LPAR5	SELENON			KRBOX4	FAM102A		MT1E
																	SNRPB							CAPZB																	LPAR6	SERBP1			LACC1	FAM117B		FNDC10
																	SNRPD1							SERP1																	LPCAT1	SERINC5			LAMA1	FAM124A		FBP1
																	SNRPG							SIRT7																	LPIN2	SERPINA1			LAMB3	FAM131A		ADAMTS7
																	SPAG5							FOXP1																	LRRC4	SETD7			LAMP1	FAM131B		EGR2
																	SPATA33							SF1																	LTBP2	SGK1			LBH	FAM135B		SEL1L3
																	SPC25							IDH3G																	LXN	SGK3			LBX2	FAM13A		PLEKHG6
																	SPDL1							GIMAP7																	LYPLA2	SGMS2			LCA5	FAM156A		LMNB1
																	SRPK1							TSC22D4																	MACF1	SH3BGRL3			LENG1	FAM189A2		JUP
																	STIL							RPL10A																	MAEA	SH3PXD2B			LEP	FAM19A3		CHI3L1
																	STMN1							NAA10																	MAF	SH3RF3			LETMD1	FAM222A		MYO7B
																	SUMO2							RIN3																	MAFB	SIGLEC7			LGI2	FAM89B		LYPD5
																	SUPT16H							SEC11A																	MAN1C1	SIGLEC15			LGMN	FAM92A		AXL
																	TACC3							RPL10																	MAP7	SIRPB2			LHFPL2	FANCE		POU2F2
																	TAGLN2							ARID3A																	MAP11	SKI			LILRA4	FANCF		GBP4
																	TCF19							MXD3																	2006-03-01	SLAMF7			LILRA6	FAR2		SLC31A2
																	TDP1							CD300E																	2009-03-01	SLC1A5			LILRB5	FAXDC2		FBXO32
																	TEX30							CFL1																	MARCKS	SLC5A3			LIMD1	FBF1		MTURN
																	TFDP1							CAPZA2																	MBD4	SLC7A1			LINS1	FBP1		SIGLEC11
																	TIFA							TMEM9B																	MBNL1	SLC7A11			LMAN1	FBXL16		DISP2
																	TIMELESS							RPS4X																	MBNL2	SLC9A1			LOC100652833	FBXO2		ZNF385A
																	TK1							HADHA																	MCOLN1	SLC16A1			LOC101928422	FBXO31		LRFN1
																	TMEM97							CLEC7A																	MEF2C	SLC16A3			LOC101929599	FBXO32		ITGA3
																	TMEM106C							BTG1																	MERTK	SLC16A6			LOC101929895	FCAR		ABCB9
																	TMEM107							LEPROTL1																	METTL7A	SLC17A9			LOC102724250	FCER2		RASGRP1
																	TMEM160							SRSF5																	MFSD1	SLC20A1			LOC102724994	FCGR2B		GPC4
																	TMPO							COMMD7																	MFSD12	SLC22A4			LOC105371921	FCN1		KCNA3
																	TMPO-AS1							DUSP5																	MGAT4A	SLC25A5			LOC105373985	FCRL6		KL
																	TOP2A							COX7A2L																	MGAT5	SLC25A29			LOC107984026	FCRLA		CHST3
																	TOPBP1							SVIL																	MGLL	SLC25A37			LOC107985911	FCRLB		PDK4
																	TPR							IMPDH1																	MILR1	SLC26A11			LOC107986351	FDXACB1		RNF122
																	TPRKB							NUDT16																	MKNK1	SLC27A1			LOC107986453	FER1L6		ADGRD1
																	TPX2							CAPNS1																	MMD	SLC27A3			LOC107987351	FFAR4		DGAT2
																	TRIM59							TRAPPC1																	MMP19	SLC29A1			LOC107987433	FGD5		SORBS1
																	TRIOBP							SNAP23																	MMP25	SLC29A3			LOC112268331	FGFR1		NOL4L
																	TRIP13							VPS28																	MPEG1	SLC47A1			LOC112268345	FGFR3		LRRC75A
																	TROAP							TERF2IP																	MPP1	SLK			LOC646652	FGFRL1		IQSEC3
																	TTC39C							OTUB1																	MPP5	SMARCD3			LPAR6	FGL2		ATP8B3
																	TTF2							GYG1																	MRC1	SMCO4			LPCAT1	FGR		NNAT
																	TTK							RPS15A																	MRC2	SMIM25			LPO	FHL1		KCNJ2
																	TUBA1B							EIF2S3																	MRO	SNAI3			LRMDA	FIS1		CBX7
																	TUBB							CXCL16																	MS4A4A	SNRPB2			LRRC3	FKBP5		MTMR11
																	TUBB4B							SOX4																	MS4A6A	SOX4			LRRC37B	FLNA		DIXDC1
																	TUBB6							SHISA5																	MS4A7	SPARC			LRRC4	FLRT2		ACKR3
																	TUBG1							ZDHHC1																	MSC	SPN			LTC4S	FLVCR2		CC2D2A
																	TYMS							OXR1																	MSR1	SPOPL			LY96	FNDC10		CREBRF
																	UBE2C							ATG16L2																	MTCH1	SRC			LYSMD1	FOLR1		SOBP
																	UBE2S							BLVRA																	MTSS1	SREBF1			LYVE1	FOLR3		NFE2L3
																	UBE2T							NUMB																	MXD1	SRM			MACC1	FOS		FRAT2
																	UHRF1							CSNK2B																	MYO1E	ST3GAL4			MACF1	FOXO1		GPR75
																	USP1							ZNF580																	MYO5A	ST6GAL1			MAFB	FOXO6		FANCE
																	VDAC3							DAZAP2																	MYO7A	STAM2			MAOA	FRAT1		CYBRD1
																	VPS29							DIAPH1																	MYO18A	STARD7			MAP3K21	FRAT2		PLEKHB1
																	VRK1							LFNG																	NBL1	STAT6			MARCKS	FRMPD2		ARHGEF28
																	WDHD1							RPL23A																	NCF4	STEAP3			MCOLN1	FTH1		P2RX1
																	WDR34							CD68																	NCKAP1L	STK17B			MCOLN3	FURIN		FGL2
																	WDR62							MED4																	NCOA4	STRN			MCRIP2	FUT7		GGTA1
																	WDR76							RGL4																	NDFIP1	SUCLG2			ME2	FXYD2		MAFF
																	WEE1							COX6A1																	NEU3	SULF2			MEF2C	FYN		RASL11A
																	XRCC2							NR1H2																	NEURL3	SULT1A1			MERTK	FZD2		GALNT12
																	YWHAH							PPP1R12A																	NF1	SUSD6			MET	FZD7		FAM13A
																	ZDHHC12							ARHGAP27																	NFATC2	TAF13			MFHAS1	GABBR1		PDZD7
																	ZGRF1							PGK1																	NFE2L1	TANC2			MFSD1	GALK1		TFAP4
																	ZNF93							TNFRSF14																	NFE2L3	TBC1D2			MFSD6L	GALNT12		TMEM121B
																	ZWILCH							PFDN6																	NHLRC3	TBC1D2B			MGAM	GAS1		LILRA1
																	ZWINT							PGAM1																	NINJ1	TEX2			MGAM2	GBP4		YPEL1
																																									NISCH	TFEB			MGAT4A	GCA		ZMYND15
																																									NLN	TFRC			MGLL	GCH1		TNFAIP6
																																									NLRP3	TKT			MILR1	GDF1		CITED2
																																									NMI	TLR8			MIOS	GDPD5		SLC46A2
																																									NMRK1	TM4SF19			MKNK1	GEM		PNPLA7
																																									NORAD	TMEM104			MMP1	GFOD1		KCNN4
																																									NPC2	TMEM121B			MMP10	GIPR		FAM117B
																																									NPL	TMEM131L			MMP8	GJA5		CLEC12A
																																									NUMA1	TMEM192			MPEG1	GJB2		MPZL2
																																									OAS1	TMPO			MPP1	GJB6		UBALD2
																																									OASL	TNC			MPP5	GJD3		TPM2
																																									OAZ2	TNFAIP2			MPPED2	GK		SLIT1
																																									OGDH	TNFSF14			MRO	GLB1L2		SPARC
																																									OIP5-AS1	TNNI2			MRVI1	GLIPR2		MTARC1
																																									OLFML2B	TP53INP1			MS4A6A	GLRX		TNFSF14
																																									OS9	TREM1			MS4A6E	GLT1D1		SLITRK4
																																									OSTF1	TRG-AS1			MSR1	GMFG		RGCC
																																									OTUD1	TRPV4			MTSS1	GNA11		UBALD1
																																									OTUD4	TSEN34			MTSS1L	GNG7		AOC3
																																									P2RX4	TSN			MX1	GNGT2		AQP3
																																									P2RY6	TSPAN14			MYL6B	GP1BA		FOS
																																									PARP9	TSPAN32			MYLK2	GPA33		RIMBP3C
																																									PAX8	TSPO			MYO10	GPAT2		KYNU
																																									PAX8-AS1	TTC19			MYO1G	GPBAR1		VASH1
																																									PBRM1	TTLL4			MYO5A	GPC3		YPEL2
																																									PDCD1LG2	TTLL12			MYO7A	GPC4		VCAN
																																									PDGFC	TTPAL			N4BP2	GPCPD1		CEACAM4
																																									PDIA4	TXLNA			NAALADL2	GPD1		TLR8
																																									PEAK1	TXN			NAIP	GPR132		INHBA
																																									PELI1	TXNIP			NAMPT	GPR146		CYTIP
																																									PFKFB3	TXNRD1			NBL1	GPR153		MYOZ1
																																									PHF1	U2AF1L5			NBPF1	GPR162		NLRP1
																																									PHTF2	UBE2D1			NBPF7	GPR68		TRHDE
																																									PI4KB	UBE2D4			NCF4	GPR75-ASB3		LIMD2
																																									PIGC	UBE2E3			NEB	GPRASP2		FYN
																																									PIK3R5	UBTD2			NEK3	GPRC5B		SLC44A2
																																									PIK3R6	UBXN8			NEU1	GPSM1		MYBPH
																																									PIKFYVE	UBXN11			NEU3	GPT		LGALS2
																																									PITHD1	UPP1			NFKB2	GPT2		SPON2
																																									PKD2L1	URB1			NINJ1	GPX7		LTBP2
																																									PLAU	VARS			NISCH	GRASP		SLC27A3
																																									PLEK	VASH1			NME1-NME2	GRHL1		KLF2
																																									PLEKHA7	VASP			NMNAT2	GRID2IP		TIFAB
																																									PLEKHM2	VCAN			NMRK2	GSN		ABCA2
																																									PLSCR1	VCL			NOL3	GUCY1B1		SHROOM3
																																									PNKD	VGLL4			NOP53	GZMB		NEDD9
																																									POLR2A	VMP1			NOTCH4	H1FX		TRIM54
																																									POR	VSIR			NOXA1	H2AFY2		SLX1B
																																									PPM1K	VWA8			NPC1	H6PD		ANKRD63
																																									PPM1L	WARS			NPL	HAL		GLTPD2
																																									PPM1M	XXYLT1			NPM1	HAP1		PRAM1
																																									PPP1R21	YWHAH			NPTX1	HBA1		SERPINE1
																																									PPP2CB	ZCCHC24			NR6A1	HBEGF		RAB40B
																																									PPP6R3	ZDHHC20			NREP	HBP1		AKAP5
																																									PRDM1	ZFAND3			NRIP2	HCAR2		CITED4
																																									PRDM4	ZFYVE16			NSMF	HCAR3		ANGPT2
																																									PRKCA	ZMIZ1-AS1			NT5DC2	HDAC5		CRABP2
																																									PRLR	ZNF106			NYNRIN	HDAC9		STYXL2
																																									PRNP	ZNF268			OAS3	HEG1		CCND1
																																									PRR5L	ZNF366			OAZ3	HEPACAM		TCP11L2
																																									PRUNE2	ZNF697			ODF3B	HERPUD1		LOC728392
																																									PSMC4	ZNF844			OLFML2B	HEXIM1		KBTBD11
																																									PTCH2				OSGIN1	HIST2H2BE		MAP2K6
																																									PTGER2				OTOA	HIVEP3		CAPN11
																																									PTGFRN				P2RY1	HLA-DOA		CCIN
																																									PTGIR				P2RY11	HMG20B		SLC1A7
																																									PTMS				P2RY8	HMGB2		ALDH5A1
																																									PTPN11				P3H2	HOMER1		TCEA3
																																									PTPRA				PABPC4	HPGD		DDIAS
																																									PTPRJ				PANX1	HRH2		HCAR3
																																									PYGL				PAPSS2	HS6ST1		CCND2
																																									QKI				PAQR7	HSD11B1		SPIRE2
																																									QPCT				PARVB	HSD3B1		SARDH
																																									RAB3IL1				PATJ	HSPA1A		AMIGO1
																																									RAB5C				PCED1B	HSPA1B		NOTCH3
																																									RAB7B				PCGF1	HSPA2		ARHGEF17
																																									RAB9A				PCOLCE2	HSPBAP1		PID1
																																									RAB32				PCSK6	HSPG2		RMI2
																																									RAB35				PDCD1LG2	HVCN1		ODF3L1
																																									RAB42				PDGFB	ICAM3		COL1A1
																																									RAD51AP1				PDPN	ICAM4		ARAP3
																																									RAP2A				PFKM	ICAM5		CLEC12B
																																									RB1				PGA3	IFNLR1		PDCD4
																																									RBM47				PGA4	IGF1R		HCAR2
																																									RBMS1				PGAP1	IGFBP2		NES
																																									RBP1				PGAP2	IGFBP6		TBX21
																																									RCN3				PGBD1	IGSF8		COL22A1
																																									REEP4				PGLYRP4	IKBKE		CDA
																																									REPS2				PHLDB3	IL17RA		PODXL
																																									RERE				PIK3C2A	IL1R1		TSPAN32
																																									RESF1				PIK3R6	IL1RN		PELI2
																																									RFFL				PITHD1	IL21R		NRGN
																																									RGL1				PKD1L3	IL27RA		PLAC8
																																									RHOB				PKD2L1	IL2RG		YPEL4
																																									RHOBTB1				PKN1	IMPA2		FRAT1
																																									RHOQ				PLA2G7	INAVA		C11orf21
																																									RHOU				PLAU	INHBA		ANGPT4
																																									RHPN1				PLBD2	INO80C		ADRA2B
																																									RIC1				PLCD4	INPP5K		OCSTAMP
																																									RN7SL138P				PLD6	IPP		RASGRP2
																																									RNASE1				PLEKHA5	IQSEC3		FAM135B
																																									RNASE6				PLEKHM1	IRAK3		CD1D
																																									RNASET2				PLEKHO2	IRS1
																																									RNF13				PLOD2	IRS2
																																									RNF19B				PLPP3	ISOC1
																																									RNF114				PLXNA3	ISYNA1
																																									RNF135				PLXNC1	ITGA1
																																									RNF145				PMFBP1	ITGA3
																																									RPL7AP6				PMP22	ITGA5
																																									RPS6KA2				POLR1D	ITGA6
																																									RRM2				POU6F1	ITGA7
																																									RTCB				PPM1L	ITGAL
																																									RTL5				PPP1R14C	ITGAM
																																									RUBCN				PPP1R15A	ITIH4
																																									RUFY4				PRDM1	ITM2C
																																									RUNX3				PRELID3A	ITPRIP
																																									S1PR1				PRKAB2	JADE2
																																									SAMD4A				PRLR	JAML
																																									SAMD8				PRR5L	JMY
																																									SAMD9				PRRG1	JUNB
																																									SAMSN1				PRX	JUND
																																									SASH1				PSAP	JUP
																																									SAT1				PSAT1	KANK3
																																									SBDS				PTPDC1	KANK4
																																									SCAMP5				PVALB	KAT6B
																																									SCARB2				PYGL	KAT8
																																									SCCPDH				PYHIN1	KAZALD1
																																									SDC3				PYROXD2	KAZN
																																									SDF2				QKI	KBTBD11
																																									SEC23B				QPRT	KCNA2
																																									SECISBP2L				RAB32	KCNH3
																																									SELENOP				RAB33A	KCNJ1
																																									SELL				RAB39A	KCNJ15
																																									SEMA4A				RAB3IL1	KCNJ2
																																									SERINC1				RAB42	KCNK13
																																									SERPINB2				RAB5C	KCNK5
																																									SESN1				RACK1	KCNMB1
																																									SETX				RAG1	KCNN4
																																									SFMBT2				RALA	KCNQ1
																																									SFXN1				RAP2B	KCTD1
																																									SGMS1				RAPGEF5	KCTD15
																																									SGPL1				RASGRP4	KDELR3
																																									SGPP2				RASSF2	KDR
																																									SGTB				RBBP9	KIAA1210
																																									SH2B3				RBP1	KIAA1755
																																									SH3GL1				RCN3	KIF17
																																									SH3KBP1				RDH12	KIF20A
																																									SH3PXD2A				REPS2	KIF3C
																																									SH3RF1				RFX3	KLF2
																																									SHMT1				RGL1	KLF4
																																									SIGLEC1				RGS1	KLF9
																																									SIGLEC14				RHBDD3	KLHDC7B
																																									SIN3B				RHOBTB3	KLHL24
																																									SIPA1L1				RHOG	KLHL3
																																									SIPA1L2				RHOU	KLHL30
																																									SLC2A8				RIC1	KLK1
																																									SLC4A7				RIMS3	KLK13
																																									SLC7A8				RMDN3	KMT5C
																																									SLC9A9				RNASE1	KPTN
																																									SLC11A2				RNASE6	KREMEN1
																																									SLC16A7				RNASET2	KRT4
																																									SLC18B1				RND3	KRT78
																																									SLC22A23				RNF141	KRT79
																																									SLC25A24				RNF145	KSR1
																																									SLC31A1				RNF19B	KYNU
																																									SLC35F6				RPL10	LAPTM4B
																																									SLC36A1				RPL12	LAT
																																									SLC37A4				RPL17-C18orf32	LAT2
																																									SLC38A6				RPS5	LCNL1
																																									SLC38A7				RPS6KA2	LCP1
																																									SLC40A1				RRAGD	LDHD
																																									SLC45A4				RSAD2	LDLRAP1
																																									SLC46A1				RTCA	LEPROTL1
																																									SLC49A4				RTL10	LFNG
																																									SLCO2B1				RUBCNL	LGALS12
																																									SMAP2				RUFY2	LGALS2
																																									SMG6				RUNX2	LHB
																																									SMIM3				RUNX3	LHPP
																																									SMOX				S1PR1	LIF
																																									SMURF2				SAMD4A	LILRA1
																																									SNHG12				SAMSN1	LILRA2
																																									SNN				SAT1	LILRB1
																																									SNX1				SCD	LIMD2
																																									SNX2				SCML1	LINGO1
																																									SNX6				SCN9A	LIPG
																																									SNX8				SDS	LIPT2
																																									SNX9				SEC14L5	LMO4
																																									SNX11				SELENOP	LMTK2
																																									SNX18				SEMA3C	LOC100130370
																																									SNX24				SEMA5A	LOC100507507
																																									SORBS3				SEMA6A	LOC100652901
																																									SPATS2L				SEMA6B	LOC101927844
																																									SPP1				SENP7	LOC101928095
																																									SPRED1				SERPINB2	LOC101929400
																																									SPTLC3				SERPINB6	LOC102724770
																																									SQLE				SGPL1	LOC102725180
																																									SRGAP2				SGSH	LOC105369246
																																									SRGAP2B				SGTB	LOC105370687
																																									SRGAP3				SH3D21	LOC105375112
																																									SRSF7				SH3KBP1	LOC107986910
																																									SSB				SHROOM1	LOC112268076
																																									SSBP2				SIDT1	LOC112268219
																																									ST8SIA4				SIGLEC1	LOC112268238
																																									STAB1				SIGLEC7	LOC112268384
																																									STARD3				SIRT2	LOC728392
																																									STARD10				SLC11A2	LONRF1
																																									STAT2				SLC15A2	LOXHD1
																																									STAT4				SLC15A4	LPCAT2
																																									STAU1				SLC17A7	LPCAT4
																																									STRN4				SLC22A23	LRGUK
																																									STX7				SLC25A19	LRIG1
																																									STX12				SLC25A48	LRP3
																																									SUSD1				SLC25A6	LRP5
																																									SYNE1				SLC2A5	LRRC20
																																									SYNGR2				SLC2A8	LRRC75A
																																									SYNJ1				SLC30A4	LRRC75B
																																									SYPL1				SLC35F6	LRRC8A
																																									TADA3				SLC36A1	LRRCC1
																																									TAGAP				SLC38A6	LSR
																																									TBC1D4				SLC38A7	LTA4H
																																									TBC1D9B				SLC39A8	LTB
																																									TBC1D13				SLC40A1	LTBP2
																																									TCEAL3				SLC43A2	LY6E
																																									TCF4				SLC46A1	LY75
																																									TCF12				SLC7A11	LY9
																																									TCN2				SLC7A8	LYST
																																									TDRKH				SLC9A9	LZTS3
																																									TENT2				SLCO2B1	MACROD1
																																									TESK2				SLIT3	MAFA
																																									TFE3				SMG9	MAFF
																																									TGFBI				SMIM29	MAML3
																																									TGM2				SMIM4	MAMLD1
																																									THBS1				SMOX	MAN1C1
																																									TIFAB				SMS	MANEAL
																																									TIMP3				SMURF2	MANSC1
																																									TLE4				SNCA	MAOB
																																									TLR4				SND1	MAP1A
																																									TM2D2				SNX24	MAP1LC3A
																																									TMEM37				SNX5	MAP2K3
																																									TMEM65				SNX6	MAP2K6
																																									TMEM86A				SORBS3	MAP3K5
																																									TMEM97				SORD	MAP4K1
																																									TMEM106A				SPP1	MAP6D1
																																									TMEM119				SPTBN4	MAPK8
																																									TMEM123				SRGAP1	MARVELD1
																																									TMEM140				SRPX	MATK
																																									TMEM150B				ST18	MC1R
																																									TMEM189				ST8SIA6	MCAM
																																									TMEM266				STAB1	MCEMP1
																																									TMEM268				STAG3	MCL1
																																									TMIGD3				STAP1	MCU
																																									TNFAIP8				STARD3	MDGA1
																																									TNFRSF11A				STAT4	MDK
																																									TNFSF8				STEAP1B	MDP1
																																									TNIK				STON2	MEFV
																																									TNRC18				STOX2	MEGF9
																																									TNS3				STRIP2	METTL7B
																																									TOMM20				SV2B	METTL9
																																									TOP1				SWAP70	MFAP4
																																									TOR1B				SYNDIG1L	MFSD12
																																									TP53INP2				SYNM	MFSD2A
																																									TPD52				SYT1	MFSD4A
																																									TPD52L2				SYTL3	MFSD6
																																									TPK1				TAF1D	MGAT3
																																									TPRA1				TBC1D14	MGST1
																																									TPRG1L				TBC1D3	MICAL2
																																									TRAF1				TBC1D3H	MICAL3
																																									TRIB1				TCAF2	MICALCL
																																									TRIM14				TCEAL9	MICALL2
																																									TRIM22				TCF4	MID2
																																									TRIM47				TCF7	MIF4GD
																																									TRIM58				TCF7L1	MIS18BP1
																																									TRIP6				TCHH	MISP3
																																									TRPM2				TDP2	MLYCD
																																									TSC22D3				TDRKH	MMP17
																																									TSPYL4				TEKT4	MOB3B
																																									TTYH3				TESK2	MOGAT1
																																									TUBA1A				TET3	MPP3
																																									TXLNB				TFAP2C	MPRIP
																																									UBAC1				TFPT	MPV17L
																																									UBE3A				TGFBI	MPZL2
																																									UCP2				THBD	MPZL3
																																									ULK1				THBS1	MRAS
																																									ULK2				THG1L	MRGPRF
																																									UNC93B1				THOC1	MSC
																																									UTRN				TIMM9	MSI2
																																									VAMP4				TLNRD1	MSRB1
																																									VAMP5				TLR5	MT1E
																																									VAV3				TLR9	MT1X
																																									VIPAS39				TMEM106A	MT2A
																																									VNN2				TMEM144	MTHFD1L
																																									WAS				TMEM159	MTMR11
																																									WASHC4				TMEM163	MTURN
																																									WBP1L				TMEM206	MUSTN1
																																									WDFY1				TMEM220	MXD3
																																									WDFY2				TMEM26	MXRA7
																																									WDFY3				TMEM266	MYB
																																									WDR11				TMEM268	MYBPC3
																																									WIPF1				TMEM37	MYBPH
																																									WNT5A				TMEM45A	MYC
																																									WWP1				TMEM70	MYCBP
																																									XPO7				TMEM97	MYCBPAP
																																									ZBED1				TMIGD3	MYCL
																																									ZC3H12D				TNFRSF11A	MYH10
																																									ZDHHC2				TNFRSF14	MYH7B
																																									ZFP36L1				TOX2	MYO15A
																																									ZFYVE26				TPCN1	MYO6
																																									ZFYVE28				TPD52L2	MYO7B
																																									ZHX2				TPST1	MYOM1
																																									ZKSCAN4				TRAF5	MYOZ1
																																									ZMYM2				TREM2	MYRF
																																									ZNF331				TRIB1	N4BP3
																																									ZNF358				TRIM36	NAB2
																																									ZNF395				TRIM47	NANOG
																																									ZNF496				TRIM6	NANOS1
																																									ZNF516				TRIM69	NAPSA
																																									ZNF687				TRPM2	NAT8L
																																									ZNF704				TRPM8	NATD1
																																									ZNF746				TSHZ3	NBR1
																																									ZSCAN26				TSPAN4	NCAPH
																																									ZSWIM6				TTC21B	NCDN
																																									ZZEF1				TTN	NCF1
																																													TTYH3	NCKAP1
																																													TUBA1C	NCR1
																																													TUBGCP2	NDP
																																													TWF1	NDRG2
																																													TWIST1	NDRG4
																																													TXK	NECTIN1
																																													TXNL4B	NEDD9
																																													UAP1L1	NEMP1
																																													UBA6	NES
																																													UBE3A	NFAM1
																																													UGCG	NFE2
																																													UHRF1BP1	NFE2L3
																																													USP54	NFIX
																																													VAC14	NHSL2
																																													VAV3	NINL
																																													VEGFA	NIPAL1
																																													VEGFB	NIPAL3
																																													WDR63	NLGN2
																																													WDR7	NLRC4
																																													WDR83	NLRC5
																																													WDR91	NLRP1
																																													WNT5A	NMUR1
																																													WWP1	NOD2
																																													XAF1	NOL4L
																																													XCR1	NOS1AP
																																													XPA	NOS3
																																													YEATS2	NOTCH3
																																													ZC3H12D	NPAS1
																																													ZC3H8	NPBWR1
																																													ZFAND1	NPR1
																																													ZFP36L1	NR2F6
																																													ZFPM2	NR4A3
																																													ZFYVE28	NRCAM
																																													ZKSCAN4	NRGN
																																													ZMYND12	NRROS
																																													ZNF16	NRSN2
																																													ZNF22	NTHL1
																																													ZNF267	NUAK2
																																													ZNF280D	NUDT7
																																													ZNF296	NUMB
																																													ZNF331	NWD1
																																													ZNF33A	NXPE3
																																													ZNF33B	NXPH3
																																													ZNF358	OAF
																																													ZNF449	OBSL1
																																													ZNF480	OCSTAMP
																																													ZNF496	OLFM1
																																													ZNF503	OLFM2
																																													ZNF581	OPRL1
																																													ZNF616	OR52K2
																																													ZNF622	ORAI2
																																													ZNF704	OSBPL5
																																													ZNF710	OTUB2
																																													ZNF746	OTUD7B
																																													ZNF836	OXER1
																																													ZNF84	P2RX5
																																													ZSCAN20	P2RY12
																																													ZSCAN26	P2RY13
																																													ZSCAN30	P3H3
																																													ZSCAN9	PABPC1L
																																													ZSWIM8	PADI2
																																														PALD1
																																														PANX2
																																														PAQR5
																																														PARD6A
																																														PARM1
																																														PBK
																																														PCARE
																																														PCBP4
																																														PCDH1
																																														PCDH12
																																														PCDHGC3
																																														PCMTD1
																																														PCSK5
																																														PCSK9
																																														PCYOX1L
																																														PDCD4
																																														PDE3B
																																														PDE4B
																																														PDE6G
																																														PDGFA
																																														PDGFRB
																																														PDK2
																																														PDK4
																																														PDLIM7
																																														PDZD7
																																														PEAR1
																																														PEBP4
																																														PECAM1
																																														PELI2
																																														PELI3
																																														PFKFB4
																																														PGM5
																																														PHF24
																																														PHLDA3
																																														PHLPP2
																																														PHOSPHO1
																																														PIK3C2B
																																														PIK3CD
																																														PIK3CG
																																														PIM1
																																														PINK1
																																														PIP5K1B
																																														PIP5KL1
																																														PITPNM3
																																														PKP2
																																														PLA2G16
																																														PLA2G6
																																														PLAC8
																																														PLCD1
																																														PLEKHB1
																																														PLEKHF1
																																														PLEKHG3
																																														PLEKHG5
																																														PLEKHO1
																																														PLIN4
																																														PLPP1
																																														PLPP6
																																														PLXDC2
																																														PLXNB1
																																														PM20D2
																																														PMEPA1
																																														PNPLA1
																																														PNPLA2
																																														PNPLA7
																																														PODN
																																														PODXL
																																														POLR3B
																																														POU2F2
																																														POU3F1
																																														PPARGC1B
																																														PPM1J
																																														PPM1N
																																														PPP1R13B
																																														PPP1R17
																																														PPP1R3G
																																														PPP2R3B
																																														PRAM1
																																														PRKCE
																																														PRMT6
																																														PROC
																																														PRRT4
																																														PRSS36
																																														PSD
																																														PSD3
																																														PSPC1
																																														PTK2
																																														PTK2B
																																														PTK7
																																														PTP4A3
																																														PTPMT1
																																														PTPN13
																																														PTPRE
																																														PXYLP1
																																														PYCARD
																																														RAB11FIP4
																																														RAB15
																																														RAB36
																																														RAB37
																																														RAB40B
																																														RAB9B
																																														RALGPS1
																																														RAMP1
																																														RAP1GAP
																																														RAP1GAP2
																																														RAPGEFL1
																																														RARA
																																														RARRES3
																																														RASAL2
																																														RASGRF1
																																														RASGRP1
																																														RASGRP2
																																														RASL10A
																																														RASL11A
																																														RASL12
																																														RASSF5
																																														RAVER2
																																														RBM38
																																														RBPMS2
																																														RECK
																																														REEP1
																																														REEP2
																																														RETN
																																														RFX2
																																														RGCC
																																														RGS16
																																														RGS20
																																														RGS3
																																														RHBDF1
																																														RHBDL3
																																														RHOBTB2
																																														RHOC
																																														RHOD
																																														RHOF
																																														RHPN1
																																														RIMBP3
																																														RIMBP3B
																																														RIPOR2
																																														RMI2
																																														RMND5A
																																														RNF122
																																														RNF125
																																														RNF128
																																														RNF149
																																														RNF207
																																														RNF215
																																														RNF24
																																														ROBO3
																																														ROGDI
																																														RPH3AL
																																														RPS6KA4
																																														RRAD
																																														RRP12
																																														RRS1
																																														RSPO3
																																														RSPO4
																																														RTN1
																																														RTN4RL2
																																														RUFY4
																																														RXRB
																																														RYR1
																																														S100A1
																																														S100A13
																																														S100A16
																																														S100A3
																																														S100A4
																																														S100A8
																																														S1PR3
																																														S1PR4
																																														SALL2
																																														SARDH
																																														SATB2
																																														SBK1
																																														SCIN
																																														SCNN1A
																																														SDC1
																																														SEC14L2
																																														SEL1L3
																																														SELENON
																																														SEMA3G
																																														SEMA4F
																																														SEMA7A
																																														SERPINA1
																																														SERPINE1
																																														SERPING1
																																														SERPINI1
																																														SERTAD2
																																														SETD6
																																														SGCB
																																														SGMS2
																																														SH2B2
																																														SH2D3C
																																														SH2D4A
																																														SH3BGRL3
																																														SH3BP4
																																														SH3PXD2A
																																														SHANK3
																																														SHROOM4
																																														SIGIRR
																																														SIGLEC11
																																														SIGLEC14
																																														SIGLEC15
																																														SIGLEC16
																																														SIK1B
																																														SLAMF8
																																														SLC12A8
																																														SLC13A5
																																														SLC16A2
																																														SLC1A2
																																														SLC1A7
																																														SLC20A1
																																														SLC22A4
																																														SLC24A4
																																														SLC25A15
																																														SLC25A25
																																														SLC25A29
																																														SLC25A35
																																														SLC25A37
																																														SLC27A2
																																														SLC27A3
																																														SLC28A3
																																														SLC29A1
																																														SLC29A2
																																														SLC29A3
																																														SLC2A12
																																														SLC2A4RG
																																														SLC2A6
																																														SLC30A3
																																														SLC31A2
																																														SLC35E4
																																														SLC35F3
																																														SLC36A4
																																														SLC37A3
																																														SLC38A1
																																														SLC39A10
																																														SLC39A14
																																														SLC44A2
																																														SLC45A3
																																														SLC46A2
																																														SLC4A11
																																														SLC51B
																																														SLC6A12
																																														SLC6A7
																																														SLC9A3
																																														SLC9A3R2
																																														SLC9A7
																																														SLCO3A1
																																														SLCO4C1
																																														SLFN12L
																																														SLITRK4
																																														SMAD7
																																														SMARCD3
																																														SMIM1
																																														SMIM14
																																														SMO
																																														SNAI3
																																														SNED1
																																														SNTA1
																																														SNX10
																																														SNX22
																																														SOBP
																																														SOCS1
																																														SOCS3
																																														SORBS1
																																														SORT1
																																														SOWAHC
																																														SOX12
																																														SOX13
																																														SOX4
																																														SOX8
																																														SPA17
																																														SPARC
																																														SPATA13
																																														SPEG
																																														SPIN4
																																														SPINT1
																																														SPIRE2
																																														SPN
																																														SPOCD1
																																														SPON2
																																														SPSB1
																																														SPSB2
																																														SPSB3
																																														SPTBN1
																																														SPTBN2
																																														SRCIN1
																																														SRD5A3
																																														SRRM3
																																														SSBP3
																																														SSC4D
																																														SSPN
																																														SSPO
																																														ST3GAL2
																																														ST6GALNAC4
																																														ST6GALNAC6
																																														STAC2
																																														STEAP4
																																														STIMATE
																																														STIP1
																																														STK17B
																																														STK38
																																														STK39
																																														STON1
																																														STUM
																																														STX1B
																																														SULT1B1
																																														SUN2
																																														SVIL
																																														SVIP
																																														SYNC
																																														SYNGR1
																																														SYNJ2
																																														SYP
																																														SYT11
																																														SYTL1
																																														TACSTD2
																																														TAF4B
																																														TAF9B
																																														TAX1BP1
																																														TAX1BP3
																																														TBC1D15
																																														TBX21
																																														TBX6
																																														TBXA2R
																																														TCEA3
																																														TCF7L2
																																														TCFL5
																																														TCP11L2
																																														TEAD2
																																														TEAD3
																																														TEDC1
																																														TESC
																																														TET1
																																														TFAP4
																																														TFDP2
																																														TGFBR1
																																														TGFBR3L
																																														THRA
																																														THYN1
																																														TIE1
																																														TIGD1
																																														TIMP4
																																														TJP1
																																														TJP2
																																														TLCD1
																																														TLCD2
																																														TLE1
																																														TLN2
																																														TLR8
																																														TM4SF19
																																														TMCC2
																																														TMEM114
																																														TMEM121B
																																														TMEM130
																																														TMEM132A
																																														TMEM143
																																														TMEM151A
																																														TMEM158
																																														TMEM173
																																														TMEM177
																																														TMEM178A
																																														TMEM217
																																														TMEM221
																																														TMEM229B
																																														TMEM235
																																														TMEM237
																																														TMEM38A
																																														TMEM52
																																														TMEM56
																																														TMEM74B
																																														TMEM8B
																																														TMEM91
																																														TMEM92
																																														TMPO
																																														TMPRSS13
																																														TMPRSS4
																																														TMTC2
																																														TNC
																																														TNFAIP8L1
																																														TNFAIP8L3
																																														TNFRSF10C
																																														TNFRSF1B
																																														TNFRSF6B
																																														TNFRSF8
																																														TNFSF10
																																														TNFSF14
																																														TNNT1
																																														TNS2
																																														TOB1
																																														TOGARAM2
																																														TP53
																																														TPM2
																																														TRABD2A
																																														TRAM2
																																														TREM1
																																														TREML2
																																														TRHDE
																																														TRIM22
																																														TRIM35
																																														TRIM54
																																														TRIM72
																																														TRNP1
																																														TRPC6
																																														TSC22D1
																																														TSEN2
																																														TSKU
																																														TSPAN14
																																														TSPAN15
																																														TSPAN17
																																														TSPAN2
																																														TSPAN32
																																														TSPAN5
																																														TSPOAP1
																																														TTC24
																																														TTC30A
																																														TTC30B
																																														TTC39C
																																														TTLL1
																																														TUBA8
																																														TUBB4A
																																														TWNK
																																														TXLNB
																																														TYSND1
																																														UBA7
																																														UBALD1
																																														UBALD2
																																														ULK1
																																														UNC5B
																																														USP2
																																														USP25
																																														VAMP1
																																														VASH1
																																														VASN
																																														VASP
																																														VAT1L
																																														VIPR1
																																														VIT
																																														VKORC1L1
																																														VMAC
																																														VNN2
																																														VSIG4
																																														VSNL1
																																														VWA7
																																														WARS
																																														WBP1
																																														WDR25
																																														WDR45
																																														WDR48
																																														WFS1
																																														WNT11
																																														WTIP
																																														XIRP1
																																														XPC
																																														YIPF4
																																														YPEL2
																																														YPEL4
																																														ZBTB22
																																														ZBTB42
																																														ZBTB46
																																														ZBTB7C
																																														ZC3H12A
																																														ZCCHC2
																																														ZCCHC24
																																														ZFAND4
																																														ZFP69B
																																														ZMYND15
																																														ZNF365
																																														ZNF366
																																														ZNF385A
																																														ZNF467
																																														ZNF711
																																														ZNRF1
																																														ZP3
																																														ZSCAN16
																																														ZYX
[truncated: 4 more columns]
